# Supplementary material for: Omicron COVID-19 immune correlates analysis of a third dose of mRNA-1273 in the COVE trial
Source: PubMed Central journal article supplement (PMC11390939; doi:10.1038/s41467-024-52348-9), 2024-09-11
Supplement: 41467_2024_52348_MOESM1_ESM.pdf [file 41467_2024_52348_MOESM1_ESM.pdf]

## Supplementary Information for

### Omicron COVID-19 Immune Correlates Analysis of a Third Dose of mRNA-1273 in the COVE Trial

Bo Zhang, Youyi Fong, Jonathan Fintzi, Eric Chu, Holly E. Janes, Avi Kenny, Marco Carone, David Benkeser, Lars van der Laan, Weiping Deng, Honghong Zhou, Xiaowei Wang, Yiwen Lu, Chenchen Yu, Bhavesh Borate, Haiyan Chen, Isabel Reeder, Lindsay N. Carpp, Christopher R. Houchens, Karen Martins, Lakshmi Jayashankar, Chuong Huynh, Carl J. Fichtenbaum, Spyros Kalams, Cynthia L. Gay, Michele P. Andrasik, James G. Kublin, Lawrence Corey, Kathleen M. Neuzil, Frances Priddy, Rituparna Das, Bethany Girard, Hana M. El Sahly, Lindsey R. Baden, Ruben O. Donis, Richard A. Koup, Peter B. Gilbert, Dean Follmann\*, on behalf of the United States Government (USG) COVID-19 Immune Assays Team; Moderna, Inc. Team; Coronavirus Vaccine Prevention Network (CoVPN)/Coronavirus Efficacy (COVE) Team; and USG/CoVPN Biostatistics Team

Correspondence to: [dfollmann@niaid.nih.gov](mailto:dfollmann@niaid.nih.gov)

#### **Contents:**

Supplementary Tables 1-15  
Supplementary Figures 1-37  
Supplementary References  
Statistical Analysis Plan

## United States Government (USG) COVID-19 Immune Assays Team

(PubMed listed, and ordered alphabetically by affiliation)

| Affiliation                                                                                                                                                                                                                                                                                                                                                                     | Team Members                                                                                                                                                                                                                                                                                                                                                                                                                                 |
|---------------------------------------------------------------------------------------------------------------------------------------------------------------------------------------------------------------------------------------------------------------------------------------------------------------------------------------------------------------------------------|----------------------------------------------------------------------------------------------------------------------------------------------------------------------------------------------------------------------------------------------------------------------------------------------------------------------------------------------------------------------------------------------------------------------------------------------|
| Biomedical Advanced Research and Development Authority (BARDA), Washington, DC                                                                                                                                                                                                                                                                                                  | Oleg Borisov, Flora Castellino, Brett Chromy, Mark Delvecchio, Ruben O. Donis, Tremel Faison, Corey Hoffman, Christopher Houchens, Tom Hu, Chuong Huynh, Pennie Hylton, Lakshmi Jayashankar, Aparna Kolhekar, James Little, Karen Martins, Jeanne Novak, Carol Sabourin, Evan Sturtevant, Xiaomi Tong, John Treanor, Danielle Turley, Leah Watson                                                                                            |
| Boston Consulting Group, Boston, MA                                                                                                                                                                                                                                                                                                                                             | Gian King, Andrew Li, Najaf Shah, Smruthi Suryaprakash, Jue Xiang Wang                                                                                                                                                                                                                                                                                                                                                                       |
| Division of AIDS, NIAID, NIH, Bethesda, MD<br>Division of MID (Microbiology and Infectious Diseases), NIAID, NIH, Bethesda, MD<br>Duke University, Durham, NC                                                                                                                                                                                                                   | Patricia D'Souza<br>Janie Russell<br>David Beaumont, Kendall Bradley, Jiayu Chen, Xiaoju Daniell, Thomas Denny, Elizabeth Domin, Amanda Eaton, Kelsey Engel, Wenhong Feng, Juanfei Gao, Hongmei Gao, Kelli Greene, Sarah Hiles, Leihua Liu, Kristy Long, Kellen Lund, Charlene McDanal, David C. Montefiori, Marcella Sarzotti-Kelsoe, Francesca Suman, Haili Tang, Jin Tong, Olivia Widman<br>Christopher S. Badorrek, Gregory E. Rutkowski |
| The Tauri Group, an LMI company - Contract Support for U.S. Department of Defense (DOD) Joint Program Executive Office for Chemical, Biological, Radiological and Nuclear Defense (JPEO-CBRND) Joint Project Manager for Chemical, Biological, Radiological, and Nuclear Medical (JPM CBRN Medical), Fort Detrick, MD, USA<br>Vaccine Research Center, NIAID, NIH, Bethesda, MD | Akua Abrah, Obrimpong Amoa-Awua, Manjula Basappa, Robin Carroll, Erykah Coe, Jevone Fentress, Britta Flach, Suprabhath Gajjala, Nazaire Jean-Baptiste, Richard A. Koup, Bob C. Lin, Adrian McDermott, Christopher Moore, Mursal Naisan, Muhammed Naqvi, Sandeep Narpala, Sarah O'Connell, Abhinaya Srikanth, Clare Whittaker, Weiwei Wu                                                                                                      |

## Moderna, Inc. Team

(PubMed listed, ordered alphabetically)

| Affiliation                  | Team Members                                                            |
|------------------------------|-------------------------------------------------------------------------|
| Moderna, Inc., Cambridge, MA | Weiping Deng, Shu Hahn, Jacqueline Miller, Rolando Pajon, Honghong Zhou |

## Coronavirus Vaccine Prevention Network (CoVPN)/Coronavirus Efficacy (COVE) Team

(PubMed listed, and ordered alphabetically by institution affiliation)

| Affiliation/Funding*                                                                                             | Study Group                                                                                                                                                                                            | Location           |
|------------------------------------------------------------------------------------------------------------------|--------------------------------------------------------------------------------------------------------------------------------------------------------------------------------------------------------|--------------------|
| AB Clinical Trials                                                                                               | Atoya Adams, MD, MBA, Eric Miller                                                                                                                                                                      | Las Vegas, NV      |
| Accel Research Sites                                                                                             | Bruce G. Rankin DO, John Hill MD, Steven Shinn MD, Marshall Nash MD                                                                                                                                    | DeLand, FL         |
| Advanced Clinical Research                                                                                       | Sinikka L. Green MD, Colleen Jacobsen, Jayasree Krishnankutty, Sikhongi Phungwayo                                                                                                                      | Cedar Park, TX     |
| Alliance for Multispecialty Research                                                                             | Richard M. Glover, II MD, Drs. Stacy Slechta, Troy Holdeman, Robyn Hartvickson, Amber Grant                                                                                                            | Newton, KS         |
| Alliance for Multispecialty Research                                                                             | Terry L. Poling MD, Terry D. Klein MD, Thomas C. Klein MD, Tracy R. Klein MD                                                                                                                           | Wichita, KS        |
| Alliance for Multispecialty Research                                                                             | William B. Smith MD, Richard L. Gibson MD, Jennifer Winbigler MD, Elizabeth Parker PA                                                                                                                  | Knoxville, TN      |
| Baptist Health Center for Clinical Research                                                                      | Priyantha N. Wijewardane, MD, Eric Bravo MD, Jeffrey Thessing MD, Michelle Maxwell APRN, Amanda Horn APRN                                                                                              | Little Rock, AR    |
| Baylor College of Medicine, NIAID 1UM1AI148575-01S2                                                              | Hana El Sahly MD, Jennifer Whitaker MD, Catherine Mary Healy MD, Christine Akamine MD                                                                                                                  | Houston, TX        |
| Benchmark Research                                                                                               | Laurence Chu, MD, R. Michelle Chouteau, MD                                                                                                                                                             | Austin, TX         |
| Benchmark Research                                                                                               | Michael J. Cotugno MD, George H. Bauer, Jr. MD                                                                                                                                                         | Metairie, LA       |
| Benchmark Research                                                                                               | Greg Hachigian MD, Masaru Oshita MD, Michael Cancilla NP, Deborah Murray NP, Kristen Kiersey NP                                                                                                        | Sacramento, CA     |
| Benchmark Research                                                                                               | William Seger MD, Mohammed Antwi, Allison Green, Anthony Kim                                                                                                                                           | Fort Worth, TX     |
| Brigham and Women's Hospital, NIAID UM1AI069412, NCATS UL1RR025758                                               | Lindsey R Baden MD, Michael Desjardins MD, Jennifer A Johnson MD, Amy Sherman MD, Stephen R Walsh MD                                                                                                   | Boston, MA         |
| Carolina Institute for Clinical Research                                                                         | Judith Borger DO, Ryan Starr DO, Scott Syndergaard DO, Nafisa Saleem MD                                                                                                                                | Fayetteville, NC   |
| Centex Studies                                                                                                   | Joel Solis MD, Martha Carmen Medina PA-C, Westly Keating PA-C, Edgar Garcia PA-C, Cynthia Bueno PA-C                                                                                                   | McAllen, TX        |
| Clinical Research Atlanta                                                                                        | Nathan Segall MD, Nathan Segall, Jon Finley, Mildred Stull                                                                                                                                             | Stockbridge, GA    |
| Clinical Trials of Texas                                                                                         | Douglas Scott Denham DO, Thomas Weiss MD, Ayoadé Aworo DNP, Parke Hedges MD                                                                                                                            | San Antonio, TX    |
| Coastal Carolina Research Center                                                                                 | Cynthia Becher Strout MD, Rica Santiago, Yvonne Davis, Patty Howenstine, Alison Bondell                                                                                                                | Mount Pleasant, SC |
| Cornell Clinical Trials Unit - Weill Cornell Uptown & Weill Cornell Chelsea, NIAID UM1AI068619, NCAT UL1TR002384 | Kristin Marks MS MD, Grant Ellsworth, MS, MD, Tina Wang, MD, Timothy Wilkin, MD, MPH, Mary Vogler, MD, Carrie Johnston, MD, MS                                                                         | New York, NY       |
| Covid19 Prevention Network (CoVPN, NIAID-NIH)                                                                    | Michele P Andrasik, Jessica G Andriesen, Gail Broder, Lawrence Corey, Niles Eaton, Kathleen M Neuzil, Huub G Gelderblom, James G Kubiin, Rachael McClennen, Nelson Michael, Merlin Robb, Carrie Sopher | Seattle, WA        |
| DM Clinical Research                                                                                             | Vicki E. Miller MD, MPH, Fredric Santiago MD, Blanca Gomez FNP-C, Insiya Valika PA-C, Amy Starr FNP-C                                                                                                  | Tomball, TX        |
| Emory University – Ponce de Leon Clinical Research Site, NIAID 3UM1AI068614-14S1                                 | Colleen Kelley MD MPH, Valeria D Cantos MD, Sheetal Kandiah MD MPH, Carlos del Rio MD                                                                                                                  | Atlanta, GA        |
| Emory University – Hope Clinic, NIAID 1UM1AI148576-01                                                            | Nadine Roupheal MD, Paulina Rebolledo, Srilatha Edupuganti, Daniel Sans Graciaa                                                                                                                        | Decatur, GA        |
| Emory University School of Medicine, NIAID 1UM1AI148576-01                                                       | Evan J Anderson MD, Andres Camacho-Gonzalez MD, Satoshi Kamidani MD, Christiana A Rostad MD, Meghan Teherani MD                                                                                        | Atlanta, GA        |
| George Washington University, NIAID UM1AI068619                                                                  | David Joseph Diemert MD, Elissa Malkin, Marc Siegel, Afsoon Roberts, Gary Simon                                                                                                                        | Washington, DC     |
| Hackensack University Medical Center                                                                             | Bindu Balani MD, Carolene Stephenson, Steven Sperber, Cristina Cicogna                                                                                                                                 | Hackensack, NJ     |
| Henry Ford Health System                                                                                         | Marcus J. Zervos MD, Paul Kilgore MD, MPH, Mayur Ramesh MD, Erica Herc MD, Kate Zenlea MPH                                                                                                             | Detroit, MI        |
| Hope Research Institute                                                                                          | Abram Burgher MD, Ann Marie Milliken                                                                                                                                                                   | Phoenix, AZ        |
| Hope Research Institute                                                                                          | Joseph D. Davis MD, Brendan Levy, Sandra Kelman                                                                                                                                                        | Chandler, AZ       |
| Hope Research Institute                                                                                          | Matthew W. Doust MD, Denise Sample, Sandra Erickson                                                                                                                                                    | Phoenix, AZ        |
| J. Lewis Research                                                                                                | Shane Glade Christensen MD, Christopher Matich, James Longe, John Witbeck                                                                                                                              | Salt Lake City, UT |
| J. Lewis Research                                                                                                | James Todd Peterson MD, Alexander Clark, Gerald Kely, Issac Pena-Renteria                                                                                                                              | Salt Lake City, UT |

| <b>Affiliation/Funding*</b>                                                   | <b>Study Group</b>                                                                                                     | <b>Location</b>      |
|-------------------------------------------------------------------------------|------------------------------------------------------------------------------------------------------------------------|----------------------|
| Jacksonville Center for Clinical Research                                     | Michael J. Koren MD, Darlene Bartilucci MD, Jeffery Jacqmein MD, Alpa Patel MD, Carolyn Tran MD                        | Jacksonville, FL     |
| Javara                                                                        | Christina Kennelly MD, Robert Brownlee, Jacob Coleman, Hala Webster                                                    | Charlotte, NC        |
| Johnson County Clin-Trials                                                    | Carlos A. Fierro MD, Natalia Leistner, Amy Thompson, Celia Gonzalez                                                    | Lenexa, KS           |
| Kaiser Permanente Washington Health Research Institute, NIAID 1UM1AI148373-01 | Lisa A Jackson MD MPH, Janice Suyehira MD                                                                              | Seattle, WA          |
| Laguna Clinical Research Associates                                           | Milton Haber MD, Maria M. Regalado MD, Veronica Procasky RN JD, Alisha Lutat                                           | Laredo, TX           |
| Lynn Health Science Institute                                                 | Carl P. Griffin MD, Raymond Cornelison, William Schnitz, Shanda Gower                                                  | Oklahoma City, OK    |
| Lynn Institute of the Rockies                                                 | Ripley R. Hollister MD, Jeremy Brown DO, Melody Ronk PA-C                                                              | Colorado Springs, CO |
| M3 Wake Research                                                              | Wayne Lee Harper MD, Lisa Cohen DO, Lynn Eckert PA-C, Matthew Hong MD                                                  | Raleigh, NC          |
| MediSync Clinical Research Hattiesburg Clinic                                 | Rambod Rouhbakhsh MD, MBA, Elizabeth Danford MD, John Johnson MD, Richard Calderone MD                                 | Petal, MS            |
| Meridian Clinical Research                                                    | Shishir Kumar Khetan MD, Oyebisi Olanrewaju AC-CRNP, Nan Zhai NP-C, Kimberly Nieves AC-CRNP, Allison O'Brien AC-CRNP   | Rockville, MD        |
| Meridian Clinical Research                                                    | Paul Simon Bradley MD, Amanda Lilienthal MSN NP-C, Jim Callis PA-C                                                     | Savannah, GA         |
| Meridian Clinical Research                                                    | Adam Benson Brosz MD, Andrea Clement PA, Whitney West APRN, Luke Friesen PA, Paul Cramer APRN                          | Grand Island, NE     |
| Meridian Clinical Research                                                    | Frank Steven Eder MD, Ryan Little FNP, Victoria Engler FNP, John Tarbox FNP, Heather Rattenbury-Shaw DO                | Binghamton, NY       |
| Meridian Clinical Research                                                    | David Jon Ensz MD, Tavane Harrison, Allie Oplinger                                                                     | Dakota Dunes, SD     |
| Meridian Clinical Research                                                    | Brandon James Essink MD, Jay Meyer MD, Frederick Raiser, III MD, Kimberly Mueller APRN, Roni Gray PA                   | Omaha, NE            |
| Meridian Clinical Research                                                    | Keith William Vrbicky MD, Charles Harper MD, Chelsie Nutsch MD, Wendell Lewis III MD, Cathy Laflan MD                  | Norfolk, NE          |
| Meridian Clinical Research                                                    | Jordan L. Whatley MD, Nicole Harrell MD, Amie Shannon MD, Crystal Rowell APRN, FNP-C, Christopher Dedon APRN, FNP-C    | Baton Rouge, LA      |
| NIH                                                                           | Mamodikoe Makhene MD MPH                                                                                               | Bethesda, MD         |
| New Horizons Clinical Research                                                | Gregory Mark Gottschlich MD, Kate Harden PA-C, Melissa Gottschlich PA-C, Mary Smith MSN, FNP-C, Richard Powell MD      | Cincinnati, OH       |
| Optimal Research                                                              | Murray A. Kimmel DO, Simmy Pinto MD                                                                                    | Melbourne, FL        |
| Optimal Research                                                              | Timothy P. Vachris MD, Mark Hutchens MD, Stephen Daniels DO, Margaret Wells MD                                         | Austin, TX           |
| Optimal Research                                                              | Mimi Van Der Leden MD, PhD, Peta Gay Jackson Booth MD                                                                  | Rockville, MD        |
| Palm Beach Research Center                                                    | Mira Baron MD, Pamela Kane DO, Shannen Seversen PA-C, Mara Kryvicky PA-C, Julia Lord PA-C                              | West Palm Beach, FL  |
| Paradigm Clinical Research Center                                             | Jamshid Saleh MD, Matthew Miles, Rafael Lupercio                                                                       | Redding, CA          |
| Quality of Life Medical & Research Centers                                    | John W. McGettigan Jr. MD, Walter Patton MD, Riemke Brakema MD, Karin Choquette MSN, ABNP-C, Jonlyn McGettigan MSN, RN | Tucson, AZ           |
| Rancho Paseo Medical Group                                                    | Judith L. Kirstein MD, Marcia Bernard NP                                                                               | Banning, CA          |
| Rapid Medical Research                                                        | Mary Beth Manning MD, Joan Rothenberg MD, Toby Briskin MD, Denise Roadman PAC, Sharita Tedder-Edwards FNP              | Cleveland, OH        |
| Research Centers of America                                                   | Howard I. Schwartz MD, Surisday Mederos, Barbara Corral, Jennifer Schwartz, Nelia Sanchez-Crespo                       | Hollywood, FL        |
| Rutgers New Jersey Medical School, NIAID UM1AI068619                          | Shobha Swaminathan MD, Amesika Nyaku MD MS, Tilly Varughese MD, Michelle DallaPiazza MD                                | Newark, NJ           |
| Saint Louis University, NIAID 1UM1AI148685-01                                 | Sharon E Frey MD, Irene Graham MD, Getahun Abate MD PhD MSc, Daniel Hoft MD PhD                                        | St. Louis, MO        |
| St. Vincent's Health System                                                   | Leland N. Allen III MD, Leslie Anne Edwards MSN, CRNP, William Simpson Davis Jr., MS PA-C, Jessica Maria Mena, PA      | Birmingham, AL       |
| Suncoast Research Group                                                       | Mark E. Kutner MD, Jorge Caso MD, CPI, Maria Hernandez Moran APRN, Marianela Carvajal APRN, Janet Mendez APRN          | Miami, FL            |
| Sundance Clinical Research                                                    | Larkin T. Wadsworth III MD, Horacio Marafioti, Lyly Dang, Jennifer Berry, Lauren Clement                               | St. Louis, MO        |
| Synexus Clinical Research                                                     | Michael Ryan Adams MD, Leslie Iverson PA                                                                               | Murray, UT           |
| Synexus Clinical Research                                                     | Joseph Lee Newberg MD, Laura Pearlman MS, MD, MBA                                                                      | Chicago, IL          |
| Synexus Clinical Research                                                     | Paul Joseph Nugent DO, Leonard Singer                                                                                  | Cincinnati, OH       |

| <b>Affiliation/Funding*</b>                                               | <b>Study Group</b>                                                                                                                                                                                                        | <b>Location</b>   |
|---------------------------------------------------------------------------|---------------------------------------------------------------------------------------------------------------------------------------------------------------------------------------------------------------------------|-------------------|
| Synexus Clinical Research                                                 | Michele Diane Reynolds MD, Jennifer Bashour MD, Robert Schmidt MD                                                                                                                                                         | Dallas, TX        |
| Synexus Clinical Research                                                 | Neil Parmanand Sheth MD, Kenneth Steil DO                                                                                                                                                                                 | Glendale, AZ      |
| Synexus Clinical Research                                                 | Ramy Joseph Toma MD, William Kirby MD, Pink Folmar MD, Samantha Williams NP                                                                                                                                               | Birmingham, AL    |
| Synexus Clinical Research                                                 | Judith White MD, Robert Meyer MD, Sejal Patel MD, Prity Patel APRN                                                                                                                                                        | Orlando, FL       |
| Tekton Research                                                           | Paul Pickrell MD, Stefanie Mott FNP-C, Carol Ann Linebarger MD, Hussain Malbari MD, David Pampe MD                                                                                                                        | Austin, TX        |
| Texas Center for Drug Development                                         | Veronica G. Fragoso MD, Lisa Holloway MD, Cecilia McKeown-Bragas MD, Teresa Becker MD, Vicki Miller MD                                                                                                                    | Houston, TX       |
| Trial Management Associates                                               | Barton G. Williams MD, William H. Jones MD                                                                                                                                                                                | Wilmington, NC    |
| VA Greater Los Angeles Healthcare System                                  | Michael Lewis MD, Elham Ghadishah, Joseph Yusin, Mai Pham                                                                                                                                                                 | Los Angeles, CA   |
| University of California Los Angeles, NIAID UM1AI068619                   | Jesse L Clark MD, Steven Shoptaw PhD, Michele Vertucci PA, NP, Will Hernandez NP                                                                                                                                          | Los Angeles, CA   |
| University of California San Diego, NIAID UM1AI068636                     | Stephen A. Spector MD, Amaran Moodley MD, Jill Blumenthal MD, Lisa Stangl NP, Karen Deutsch NP                                                                                                                            | La Jolla, CA      |
| University of Chicago                                                     | Kathleen M. Mullane DO PharmD, David Pitrak MD, Cheryl Nuss FNP, Judy Pi PharmD                                                                                                                                           | Chicago, IL       |
| University of Cincinnati, NIAID UN1AI068619                               | Carl Fichtenbaum MD, Margaret Powers-Fletcher PhD, Michelle Saemann RN, Sharon Kohrs RN                                                                                                                                   | Cincinnati, OH    |
| University of Colorado Denver, Anschutz Medical Campus, NIAID UM1AI068636 | Thomas B. Campbell MD, Andrew Lauria, Jose Castillo Mancilla, Hillary Dunlevy                                                                                                                                             | Aurora, CO        |
| University of Illinois at Chicago – Project WISH, NIAID UM1AI068619       | Richard M Novak MD, Andrea Wendrow, Scott Borgetti, Ben Ladner                                                                                                                                                            | Chicago, IL       |
| University of Maryland School of Medicine, NIAID 1UM1AI148689-01          | Karen L Kotloff MD, Matthew Laurens, Milagritos Tapia, Lisa Chrisley, Cheryl Young                                                                                                                                        | Baltimore, MD     |
| University of Miami, NIAID 3UM1AI068614-14S1                              | Susanne Doblecki-Lewis MD, Maria Luisa Alcaide, Jose Gonzales-Zamora, Stephen Morris                                                                                                                                      | Miami, FL         |
| University of North Carolina at Chapel Hill, NIAID UM1AI068619            | Cynthia Gay MD MPH, Erin Hoffman, Susan Pedersen, Maria Bullis, Mandy Tipton, Carolina Pastrana Medina, Catherine Kronk, Nicole Maponga, Julie Nelson, Becky Straub, Amy James Loftis, David Wohl MD, Joseph Eron, Jr. MD | Chapel Hill, NC   |
| University of Pennsylvania, NIAID 3UM1AI068614-14S1                       | Ian Frank MD, Debora Dunbar, David Metzger, Florence Momplaisir                                                                                                                                                           | Philadelphia, PA  |
| University of Pittsburgh Medical Center, NIAID 1UM1AI148452-01            | Judith Martin MD, Alejandro Hoberman MD, Timothy Shope MD MPH, Gysella Muniz MD                                                                                                                                           | Pittsburgh, PA    |
| University of Texas Medical Branch, NIAID 1UM1AI148575-01                 | Richard Rupp MD, Amber Stanford PA-C, Megan Berman MD, Laura Porterfield MD                                                                                                                                               | Galveston, TX     |
| VA Greater Los Angeles Healthcare System                                  | Michael Lewis MD, Elham Ghadishah, Joseph Yusin, Mai Pham                                                                                                                                                                 | Los Angeles, CA   |
| Vanderbilt University Medical Center, NIAID 1UM1AI148452-01               | Clarence Buddy Creech II MD, Shannon Walker MD, Stephanie Rolsma MD PhD, Robert Samuels, Isaac Thomsen MD                                                                                                                 | Nashville, TN     |
| Vanderbilt University Medical Center, NIAID 3UM1AI068614-14S1             | Spyros Andrews Kalams MD, Greg Wilson MD                                                                                                                                                                                  | Nashville, TN     |
| Velocity Clinical Research                                                | Gregg H. Lucksinger MD, Kevin Parks MD, Ryan Israelsen MD, Jaleh Ostovar FNP-C, Kary Kelly FNP-C                                                                                                                          | Medford, OR       |
| Velocity Clinical Research, San Diego                                     | Jeffrey Scott Overcash MD, Hanh Chu, Kia Lee, Karla Zepeda                                                                                                                                                                | La Mesa, CA       |
| VitaLink Research                                                         | Luis I. De La Cruz MD, Steve Clemons, Elizabeth Everette, Suzanna Studdard                                                                                                                                                | Greenville, SC    |
| VitaLink Research                                                         | Gowdhami Mohan MD, Stefanie Tyson, Alyssa-Kay Peay, Danyel Johnson                                                                                                                                                        | Anderson, SC      |
| VitaLink Research-Spartanburg                                             | Gregory J. Feldman MD, May-Yin Suen, Jacqueline Muenzner, Joseph Boscia, Farhan Siddiqui                                                                                                                                  | Spartanburg, SC   |
| Wake Forest University Health Sciences                                    | John Sanders MD, PhD, James Peacock MD, Julio Nasim MD                                                                                                                                                                    | Winston Salem, NC |
| WR-Clinical Research Center of Nevada                                     | Michael L. Levin MD, Julie Hussey MSN APRN FNP-C, Marcy Kulic MD                                                                                                                                                          | Las Vegas, NV     |
| WR-ClinSearch                                                             | Mark Montgomery McKenzie MD, Teresa Deese, Erica Osmundsen, Christy Sweet                                                                                                                                                 | Chattanooga, TN   |
| WR-Global Medical Research                                                | Valentine Mbepon Ejuh MD MA MSc, Elwaleed Elnagar MD, Georgette Ejuh DNP APRN FNP-C, Genevieve Iwuala FNP                                                                                                                 | Dallas, TX        |
| WR-Medical Center for Clinical Research                                   | Laurie J. Han-Conrad MD, Todd Simmons MD, Denis Tarakjian MD                                                                                                                                                              | San Diego, CA     |

\*Funding of institutions by the National Institute of Allergy and Infectious Diseases (NIAID) and/or research support by the National Center for Advancing Translational Science (NCATS) as indicated. All other institutions were funded by Office of the Assistant Secretary for Preparedness and Response, Biomedical Advanced Research and Development Authority. The content of this publication is solely the responsibility of the authors and does not necessarily represent the official views of the funding sources.

## CoVPN/COVE Team (cont'd): COVE Trial Investigators and Study Teams

| Principal Investigator  | Study Team                                                                                                                                                                                                                                                                                                                                                                                                                                                                                                                                                                                                                                                                                                                                                                                                                                                                                                                                                                                                                                                                                                                                                                                                                                                                                                                                                                                                                                                                                                                                                                                                                                         | Institution                              | Location            |
|-------------------------|----------------------------------------------------------------------------------------------------------------------------------------------------------------------------------------------------------------------------------------------------------------------------------------------------------------------------------------------------------------------------------------------------------------------------------------------------------------------------------------------------------------------------------------------------------------------------------------------------------------------------------------------------------------------------------------------------------------------------------------------------------------------------------------------------------------------------------------------------------------------------------------------------------------------------------------------------------------------------------------------------------------------------------------------------------------------------------------------------------------------------------------------------------------------------------------------------------------------------------------------------------------------------------------------------------------------------------------------------------------------------------------------------------------------------------------------------------------------------------------------------------------------------------------------------------------------------------------------------------------------------------------------------|------------------------------------------|---------------------|
| Atoya Adams, MD, MBA    | Miriah Campbell, Eric Miller, Daisy Langarica, Alia Bober, Diana Giraldo                                                                                                                                                                                                                                                                                                                                                                                                                                                                                                                                                                                                                                                                                                                                                                                                                                                                                                                                                                                                                                                                                                                                                                                                                                                                                                                                                                                                                                                                                                                                                                           | AB Clinical Trials                       | Las Vegas, NV       |
| Michael Ryan Adams, MD  | Leslie Iverson, Andryelle Toledo, Melinda Bullington, Alicia Hanten, Carolyn Taylor, Shannon Wright, Chase Carnahan, Rachel Law, Natalie Smith, Julie Taylor, Jared-Robert Blake, Stefanie Vasconez, Courtney Jensen                                                                                                                                                                                                                                                                                                                                                                                                                                                                                                                                                                                                                                                                                                                                                                                                                                                                                                                                                                                                                                                                                                                                                                                                                                                                                                                                                                                                                               | Synexus Clinical Research                | Murray, UT          |
| Leland N. Allen III, MD | Leslie Anne Edwards, William Simpson Davis, Jr., Ronald Meza, Jordan Stauffer, John Farringer, Faith Holmes, Rhonda Buzbee, Cristina Velez, Huse Lisa, Lisa Huse, Camelia Speegle, Gregory Prestage, Mary Perez, Jessica Space, Matthew Todd, Jessica McDowell, Marha Bunnell-Pollak, Jackie Ziegler, Jasmine Ali, Dumitru Sirbu, Kellie Williams, Logan Sawyer, Richelle Chambliss, Samantha Blackmon, Stephanie Brennan, Tiffany Gibbs, Alexandria Anderson, Caitlin Roll, Candace Robinson, Zachary McCoy, Jessica Bartlett, Kimberly Cornelison, Chris Bovell, Vincent Baglini, Christy Greenhalgh, Jessica Maria Mena, David House, Matt Honold, Esteban Zurita                                                                                                                                                                                                                                                                                                                                                                                                                                                                                                                                                                                                                                                                                                                                                                                                                                                                                                                                                                               | St. Vincent's Health System              | Birmingham, AL      |
| Evan J. Anderson, MD    | Kathleen Stephens, Francine Dyer, Maya Stagg, Aaliyah Carron, Austin Lu, Julia Barton, Sy Tran, Leisa Bower, Esther Park, Jianguo Xu, Rebecca Gonzalez, Vy Ngo, Mike Shepard, Lezly Roxxette Zepeda, Karen Sytsma, Sandra Rojas-Honan, Felicia Glover, Susan Rogers, Theda Gibson, Christina A. Rostad, Andres Camacho-Gonzalez, Teresa Ball, Satoshi Kamidani, Mehgan Farah Teherani, Vikash Patel, Etza Peters, Peggy Kettle, Lisa Macoy, Cindy Lubbers, Amber Samuel, Laila Hussaini, Kathryn Zaks, Caroline Ciric, Meg Taylor, Oliver Smith, Amy Muchinsky, Sydney Biccum, Laura Clegg, Dean Kleinhenz, Angelle Ijeoma, Hannah Huston                                                                                                                                                                                                                                                                                                                                                                                                                                                                                                                                                                                                                                                                                                                                                                                                                                                                                                                                                                                                          | Emory University School of Medicine      | Atlanta, GA         |
| Lindsey Baden, MD       | Xhoi Mitre, Jon Gothing, Bruce Bausk, Jessica Cauley, Natalie Izaguirre, Lewis Novack, Michael Seaman, Katherine Yanosick, Henry Rutherford, Junghyun Kim, Dominique Betterbed, Kathleen Garvey, Lauren Clore, Alexander Mills, Deepesh Duwadi, Alessandra Setaro, Kyl Bowman, Kevin McManus, Sidali Beriane, Fadi Ghantous, Christy Lavine, Jasper Ophel, Joseph Sapiente, Jessica Dorning, Tessa Speidel, Lauren Garneau, Robert Dannemiller, Kirquonique Rolle, Muliika Chhorn, Bailey McCarthy, Hana Flaxman, Milenko Tanasijevic, Cameron Nutt, Javier Barria, Andre Avila-Paz, Buteau Malhaika, Tong Alexandra, Tenaizus Woods, Bethany Evans, Hannah Jin, LaKeisha Gandy, Stephanie St. Pierre, Carolyn Darcy, Michael Corrado, James Maguire, Adetoun Okenla, Tamara Roldon Sevilla, David Kubiak, Cassandre Titus, Movita Harrigan, Maria Alvarado, Rose Theodat, Amy Sherman, Laura Platt, Kirsten Goodman, Laura Nicholson, Wilfredo Matias, Emily Koleske, Ruth Rodriguez, Nicole Taikoff, Jun Bai Park Chang, Julia Klopfer, Phoebe Cunningham, Elizabeth Sampson, Karen Magsipoc, Maureen Macgowan, Lauren Donahue, Haley Schram, Noah Abasciano, Megan Powell, Janet Morgan, Yazed Alsowaida, Olivia Riccardi, Neha Limaye, Virginia Loudermilk, Austin Kim, Kevin Zinchuk, Caitlin Grant, Charles Kelly, David Mellace, Jamie Myers, Erika Gribb, Jose Licona, Monica Feeley, Stephen R Walsh, Jennifer A Johnson, Ann Woolley, Alexis Liakos, Jane Kleinjan, Jon Gothing, Nicolas Issa, Michael Desjardins, Raphael Dolin, Alka Patel, Opeyemi Talabi, Christin Price, Paulette Chandler, Elizabeth W Karlson, Allison P Moriarty | Brigham and Women's Hospital             | Boston, MA          |
| Bindu Balani, MD        | Smith Kerowyn, Sergio Garcia, Charo Valdez, Shelly Chin, Caitlin DiBello, Silvia Lara, Chika Ekweghariri, Abena Roberts, Abimbola Coker, Marie-Therese Estanboul, Greg Eskinazi, Michael Tortoriello, Jay Elkareh, Meral Karakoc, Olga Spathis, Patrice Hassoun, Carolene Stephenson, Steven Sperber, Kaur Harveen, Cristina Cicogna, Ciaran Mannion                                                                                                                                                                                                                                                                                                                                                                                                                                                                                                                                                                                                                                                                                                                                                                                                                                                                                                                                                                                                                                                                                                                                                                                                                                                                                               | Hackensack University Medical Center     | Hackensack, NJ      |
| Mira Baron, MD          | Pamela Kane, Maria Bermudez, Shannen Seversen, Mara Kryvicky, Julia Lord, Terri Barr, Daisy Acevedo, Elena Acosta, Delta Anderson, Alexandra Arango, Anne Bauer, Joshua Egbehor, Tim Flanary, Audrey Haber, Carol Henao, Patti Isaacson, Peter Jacob, Sakaiya Jackson, Karen Kodes, Ludovic La-Branche, Kimarie Lee-Russell, Carol Liso, Cristina Liso, Stephanie Morse, Michelle Navarrette, Christy Norcross, Nora Norcross, Annette Pitts, Mary Sergalis, David Scott, Tytiana Spearman, Danielle Theodore, Brian Thomas, Jennifer Torres                                                                                                                                                                                                                                                                                                                                                                                                                                                                                                                                                                                                                                                                                                                                                                                                                                                                                                                                                                                                                                                                                                       | Palm Beach Research Center               | West Palm Beach, FL |
| Judith Borger, DO       | Jennifer Angell, Nicole Austin, Deanna Benz, Lucian Cappoli, Nicole Davis, Lynn Eckert, Kathryn Hostetter, Stephanie Keating, Jeanette Mangual-Coughlin, Avia McClain-Stockler, Ifeanyi Momodu, Cheryl Norris, Brennan Opanasenko, Stacey Saldua, Nafisa Saleem, Amy Sheets, Ryan Starr, Scott Syndergaard, Jennifer Thomas, Michelle Wallace, Jeffery Pemberton, Mitchell Arildsen, Dan Tomita                                                                                                                                                                                                                                                                                                                                                                                                                                                                                                                                                                                                                                                                                                                                                                                                                                                                                                                                                                                                                                                                                                                                                                                                                                                    | Carolina Institute for Clinical Research | Fayetteville, NC    |
| Paul Simon Bradley, MD  | Taja Adams, Stephanie Ailey, Kira Bell, Shanice Bennett, Vincent Bernades, Jim Callis, Bounphone Chanthavong, Taryn Collett, Anne Crouch, Shannon Davis, Morgan Deal, Mimi Duncan, Brandon Essink, Laura Falcone, Debra Gabrielson, Brooke Halpern, Anyfa Hanna, Cassie Heisey, Dawn Kalloniatis, Andrew Kimball, Jeanette Lee, Amanda Lilienthal, Ginny McNew, Crystal Neely, Kay Lynn Olmsted, Nicole Osborn, Chevon Roberts, Pechoka Sanders, Cynthia Seedorf, Kathryn Stoddard, Jonathan Whelan, Stella Yoon                                                                                                                                                                                                                                                                                                                                                                                                                                                                                                                                                                                                                                                                                                                                                                                                                                                                                                                                                                                                                                                                                                                                   | Meridian Clinical Research               | Savannah, GA        |

| Principal Investigator       | Study Team                                                                                                                                                                                                                                                                                                                                                                                                                                                                                                                                                                                                                                                                                                                                                                                           | Institution                                            | Location           |
|------------------------------|------------------------------------------------------------------------------------------------------------------------------------------------------------------------------------------------------------------------------------------------------------------------------------------------------------------------------------------------------------------------------------------------------------------------------------------------------------------------------------------------------------------------------------------------------------------------------------------------------------------------------------------------------------------------------------------------------------------------------------------------------------------------------------------------------|--------------------------------------------------------|--------------------|
| Adam Benson Brosz, MD        | Rhonda Richter, Debra Gabrielson, Kayla Flege, Ashley Bell, Karen Jo Johnson, Paul Cramer, Jessica Stanton, Andrea Clement, Whitney West, Laura Falcone, Amanda Friesz, Kathy Osborne, Summer Tophoj, Kimber Breeden, Susan Newman, Douglas Herbek, Lindsey Mettenbrink, Luke Friesen, Alison Pierce                                                                                                                                                                                                                                                                                                                                                                                                                                                                                                 | Meridian Clinical Research                             | Grand Island, NE   |
| Abram Burgher, MD            | Stephanie Catanzaro, Shauna Harrell, Magen Hess, Nate Alderson, Bettie D'Nise Corcoran, Norma Frederick, Adrian Alejo, Brian DeCraene, Karen Wakefield, Scarlett Hammett, Susan DeCraene, Ann Marie Milliken, Neil Pearson, Donald Terral Harper                                                                                                                                                                                                                                                                                                                                                                                                                                                                                                                                                     | Hope Research Institute                                | Phoenix, AZ        |
| Thomas B. Campbell, MD       | Andrew Lauria, Jenelynn Kimble, Steven Johnson, Matin Krsak, Andrew Monte, Patrisha Adkins, Michelle Barron, Suzanne Fiorillo, Amy Harrison, Anderson Victoria, Nga Le, Sara Berech, Jose Castillo-Mancilla, Kristine Erlandson, Laurel Ware, Josie Marshall, Stephen Bartlett, Hillary Dunlevy                                                                                                                                                                                                                                                                                                                                                                                                                                                                                                      | University of Colorado Denver, Anschutz Medical Campus | Aurora, CO         |
| Shane Glade Christensen, MD  | Christopher Mickelson, Jessica Shaw, Emily Raming, Amy Nelson, Gabrielle Lewis, Jenessa Folsom, Mikaela Jones, Dylan Owen, Rachel Pugmire, Jennifer Bradley, Anjanette Kemp, Krista Marti, Allyson Christensen, Madison Ellis, Holly Anderson, Emily Bloomquist, Ross Brunetti, Thomas Conner, Jr., Gina Cox, Diana Grazulis, Wesley Lewis, James Longe, Christopher Matich, Bryan Nelson, Sarah Scott, John Witbeck, Stephen Wood                                                                                                                                                                                                                                                                                                                                                                   | J. Lewis Research                                      | Salt Lake City, UT |
| Laurence Chu, MD             | Jennifer Bacchi, Maria Barrientes, Lamar Box, Christian Casas, R. Michelle Chouteau, Katherine Davis, Tandra Dora, Cindy Duran, Pamela Fidler, Ruth Fitch, Brooke Harris, Isaiah Knight, Jennifer Leyva, Michelle Listz, Jennifer Montes, Javier Perez, Jessica Ruff, Dean Skiles, Sean Turnbow, Francesca Vigil, Breana Wade, Kelly Weber                                                                                                                                                                                                                                                                                                                                                                                                                                                           | Benchmark Research                                     | Austin, TX         |
| Jesse L. Clark, MD           | Sandy MacNicoll, Somaieh Talebi, Timothy Hall, Steven Shoptaw, Emery Chang, Michael Li, David Goodman, Paul Adamson, Oladunni Adeyiga, Inez Bentancourt, Susan Reed, Christopher Blades, Jasmin Tavares, Demetria Villanueva, Simone Riley, Jonathan Veloz, Schuyler Thomas, Will Hernandez, Jennifer Baughman, Mitchell Stern, Michele Vertucci                                                                                                                                                                                                                                                                                                                                                                                                                                                     | University of California, Los Angeles                  | Los Angeles, CA    |
| Michael J. Cotugno, MD       | Kyra Lawson, Kim Harper, Edwin Adamson, George H. Bauer Jr., Julie Bilich, Brenda Lawson, Brandon Illickal, Lois Eaglin, Heather Salisbury, Jeff Segner                                                                                                                                                                                                                                                                                                                                                                                                                                                                                                                                                                                                                                              | Benchmark Research                                     | Metairie, LA       |
| Clarence Buddy Creech II, MD | Shanda Phillips, Naomi Kown, Katherine Sokolow, Wendy Winn, Katherine Wright, Shannon Walker, Stephanie Rolsma, Anna Gallion, April Hanlotxomphou, Deborah Myers, Robert Adkisson, Natalia Jimenez, Cindy Trimmer, Roberta Winfrey, Matthew Donio, John Oleis, Donna Torr, Shelly McGehee, Robert Samuels, Sandra Yoder, Eric Brady, Isaac Thomsen, Madeleine Guy, Emma Alexander, Lana Howard, Krisha Alexander, Shane Moore, Tacora Wright, Tara Evans, Ursula Powell, Jenna Caserta, Valerie Mitchell, Meryk Moore, Melissa Lehman, Diane Anders, Constance Dotye, Crystal Rice, Lamar Bowman, Sherri Hails, Monique Bennett, Nicki Soper, Leigh Howard                                                                                                                                           | Vanderbilt University Medical Center                   | Nashville, TN      |
| Joseph D. Davis, MD          | Sandra Kelman, Sandra Braden, Sabrina Bolland, Mia Munoz, Jose Barocio, Brendan Levy, Dhvani Shah, Neil Pearson, Stephanie Catanzaro, Nathan Alderson, Susan DeCraene, Maureen Godfrey, Skyla Clark                                                                                                                                                                                                                                                                                                                                                                                                                                                                                                                                                                                                  | Hope Research Institute                                | Chandler, AZ       |
| Luis I. De La Cruz, MD       | Amy Ford, Taylor Wilson, Cindy Smith, Austin Lambert, Erin Zeiler, Kaelyn Rowland, Marlee Smith, Suzanna Studdard, Zandra Hamilton, Meredith Benfield, Sara Poff, David Godwin, Elizabeth Everette, Steven Clemons, Kayla Peay, Stephanie Gilreath                                                                                                                                                                                                                                                                                                                                                                                                                                                                                                                                                   | VitaLink Research                                      | Greenville, SC     |
| Douglas Scott Denham, DO     | Thomas Weiss, Parke Hedges, Ayoade Avworu, Kay Scroggins, Leisel Koerber, Antonio Gutierrez, Nathan Cortez, Andrea Gomez, Darlington Akahara, Michelle Smith, Kristy Trevino, Beatriz Herrera, Shaiane Dickerson, Kerry de Jesus, Matthew Korte, Cynthia Ramos, Reanna Martinez, Erica Leal, Shakera Flores, Paul Esparza, Brian Hemming, Melinda Axton, D'Andre White, Terri Perez, Carolina Coronado, Rebecca Many, Clayton Stone, Kimberly Evans, Anshumaan Maharaj, Stephen Brick, Steffanie Barrera, Staci Poettgen, Dawn Killian, Gerardo Pena, Karol Perez, Victoria Hernandez, Kevin Martinez, Amy Griffith, Nolan Payton, Quincey Hogue, Jamie Padilla, Emily Mendez, Lily Hays, Maristelle Co, Nicholas Trinidad, Ismael Rodriguez, Amy Lewis, Cindi Nellis, Lele Simmons, Marissa Johnson | Clinical Trials of Texas                               | San Antonio, TX    |
| David Joseph Diemert, MD     | Linda Witkin, Aimee Desrosiers, DeEnna Wedding, Bertran Walton, LaKeisha Queen, Ryan Mouton, Caroline Thoreson, Manya Magnus, Jennifer Wald, Erika Faust, Nicholas Heredia, Robbie Kattappuram, Hira Qadir, Chelsea Ware, Hannah Yellin, Kegan Dasher, Daniel Mullen, Jeanne Jordan, Taylor Ladson, Madison Lintner, Kaitlyn Macnair, Bitana Saintilma, Kelly Thomas, Samantha Walker, Neha Rampally, Madhu Balachandran, Elissa Malkin, David Parenti, Hana Akseled, Marc Siegel, Gary Simon, Afsoon Roberts, Aileen Chang                                                                                                                                                                                                                                                                          | George Washington University                           | Washington, DC     |

| Principal Investigator     | Study Team                                                                                                                                                                                                                                                                                                                                                                                                                                                                                                                                                                                                                                                                                                                                                                                                                                                  | Institution                             | Location         |
|----------------------------|-------------------------------------------------------------------------------------------------------------------------------------------------------------------------------------------------------------------------------------------------------------------------------------------------------------------------------------------------------------------------------------------------------------------------------------------------------------------------------------------------------------------------------------------------------------------------------------------------------------------------------------------------------------------------------------------------------------------------------------------------------------------------------------------------------------------------------------------------------------|-----------------------------------------|------------------|
| Susanne Doblecki-Lewis, MD | Maria Luisa Alcaide, Jose Gonzalez-Zamora, Stephen Morris, Yimy Puerto, Annie Salvarrey, Claudia Balgas, Claudia Santos, Katherine King, Brahian Steven Erazo, Mayra Fernandez, Leopoldo Cordova-Garcia, Elisa Corzo-Sanchez, Edgar Fernandez, Loreta Padron, Stefani Ann Butts, Kenia Moreno, Juan Casuso, Maria de Pilar Valanzasca, Thomas Tanner, Marilyn Fernandez, Mary Aloise, Inza Patton, Vivian Pastrana, Sendy Puerto, Irma Barreto Ojeda, Junlin Long, Barbara Huang, Gilianne Narcisse, Vanessa Perez                                                                                                                                                                                                                                                                                                                                          | University of Miami                     | Miami, FL        |
| Matthew W. Doust, MD       | Denise Sample, Sandra Erickson, Nate Alderson, Adrian Alejo, Stephanie Catanzaro, Susan DeCraene, Cassie Enrico, Sandra Erickson, Alex Guereque, Shauna Harrell, Shana Harshell, Stephanie Junker, Stephanie Laufenberg, Madison Mikulak, Makayla Morra, Nicole Olson, Neil Pearson, Jasmin Redden, Monique Romo, Denise Sample, Dhvani Shah, Sahara Vega, Emma Kar                                                                                                                                                                                                                                                                                                                                                                                                                                                                                         | Hope Research Institute                 | Phoenix, AZ      |
| Valentine Mbepson Ebu, MD  | Elwaleed Elnagar, Georgette Ebu, Genevieve Iwuala, Catina Adams, Marissa Cervenka, Ezgar Del Real, Shraddha Dubal, Elwaleed Elnagar, Jenifer Fiette, Kathy Harrell, Genevieve Iwuala, Vicki Martinez, Robert Miranda, Brennan Opanasenko, Destiny Robinson, Liz Ruiz, Amy Sheets, Shoniece Wallace                                                                                                                                                                                                                                                                                                                                                                                                                                                                                                                                                          | WR-Global Medical Research              | Dallas, TX       |
| Frank Steven Eder, MD      | Ryan Little, Victoria Engler, John Tarbox, Heather Rattenbury-Shaw, Deborah Hubish, Jessie Taylor, Debra Gabrielson, Jessica Fellows, Jennifer Molstead, Kathe Olmstead, Ashley Conover, Tammy Kohn, Chelsea Briar, Corrine Young, Collen McVannan, Kelli Quick, Shaylyne Hubanks, Kimber Breeden, Ann Marie Sampson, Traci Hull, Tarin Gordon, Susan Owen, Kate Macarak, Tonya Rackett, Jacob Blattstein, Partidge Jane Aton, Nicole Croft, Carolyn Grausgruber, Rebecca Miller, Ryan Little, Victoria Engler, John Tarbox, Heather Rattenbury-Shaw, Nathan Kimball, Courtney Heisey, Ginny McNew, Abigail Wine, Cindi VanKuren, Jared Frick, Tammy Dennis, Andrew Kimball                                                                                                                                                                                 | Meridian Clinical Research              | Binghamton, NY   |
| Hana M. El Sahly, MD       | Jennifer A. Whitaker, C. Mary Healy, Christine Akamine, Wendy A Keitel, Robert L Atmar, Annette Nagel, Sandra Francisco, Thea Marie Cordero, Janet Brown, Jennifer Christensen, Caroline Doughty-Skierski, Connie Rangel, Carrie Kibler, Coni Cheesman, Lisreina Toro, Chanei Henry, Chianti Wade Bowers, Pedro Piedra, Kathy Bosworth, Kayla Burrell, Jesus Banay, Tykel Eddy, Trent Davis, Shetel Anassi, Yvette Rugeley, Olga Rybina-Willis                                                                                                                                                                                                                                                                                                                                                                                                              | Baylor College of Medicine              | Houston, TX      |
| David Jon Ensz, MD         | Pamela Allen, Taylor Bergh, Kimber Breeden, Avery Dunn, Brandon Essink, Debra Gabrielson, Rylea Gulick, Tavane Harrison, Courtney Heisey, Andrew Kimball, Shelby Klaschen, Jessica Knight, Makayla Langston, Meagan Miller, Allie Oplinger, Heather Persinger, Alison Pierce, Kathryn Stoddard, Kayla Sturgeon, Jamie Thompson, Melissa Wiseman                                                                                                                                                                                                                                                                                                                                                                                                                                                                                                             | Meridian Clinical Research              | Dakota Dunes, SD |
| Brandon James Essink, MD   | Jay Meyer, Frederick Raiser, Kimberly Mueller, Roni Gray, Riley Brockman, Tabitha Campbell, Carrie Essink, Laura Falcone, Roni Gray, Linda Layton, Jay Meyer, Kimberly Mueller, Tiffany Nemecek, Frederick "Fritz" Raiser, III, Jessica Satorie, Chelsea Steinmetz, Nicole Osborn, Cassie Heisey, Maria Nguyen                                                                                                                                                                                                                                                                                                                                                                                                                                                                                                                                              | Meridian Clinical Research              | Omaha, NE        |
| Gregory J. Feldman, MD     | May-Yin Suen, Brittany Cooksey, Madison Fowler, Sarah Chynoweth, Gary Clemons, Laura Jolly, Charlie Jordan, Heather Allison, Steve Clemons, Amber Brittany Belcher, Allison Kelly, Marsha Gossett, Wendy Taylor, Amy Witt, Kendal Nelson, Jeffrey Witt, Jacqueline Muenzner, Elizabeth Everette, Supinder Channa, Allison Ayers, Joseph Boscia, Farhan Siddiqui                                                                                                                                                                                                                                                                                                                                                                                                                                                                                             | VitaLink Research-Spartanburg           | Spartanburg, SC  |
| Carl J. Fichtenbaum, MD    | Maggie Powers-Fletcher, Michelle Saemann, Sharon Kohrs, Kimberly Mullins, Lindsay Davis, Moises Huaman, Angela Snyder, Kristin Weghorn, Brenda Miller, Elizabeth Costea, Lisa Schira, Romana Saeed, Helen Shelton, Kathleen Ballman, Laura Browning-Cho, Sherry Donaworth, Chris Goddard, Jeanine Goodin, Elizabeth Niederegger, Lisa Hachey, Tamara Maus, Pam Fletcher, Makayla Bishop, Victoria Straughn, Shaina Homer, Carrie Christofield, Dana Burns, Jason Mayes, Kelly Windholtz, Lisa Proffitt, Faizan Qureshi, Michelle O'Neil, Arustamyan Lisa, Sarah Trentman, Eva Whitehead, Jennifer Baer, Linda Hinds, Jaasiel Chapman, D'Vaughn House, Gary Frazier, Judy Houston, Lisa Altenau, Mary Burns, Dorice Smith, Justin Ragle, Eric Mueller, Cynthia Nypaver, Jaime Robertson, Anissa Moussa, Geronimo Fera Garzon, Sierra Bennett, Marlana Petrie | University of Cincinnati                | Cincinnati, OH   |
| Carlos A. Fierro, MD       | Mazen Zari, Celia Gonzalez, Natalia Leistner, Mary Easley, Mary Provost, Krista Estrada, Ann Geier, Amy Thompson, Heather Barker, Karol Moore, Kelly Moen, Monica Atwood, Amber Wolf, Brandi Dickerson, Manyohn Rinehart, Dina Hammine, Angela Eichler, Casey Johnson, Nathan Arthur                                                                                                                                                                                                                                                                                                                                                                                                                                                                                                                                                                        | Johnson County Clin-Trials              | Lenexa, KS       |
| Veronica G. Fragoso, MD    | Lisa Holloway, Cecilia McKeown-Bragas, Teresa Becker, Vicki Miller, Leena Mir, Elton Oliveira, Moez Talpur, Enya Rentas-Sherman, Gabriela Maria Becerra, Dewayne Hicks, Robert Krbashyan, Shakira Barr, Ashraf Jafri, Herman Ortiz, Zohair Harianawala, Chandra Tobin, Norma Gonzalez, Saji Perinjilil, Khorshid Amirhosravi, Tracy Kowalski, Biman Goswami, Waheeda Sureshbabu, Amy Anderson, Berenice Ferrero, Simeen Khan, Chen-Ho Yang, Nazanin Zarinkamar, Scott Ward, Crystal Reese, Miyosha Lewis, Olga Konshina, Lorrian Yates, Joel Cano, Quiana Wilson, Kara                                                                                                                                                                                                                                                                                      | Texas Center for Drug Development, Inc. | Houston, TX      |



| Principal Investigator       | Study Team                                                                                                                                                                                                                                                                                                                                                                                                                                                                                                                                                                                                                                                                                                                                                                                                                                                                                                                                                                                                                     | Institution                                 | Location          |
|------------------------------|--------------------------------------------------------------------------------------------------------------------------------------------------------------------------------------------------------------------------------------------------------------------------------------------------------------------------------------------------------------------------------------------------------------------------------------------------------------------------------------------------------------------------------------------------------------------------------------------------------------------------------------------------------------------------------------------------------------------------------------------------------------------------------------------------------------------------------------------------------------------------------------------------------------------------------------------------------------------------------------------------------------------------------|---------------------------------------------|-------------------|
|                              | Sikes, Diana Chehab, Joanna Quezan, Maryam Rabbani, Sadaf Batla, Abbyssinia Moges. Diego Carrington, Matthew Joseph, Laura Grissanty, Dean Jang, Dustin McFadden, Misbah Baloch, Elisa Moralez, Abdeali Dalal, Frances Saubon, William Fernandez, Jenny Toress, Blessing Felix, Zain Rizvi                                                                                                                                                                                                                                                                                                                                                                                                                                                                                                                                                                                                                                                                                                                                     |                                             |                   |
| Ian Frank, MD                | Annet Davis, Eileen Donaghy, Nicole Sundo, Juan Ramirez, Laura Schankel, Dana Brown, Katharine Bar, Dana Brown, Christopher Chianese, Gillain Constantino, Dovie Watson, Kathleen Degnan, Helen Koenig, William Short, Petra Alexander, Eileen Mergliano, Jie Ho, Michele Wisniewski, Debora Dunbar, Liani Santini-Lopez, Rosemarie Kappes, Angela Cabassa, Tammy Chen, Berry SotoVega, Deborah Kim, Devon Cliett, Kate Kearns, Jillian Baron, Vivian Leung, Florence Momplaisir, Sarah Wood, Tameka Matthews, David Metzger, Richard Tustin                                                                                                                                                                                                                                                                                                                                                                                                                                                                                   | University of Pennsylvania                  | Philadelphia, PA  |
| Sharon E. Frey, MD           | Irene Graham, Getahun Abate, Daniel Hoft, Heather Douds, Cassandra Zehenny, Joan Siegner, Helay Hassas, Kim Cooper, Shirley Dettlebach, Sabrina DiPiazza, Carol Duane, Linda Eggemeyer-Sharpe, Lauren Foreman, Jerry Hutter, Ryan Kerr, Kate Liefer, Tracy Montauk, Karla Mosby, Janice Tennant, Nicole Purcell, Kiana Wilder, Kathleen Chirco, Sharon Irby-Moore, Kathleen Koehler, Melissa Loyet, Thomas Pacatte, Susan Stewart, Azra Blazevic, Tamara Blevins, Chase Colbert, Christopher Eickhoff, Lainey Mejia Jauregui, Keith Meyer, Krystal Meza, Amanda Nethington, Huan Ning, Brittany Williams, Mei Xia, Yinyi Yu, Stanley Dublin, Mary Pat Eastman, Eric Eggemeyer, Mikayla Frye, Michelle Harris, Aleshia McCoy, Donna Duncan, Gwendolyn Tatum, Nicole Purcell, Kiana Wilder, Tammy Grant, Claudia Castillo Paredes, Rong Hou, Jin Wang, Qian Wang, Sarah George                                                                                                                                                   | Saint Louis University                      | St. Louis, MO     |
| Cynthia Gay, MD              | David Wohl, Joseph Eron, Jr., , Janette Goins, Ulrike Adam, Ekundayo Nylander-Thompson, Anna Furlong, XinHong Ao, Kathy Guerrero, Melinda Hart, Kathleen Loeven, Rachael Mossey, Esther Speight, Rachel White, Chloe Twomey, Kristen Gray, , Patti Vasquez, April Welch, Camille O'Reilly, Maureen Furlong, Noshima Darden-Tabb, Elizabeth DuBose, Marie Oriol, Dynesha Perry, Maria Stetson, Maria Bullis, Shelby Turner, Ebony Harrington, Alexander Bradley, Susan Pedersen, Becky Straub,Sandra Bamhart, Tevnan Keller, MandyTipton, Abigail Riddick, Kristi Kirkland, Maggie Harman, Tania Hossain, Centhla Washington, Erin Hoffman, Carolina Pastrana Medina, William Johnson, Samantha Earnhardt, Amy James Loftis, Catherine Kronk, Yaa Ofori-Marfoh, Julie A Nelson, Nicole Maponga, Lina Rosengren-Hovee, William Zhao, Jennifer Thompson, Sarah Law, Holly Milner, Jonathan Oakes, Rachel Cook, Erin Cardot, Oesa Vinesett, Victoria Rucinski, Joy Wannamaker, Tanaily Giralt Smith, Eliza DuBose, Chidinma Okafor | University of North Carolina at Chapel Hill | Chapel Hill, NC   |
| Richard M. Glover, II, MD    | Stacy Slechta, Troy Holdeman, Robyn Hartvickson, Amber Grant, Jennifer Bennett, Lindsey Brewer, Janelle Brown, Kelsey Burden, Melissa Burton, Brianna Burton, Jordan Danby, Sheri Duncan, Amber Grant, Robyn Hartvickson, Lisa Hemmelgam, Sherry Henning, Jeri King, Riley King, Colton King, April Kitterman, Shannen Lassiter, Cayla Lawless, Janna Martinez, Ragene Moore, Marissa Mueller, Aaron Nguyen, Justin Phillips, Jordan Reheis, Rebecca Ring, Katherine Saengerhausen, Shannon Thomas, Dylan Thomas, Cindy Thome, Denae Villines, Amber Wenzel, Eilleen Wilbert, Avi Woods, Caressa Presley, Brianna Newport, Olivia Allen, Miranda Santiago, Cheryl Sauerwein, Jill Longstaff, Sadie Allen, Candace Heckart                                                                                                                                                                                                                                                                                                      | Alliance for Multispecialty Research        | Newton, KS        |
| Gregory Mark Gottschlich, MD | Melissa Gottschlich, Steven Anderson, Gregory Mark Gottschlich II, Mary Woeste, Kate Harden, Cindy Young, Michael Pordy, Audrius Ruksenas, Lacy Baird, Kim Krogman, Lori Stanton, Melissa Fuson, Mason Urban, Christine Watson, Richard Powell, Mary Smith, Jacob Sekinger, Diamond Russell, Nicole Lim, Mylene Asmar-Rios, Yusef Museitif, Craig Mitchell, Tarik Whitham, Zachary Rutledge, Troy Porter, Andrea Newlands, Jami Ramsey, Mary Frances Curry, Nishay Holloman, Crystal Barket, Michelle Spear, Shelley Mahan, Taeleighta Greene, Zachary Eardley, Gen Moussa, Mary Ann Gottschlich                                                                                                                                                                                                                                                                                                                                                                                                                               | New Horizons Clinical Research              | Cincinnati, OH    |
| Sinikka L. Green, MD         | Julie Hamilton, Alex Fuller, Jeanette Dickhaus, Colleen Jacobson, Triny Cooper, Michelle Jackson, Taylor Evans, Tabitha Judd, Kathryn Alexander, Megan Rosallo, Sikhongi Phungwayo, Robin Dotson, Dana Finley, Michael Vasquez, Cyndi Foster, Gregg Lucksinger, Sarah Smiley, Jayasree Krishnankutty, Ray Coon, Grishma Dhimmer, Melanie Wilkerson, Tatum Shawver, Mercedes Coffman, Devin Teal, Laura Crenshaw                                                                                                                                                                                                                                                                                                                                                                                                                                                                                                                                                                                                                | Advanced Clinical Research                  | Cedar Park, TX    |
| Carl P. Griffin, MD          | William Schnitz, Andrea Romero, Kim Hamilton, Raymond Cornelison, Angela Genovese, Shelly Brunson, April Green, Lacey Dietz, Kim Calloway, Chris Hyatt, Destiny Heinzig-Cartwright, Chalimar Rojo, Sharee Wright, Kathi Shaw, Michael Pojezny, Avery Keller, Krystal Hightower, Dalia Tovar, Shanda Gower                                                                                                                                                                                                                                                                                                                                                                                                                                                                                                                                                                                                                                                                                                                      | Lynn Health Science Institute               | Oklahoma City, OK |
| Milton Haber, MD             | Maria Candelario, Martha Bunnell-Pollak, Lauren Wade, Jackie Ziegler, Deena Ramirez, Perla Avalos, Maria Drada, Jasmine Ali, Jessica McDowell, Kehinde Busari, Patricia Church, Ronald Meza, Marco Vela, Esteban Zurita, Chris Connolly, Ruben                                                                                                                                                                                                                                                                                                                                                                                                                                                                                                                                                                                                                                                                                                                                                                                 | Laguna Clinical Research Associates         | Laredo, TX        |

| Principal Investigator    | Study Team                                                                                                                                                                                                                                                                                                                                                                                                                                                                                                                                                                                                                                                                                                                         | Institution                                                              | Location             |
|---------------------------|------------------------------------------------------------------------------------------------------------------------------------------------------------------------------------------------------------------------------------------------------------------------------------------------------------------------------------------------------------------------------------------------------------------------------------------------------------------------------------------------------------------------------------------------------------------------------------------------------------------------------------------------------------------------------------------------------------------------------------|--------------------------------------------------------------------------|----------------------|
|                           | Del Bosque, Alisha Lutat, Chelsea Fleming, Brett Potthoff, Anita Suri, Cynthia Priester, Brenda Hernandez, Veronica Procasky, Eva Cerreta, Matt Honold, Melinda Rodriguez, Maria Regalado, Jordan Stauffer                                                                                                                                                                                                                                                                                                                                                                                                                                                                                                                         |                                                                          |                      |
| Greg Hachigian, MD        | Michael Cancilla, Ricardo Castellanos, Angela Cuellar, Yaman Darmarathne, Shailla Faulker, Yana Gordeyeva, Michelle Hisey, Ashley Jungsten, Kristin Kiersey, Pawandeep Nagra, Nav Nagra-Kooner, Jazmin Nauta, Masaru Oshita, Kenneth Quick, Julie Raygoza, Amanny Sadek, Melisa Tinder, Jhoana Torres, Deborah Murray, Kristen Kiersey                                                                                                                                                                                                                                                                                                                                                                                             | Benchmark Research                                                       | Sacramento, CA       |
| Laurie J. Han-Conrad, MD  | Brandon Baldwin, Lucian Cappoli, Tenisha Garcia, Ella Grach, Brenda Grande, Nicolle Mendez, Natalie Moy, Matthew Musikanth, Karen Mylerberg, Brennan Opanasenko, Mark Pulera, Patti Sanchez-Emerly, Mireles Sarah, Todd Simmons, Denis Tarakjian                                                                                                                                                                                                                                                                                                                                                                                                                                                                                   | WR-Medical Center for Clinical Research                                  | San Diego, CA        |
| Wayne Lee Harper, MD      | Toni Bland, Lori Bridges, Lucian Cappoli, Lisa Cohen, Leah Corts, Annie Craft, James Earnhardt, Lynn Eckert, Aubrey Farray, Laura Hoer, Matthew Hong, Chris Hoyle, Jenee Jiggetts, Brian Joseph, Bradley Killebrew, Kendra Lisee, Lucie Mangala, David Musante, Adnan Nasir, Amanda Olsen, Brennan Opanasenko, Marci Parks, Marion Peoples, Katherine Schuch, Judith Shand, Sabine Ucik, Douglas Wadeson, Barbara Wheeler                                                                                                                                                                                                                                                                                                          | M3 Wake Research                                                         | Raleigh, NC          |
| Ripley R. Hollister, MD   | Jeremy Brown, Brandy Ball, Jeremy Brown, Valerie Dyster, Dalia Jeronimo, Shelby Pickle, Michael Pojezny, Melody Ronk, Kathi Shaw, Bobbi Shofner, Jami Wagner, Meghan York, Jill York                                                                                                                                                                                                                                                                                                                                                                                                                                                                                                                                               | Lynn Institute of the Rockies                                            | Colorado Springs, CO |
| Lisa A. Jackson, MD, MPH  | Marilyn Nguyen, Maya Dunstan, Barbara Carste, Sarah Friend, Diana McFeters, Lynn Gross, Mohamed Ajenah, Jana Fitch, Audra Mccoy, David Skatula, Susan Lasicka, Kimberly Brinker, Karen Sherwin, Melissa Scheer, Paula Lins, Roger Calvert, Roxanne Erolin, Stella Lee, Vi Tran, Stephanie Pimentia, Bruce Douglas, Lee Barr, Colin Fields, Erika Kiniry, Joe Choe, Janice Suyehira, Joyce Benoit, Michael Witte, Rebecca Lau                                                                                                                                                                                                                                                                                                       | Kaiser Permanente Washington Health Research Institute                   | Seattle, WA          |
| Spyros Andrews Kalams, MD | Greg Wilson, Kyle Rybczyk, Katie Crumbo, Carly Griffin, Latoya Hannah, Amy Kerrigan, Valerie Mitchell, Jenna Caserta, Mary Downey, Nicole Swindle, Shonda Sumner, Amber Massey, Trudy Sullivan, Rita Smith, Cindy Nochowicz, Eric Olson, Christian Warren, Josh Simmons, Dana King, Gwendolyn Rees, Matt Donio, Jesse Case, Keith Richardson, Jarissa Greenard                                                                                                                                                                                                                                                                                                                                                                     | Vanderbilt University Medical Center                                     | Nashville, TN        |
| Colleen Kelley, MD, MPH   | Valeria D. Cantos, Sheetal Kandiah, Carlos del Rio, Christina Bacher, Hannah Huston, Juliet Brown, Divya Bhamidipati, Nithin Gopalsamy, Brittany Lynn Speigel, Elizabeth (Betsy) Hall, Brandon Spratt, Kiran Dhillon, Caitlin Moran, Michael Chung, Felecia Wright, Marcia Peters, Rondell Jaggars, Vanessa Soliman, Ron Gaston, Christopher Foster, Sarah Wiatrek, Bezuayehu Mandefro, Pamela Weizel, Pamela Lankford-Turner, Anandi Sheth, John Gharbin, Catherine Abrams, Philip Powers, Paulina Rebolledo, Christin Root, Tiraje Lester, Sha Yi, Damien Swearing, Fred Ede, Isaac Perez, Kelly Likos, Meen Dhir, Aastha KC, Gabriela Georgial, Tucker Colvin, Nabeel Yar Khan, Valarie Hunter, D'Jamel Young, Felecia Atkinson | Emory University Emory University – Ponce de Leon Clinical Research Site | Atlanta, GA          |
| Christina Kennelly, MD    | Jacob Coleman, Brittany Bundeef, Melissa C. Hennessey, Kenneth Owen, Caroline Wilds Wilds, Jennifer Womack, Susan Martello, Chiedza Hooker, Robert Brownlee, Melissa James, Deborah Wesley-Farrington, Lori Whiteheart, Hala Webster, David Framm, Cortney Fretz, Gwyn Gibson, Susan Donahue, Kelly Woodell, Linda McCarty, Jim Vesely, Scott Chatterton, Andrew Ottesen, Enrico Belgrave, Krishna Shah, James Chester Alexander, Brittain Callahan                                                                                                                                                                                                                                                                                | Javara                                                                   | Charlotte, NC        |
| Shishir Kumar Khetan, MD  | Taja Adams, Tanya Alexander, Tanya Alexaner, Sydney Barmoy, Jake Bart, Kira Bell, Ira Berger, Jemario Blackwell, Priscilla Buahin, Bounphone Chanthavong, Juliana DeVito, Azure Erskine, Brandon Essink, Laura Falcone, Debra Gabrielson, Beau Garland, Barb Geiger, Tiana Oliver, Courtney Heisey, Sucharita Katikala, Andrew Kimball, Heather Lang, Jeanette Lee, Asefa Mekonnen, Devan Myers, Kimberly Nieves, Allison O'Brien, Oyebisi Olanrewaju, Nicole Osborn, Adunola Oshiyoye, Rahul Patel, Alan Pollack, April Poole, Collin Smith, Kathryn Stoddard, Chao Wang, Sean Whelan, Jonathan Whelan, Graciela Zapata, Nan Zhai                                                                                                 | Meridian Clinical Research                                               | Rockville, MD        |
| Murray A. Kimmel, DO      | Alexa Diec, Ann Riley, Bette Denmat, Bram Swarr, Christina Raidl, Dania Billman, Denise Dixon, Donald Dawson, Elaine Crudo, James Crowley, Katrina Carlson, Kaylie Worzick, Laura Worth, Lisbeth Gordon, Marion Oliver, Robert Holt, Simmy Pinto, Taylor Atkinson, Traci Mitchell, Lana Ghomrawi, Norma Rokoff                                                                                                                                                                                                                                                                                                                                                                                                                     | Optimal Research                                                         | Melbourne, FL        |
| Judith L. Kirstein, MD    | Jared Bradshaw, Krista Forster, Jeanette Dickhaus, Marcia Bernard, Erica Sanchez, Nikki Abels, Cynthia Kunakom, Vanessa Vandergoot, Jessica Fisher, Carol Remigio, Jourdan Manfred, Frederick Lloyd, Tiffany Williams, Clarisse Baudelaire, Lovette Cherelle, Nolan Mackey, Alan Valenzuela, Theodore Wyman, Alyssa Taber, Karen Myers, Craig Koch                                                                                                                                                                                                                                                                                                                                                                                 | Rancho Paseo Medical Group                                               | Banning, CA          |
| Michael J. Koren, MD      | Shannon Trull, Amanda Elwood, Mary Strickland, Ivy Gulliermo, Chistopher Ganzhorn, Sonia Gerardo, Taylor Johnson, Victoria Kaposchansky, Cassie Lawler, Laura Little, Amanda Pratt, Sheldon Warren, Andrea West, Emery Noles, Nathaniel                                                                                                                                                                                                                                                                                                                                                                                                                                                                                            | Jacksonville Center for Clinical Research                                | Jacksonville, FL     |

| Principal Investigator      | Study Team                                                                                                                                                                                                                                                                                                                                                                                                                                                                                                                                                                                                                                                                                                                                                                                                                                                                                                                                            | Institution                                                      | Location        |
|-----------------------------|-------------------------------------------------------------------------------------------------------------------------------------------------------------------------------------------------------------------------------------------------------------------------------------------------------------------------------------------------------------------------------------------------------------------------------------------------------------------------------------------------------------------------------------------------------------------------------------------------------------------------------------------------------------------------------------------------------------------------------------------------------------------------------------------------------------------------------------------------------------------------------------------------------------------------------------------------------|------------------------------------------------------------------|-----------------|
|                             | Grant, Jillian Agnew, Lori Alexander, Brenda Anderson, Deirdre Arrington, Sara Benner, Lisa Carl, Allison Crain, Nafisa Ishaku, Robert Nix, Sharon Smith, Amber Devries, Sandy Salceiro, Opara Chukwudi, Mikaela Karney-Trull, Ramil Castillo, David Graham, Gail Lowe, Alexander Hill, Carolyn Tran, Jeffrey Jacqmein, Darlene Bartilucci, Alpa Patel, Janet Garvey, Mitchell Rothstein, Kenneth Aung-Din, Margaret Gannaway, Arman Mughal, Sandra Fuit, Jolene Wolfer, Erin Schelhorn, Jacob Wolfer, Madison Martinez, Melissa Parks, Patricia Neal                                                                                                                                                                                                                                                                                                                                                                                                 |                                                                  |                 |
| Karen L. Kotloff, MD        | Matthew Laurens, Milagritos Tapia, Lisa Chrisley, Cheryl Young, Barbara Albert, Robin Barnes, Shernel Barrett, Andrea Berry, Melissa Billington, Shannon Bittner, Colleen Boyce, Faith Pa'Ahana Brown, James Campbell, Regina Carpenter, Jamonie Carter, Ginny Cummings, Brenda Dorsey, Jorge Flores, DeAnna Friedman-Klabanoff, Shirley George, Nancy Greenberg, Hassan Haji, Elizabeth Hammershaimb, Susan Holian, Leslie Howe, Myounghee Lee, Alyson Kwon, Kirsten Lyke, Alma Valle Maldonado, Jennifer Marron, Kaitlin Mason, Monica McArthur, Rosa McBryde, Sherry McCammon, Sandra Molina, Kathleen Neuzil, Daniele Nitkowski, Justin Ortiz, Rekha Rapaka, Mardi Reymann, Toni Robinson, Wanda Somrajit, Mark Travassos                                                                                                                                                                                                                         | University of Maryland, School of Medicine                       | Baltimore, MD   |
| Mark E. Kutner, MD          | Amanda Colina, Isett Caro, Frances Beltran, Jessie Downs, Jonathan Fernandez, Mariete Renden, Miraya Mujica-Alabaci, Susel Figueredo, Yanelis Dominguez, Jaime Blandon, Bryan Ruiz, Leidy Montoya, Edgardo Rodriguez, Jessie Downs, Jason Rothschild, Janett Acle, Yaime Martinez, Soraya Ricardo, Maria Hernandez Moran, Eloisa Guerra, Heidie Perez, Claudia Rodriguez, Victoria Moreno, Vanessa Hechavarria, Saray Carvajal, Daniel Lopez, Carlos Iviricu, Neiner Enriquez, Paola Garcia, Chris Hoyle, Marianela Carvajal, Janet Mendez, Edisleidy Mesa, Marco Ramirez, Dalila Del Valle, Jennifer Ortega, Yeni Hernandez, Jhobana Vargas, Carmen Amador, Juan Delgado, Maury Santos, Meredith Arguelles, Leyanis Coello, Vanessa Ansorena, Jorge Caso, Stacy Machado, Raydel Valdes, Giann Lightbourn, Dayami Davales, Alain Chang                                                                                                                | Suncoast Research Group                                          | Miami, FL       |
| Mimi Van Der Leden, MD, PhD | Chrishea Harvey, Tricia Oyeyemi, Aicha Moutanni, Stephanie Melton, Peta-Gay Jackson Booth, Jennifer Yoon, Gloria Kim, Atanas Filev, Francis Uwandi, Meyling Lopez, Janice Spreitzer, Courtney Gennes, Xiangfei Cheng, Matthew Van Sickle, Nick Bart, Brianne Okunji, Frank Maloba                                                                                                                                                                                                                                                                                                                                                                                                                                                                                                                                                                                                                                                                     | Optimal Research                                                 | Rockville, MD   |
| Michael L. Levin, MD        | Brennan Opanasenko, Yajaira Ramos, Shonda Lester, Rebecca Boucher, Shawn Harell, Shon Boucher, Patti Sanchez, Nina Scharbach, Alex Sanchez, Shyane Raniello, Wendy Guerra, Krystal Tyner, Kimberly Temple, Ruby Ortiz, Daniel Terreault, Amy Kill, Jade Odynski, Adolfo DeLeon, Debbie Carter, Eduardo Rodriguez, Julia Gass, Sara Esparza, Sierra Dansbee, Tammy Harrison, Marcy Kulic, Lucian Cappoli, Mora Kim, Matthew Fenner, Heather Jimenez, Shraddha Dubal, Julie Hussey                                                                                                                                                                                                                                                                                                                                                                                                                                                                      | WR-Clinical Research Center of Nevada                            | Las Vegas, NV   |
| Michael Lewis, MD           | Nancy Mohler, Mai Pham, Ron Waldorf, Elham Ghadishah, Samantha Feril, Stella Lee, Dzuyen Nguyen, Ruoxiang Wang, Justine Velandria, Benjamin Dreskin, Joseph Yusin, Lauren Vigil, Sara Wong, Suchi Tiwari, Joseph Pisegna, Sunita Dergalust, Wayman Lee, Krissa Caroff                                                                                                                                                                                                                                                                                                                                                                                                                                                                                                                                                                                                                                                                                 | VA Greater Los Angeles Healthcare System                         | Los Angeles, CA |
| Gregg H. Lucksinger, MD     | Jaleh Ostovar, Craig Koch, Danuel Hamlin, Kelly Chase, Jeanette Dickhaus, Edward Kerwin, Frederick Forde, Allison Alvord, Dawn Stewart, Dan Hamlin, Kevin Parks, Ryan Israelsen, Kary Kelly, Tiffany Smith, Melissa Myers, Ryan Rackley, Audrey Kuehl, Savannah Peterson, Hannah Hall, Jay Weisbart, Alison Dodenhoff, Emily Kelly                                                                                                                                                                                                                                                                                                                                                                                                                                                                                                                                                                                                                    | Velocity Clinical Research                                       | Medford, OR     |
| Mary Beth Manning, MD       | Carol Salango, Alec Ireland, Lisa Hoagland, Jeanette Dickhaus, Toby Briskin, Joan Rothenberg, Michael Gaston, Sharita Tedder-Edwards, Denise Roadman, Megan Sokolowski, Tina Shickluna, Katherine Bielanski, Samantha Hood, Talia Chandler, Brianna Arman, Melinda DeLong, Naqib Ahmad, Karly Tarase, Jade Svoboda, Lisle Merriman, Melisa Sebera, Emma Landskroner, Amy Maroun, Brooke Glivar, Jennifer Gaston, Sarah Dzigiel, Cassandra Uminski, Karol Sabol, Devan Patel, Nick Zarbo, Briana Jackson, Brian Sharpe, Nicole Baitt, Kaitlyn Duffy, Gabrielle Jacobs, Ann Czuprun, Tracee Cash, Diamond Ivey, Kaitlyn Rubell                                                                                                                                                                                                                                                                                                                          | Rapid Medical Research                                           | Cleveland, OH   |
| Kristen Marks, MD           | Grant Ellsworth, Tina Wang, Timothy Wilkin, Mary Vogler, Carrie Johnston, Marshall Glesby, Roy Gulick, Ole Vielemeyer, Rebecca Fry, Todd Stroberg, Caitlin Rhoades, Noah Goss, Shaun Barcavage, Valery Hughes, Jonathan Berardi, Caroline Greene, Sarah Galloway, Caique Mello, Ashley Machado, Mia Crowley, Monique Williams, Katherine Fee, Elizabeth DeJesus, Andrew Yu, Minkyung Lee, Susan Herder, Mary Ann Zweibel, Patrice Weller, Antonio Rivera-Lopez, Edward Kenny, Hetal May, Natella Fridman, Parul Shah, Ruby Lee, Venus Fernandez, Victoria Lesina, Celine Arar, Byron Bullough, Kinge-Ann Marcelin, Brian Mangano, Jessenia Fuentes, Jiamin Li, Genessi Rodriguez, Catherine Jerry, Nadi Islam, Liqun Cai, Wayne Burns, Akinbayo Caulcrick, Andrika Thomas, Barbara Batog, Guoan He, Sara Yoder, Tamara Crowder, Gianna Resso, Sophia Alvarez, Tahera Begum, Elizabeth Connolly, Roxanne Rosario, Paul Kim, Steven Wang, Vasilika Koci | Cornell Clinical Trials Units - Weill Cornell Chelsea and Uptown | New York, NY    |

| Principal Investigator          | Study Team                                                                                                                                                                                                                                                                                                                                                                                                                                                                                                                                                                                                                                                                                                                                                                                                                                                                                                                                                                                                                                                                                                                                                                                                                                                                    | Institution                                      | Location        |
|---------------------------------|-------------------------------------------------------------------------------------------------------------------------------------------------------------------------------------------------------------------------------------------------------------------------------------------------------------------------------------------------------------------------------------------------------------------------------------------------------------------------------------------------------------------------------------------------------------------------------------------------------------------------------------------------------------------------------------------------------------------------------------------------------------------------------------------------------------------------------------------------------------------------------------------------------------------------------------------------------------------------------------------------------------------------------------------------------------------------------------------------------------------------------------------------------------------------------------------------------------------------------------------------------------------------------|--------------------------------------------------|-----------------|
| Judith Martin, MD               | Alejandro Hoberman, Timothy Shope, Gysella Muniz, Sonika Bhatnagar, Kumaravel Rajakumar, Anne-Marie Rick, Peri Unligil, Jennifer Nagg, Melissa Andrasko, Mary Ann Sieber, Jennifer Opal, Lalicia Roman, Spenser Kinsey, Michelle Burke, Matthew Lee, Dominic Kramer, Linette Milkovich, Emily Dougherty, Emily Camey, Shannon Mance, Nader Shaikh, Diana Kearney, Jamie Fries, Lisa Vavro, Shayla Goller                                                                                                                                                                                                                                                                                                                                                                                                                                                                                                                                                                                                                                                                                                                                                                                                                                                                      | UPMC University Center                           | Pittsburgh, PA  |
| John W. McGettigan, Jr., MD     | Walter Patton, Jennifer Schnider, Riemeka Brakema, Heeten Desai, Mikell Brett Karsten, Patricia Jalomo, Cindy Finch Benoy, Karin Choquette, Jonlyn McGettigan, Yvonne De Los Reyes, Melissa Cozzens, Amanda Hermosillo, Cindy Montgomery, Susan Tarwid, Annette Elzy, Tianna Young, Saysamone Banks, Cristina Fernandez, Damaris Atondo, Zoe Sesma, Norma Barrientos, Maggie Tono, Kisha Adams, JoAnn Wilkins, Arianna Bermudez, Carol Sayer, Julie McDowell, Angelina Navarro, Mercedes Sullivan, Crystal Mata, Sheldon Gingrich, Aaliyah Sestiaga, Gia Longo                                                                                                                                                                                                                                                                                                                                                                                                                                                                                                                                                                                                                                                                                                                | Quality of Life Medical & Research Centers       | Tucson, AZ      |
| Mark Montgomery McKenzie, MD    | Tiffany Jewell, Zackery Harmon, Michael Elizabeth, Christy Sweet, Teresa Deese, Catherine Schon, Misti Earwood, Lou Cappoli, Brennan Opanasenko, Lisa Guider, Michelle Forgey, Justian Jarrett, Rachel Scott, Elizabeth Michael, Erica Osmundsen, Andrew Wood, Shelly Brooks, Gisela Heintz, Lilian Nukuna                                                                                                                                                                                                                                                                                                                                                                                                                                                                                                                                                                                                                                                                                                                                                                                                                                                                                                                                                                    | WR-ClinSearch                                    | Chattanooga, TN |
| Vicki E. Miller, MD             | Sajjad Naqvi, Soofia Masood, Fredric Santiago, Sonia Guerrero, Subhash Koneru, Nirja Shah, Andrea Torres, Ramani Gali, Talha Baig, Heather Leary, Affah Ayub, Nayab Goher, Patti Tate, Reagen Reed, Muhammad Irfan, Amy Starr, Alefiyah Motiwala, Julia Kenny, Victoria Aguilar, Jessica Arguijo, Insiya Valika, Victoria Aguilar, Jagruti Patel, Anna Pena, Faryal Mahmood, Blanca Gomez, Nancy Torres, Kristyn Latil, Tarori Mark, Laura Djampou, Lindsey Kueng, Marianne Tadros, Mohammad Millwala, Monica Murray, Murtaza Marvi, Shivani Shah, Vanessa Gonzalez, Zohair Harianawala, Zainab Rizvi, Ambily Dileep, Jaquelyn Gonzales, Ragen Powell, Carolina Deandres, Syed Fahad Ali Kazmi, Sandra Natalia Perez, Shannon Amacker, Shiela Varghese                                                                                                                                                                                                                                                                                                                                                                                                                                                                                                                        | DM Clinical Research                             | Tomball, TX     |
| Gowdhami Mohan, MD              | Rodolfo Barrera, Emma Partin, Kelly White, Ashley Rochester, Charles Thompson, Stefanie Tyson, Ashten Sheriff, Alyssa-Kay Peay, Kayla Com, Barbara A. Richardson, Kristin Miller, Steven Clemons, Cameron King, Emma Partin, Gary Clemons, Brianna Starr, Danyel Johnson, Taylor Davis, Niki Tyson                                                                                                                                                                                                                                                                                                                                                                                                                                                                                                                                                                                                                                                                                                                                                                                                                                                                                                                                                                            | VitaLink Research                                | Anderson, SC    |
| Kathleen M. Mullane, DO, PharmD | David L. Pitrak, Cheryl Nuss, Karen Cornelius, Randee Estes, Amy Lockett, Michelle Moore, Judi Pi, Stephen Schrantz, Jill Stetkevych                                                                                                                                                                                                                                                                                                                                                                                                                                                                                                                                                                                                                                                                                                                                                                                                                                                                                                                                                                                                                                                                                                                                          | University of Chicago                            | Chicago, IL     |
| Joseph Lee Newberg, MD          | Mary Reyes, Nicole Leahy, Victoria Andriulis, Herbert Whinna, Patricia James, Lana Ghomrawi, Carole Kempfer, Miriam Arroyo, Maria Castro, Anna Maddox, Reuben Martinez, Jacquilyn McCormick-Burks, Laura Pearlman, Rosalinda Vazquez, Shaheera Suleiman, Neha Atal, Rosalind Vazquez                                                                                                                                                                                                                                                                                                                                                                                                                                                                                                                                                                                                                                                                                                                                                                                                                                                                                                                                                                                          | Synexus Clinical Research                        | Chicago, IL     |
| Richard M. Novak, MD            | Regina Harden, Maria Schwarber, Michael Pacini, Rebeca Gansari, Margie Villarreal, Stephanie Martin, Michelle Lee, Richard Morrissy, Taylor Ellis, Samuel Rene, Tara Cobbs, Claudia Preciado, Scott Borgetti, Maximo Brito, Olamide Jarrett, Mahesh Patel, Tracy Cable, Charity Ball, Maryann Holtcamp, Rodrigo Burgos, Sarah Michienzi, Emily Drwiega, Mikayla Johnson, Fischer Herald, Benjamin Ladner, Minseung Chu, Carolyn Dickens, Alfredo Mena Lora, Stockton Mayer, Andrea Wendrow, Habiba Sultana, Nanu Nunwar, David Chan, Marla Schwarber, Khandaker Anwar, Mahmood Ghassemi, Md Ruhul Amin, Doris Carroll, Rosa Valencia, Michelle Agnoli, Elena Llinas, Samuel Rene, Liam Morrissy, Adrian Raygoza, Addis Mekonnen, Lisa Lindemann, Daniel Meslar, Karen Pacini, Corey Ringhisen, Amy Kennedy-Krage, Claudia Miller, Loma Sanchez McCann, Gizelle Alvarez, Nia Moragne-Oneal, Nusirat Williams, Ian Feather, Nikki Griffith, Wardrick Nealon, Renyecz Powell, Nila Safaeian, Monica Gingell, Diana Bahena, Gerald Beck, Brad Farrington, Rod Reyes, Monica Wilson, Juline Wondrasek, Kimberly Shapiro, Shannon Whitted, Victoria Roehl, Braulio Carrasco, Michael Chen, Olivia Murray, Yasiel Lacalle, Tessa Eckley, Anna Schluckebier, Kevin Cao, Elise DeBruyn | University of Illinois at Chicago - Project WISH | Chicago, IL     |
| Paul Joseph Nugent, DO          | Leonard Singer, Jennifer Jones, April Smith, Georgettea Geuss, Lana Ghomrawi, Christine Bennett, Norma Blevins, Linda Brotherton, Michele Byrd, Krista Doss, Victoria Holden, Christine Hull, Jean Montgomery, Nancy Cipollone, Savannah Torline, Brandon Brown, Meagan Thomas, Katie Ziska, Dana Sias, Hannah Wagner                                                                                                                                                                                                                                                                                                                                                                                                                                                                                                                                                                                                                                                                                                                                                                                                                                                                                                                                                         | Synexus Clinical Research                        | Cincinnati, OH  |
| Jeffrey Scott Overcash, MD      | Hanh Chu, Kia Lee, Karla Zepeda, John Rodriguez, Adam Prince, Yashveer Dubbula, Elizabeth Tomatsu Michael Voskanian, Crystle Rajania, Stephanie Ramirez, Claudia Camacho, Lauren Arnett, Kecia Darbeau, Ashley Smith, Kimberly Quillin, Cesar Ramirez, Daniel Robitaille, Erica Sanchez, Allie Davis, Michael Waters, Pat Kappen, Valerie Horne, Thao Vuong, Andrew Dennis, Nikki Abels, Dominique Panis, Richard McQuaid, Whitley Harbison, Erika Trujillo, Andrea Garcia, Jose Jacob Esparza, Carlos Vera, Raquel Taitingfong, Cathy Meza, He Pu, Jackielynn Smith, Shandel Odom, Zahira Nieves, Ashleigh Lindsay, Ariana Nasatka, Jose Cazarez, Nora Martinez, Angela Hunt, Antonio Delgado, Linda Vega, Angela Anorve, Erica Martinelli, Melania Riordan, Sylvia Lindholm, Gina Ciezkowski, Grecia Perez, Jacob Pineda,                                                                                                                                                                                                                                                                                                                                                                                                                                                   | Velocity Clinical Research, San Diego            | La Mesa, CA     |

| Principal Investigator     | Study Team                                                                                                                                                                                                                                                                                                                                                                                                                                                                                                                                                                                                                                                                                                                                                                                                                                                                                                                                                                                                                                                                                                                                                                                                                                                                                                                                                                                                                                                             | Institution                                      | Location           |
|----------------------------|------------------------------------------------------------------------------------------------------------------------------------------------------------------------------------------------------------------------------------------------------------------------------------------------------------------------------------------------------------------------------------------------------------------------------------------------------------------------------------------------------------------------------------------------------------------------------------------------------------------------------------------------------------------------------------------------------------------------------------------------------------------------------------------------------------------------------------------------------------------------------------------------------------------------------------------------------------------------------------------------------------------------------------------------------------------------------------------------------------------------------------------------------------------------------------------------------------------------------------------------------------------------------------------------------------------------------------------------------------------------------------------------------------------------------------------------------------------------|--------------------------------------------------|--------------------|
|                            | Nathan Tyler, Ranya Salem, Amara Yilmaz, Jessica Gonzales, Zabrina Ruiz, Laura Castillo, Yajaira Contreras, Angelica Guzman, Makenna Orel, Jeffery Alvarez, Gordon Bovee, Roxana Ramirez, Joan Esquivel                                                                                                                                                                                                                                                                                                                                                                                                                                                                                                                                                                                                                                                                                                                                                                                                                                                                                                                                                                                                                                                                                                                                                                                                                                                                |                                                  |                    |
| James Todd Peterson, MD    | Christopher Mickelson, Madeline Maldonado, Alison Charlton, Ashley Bragg, Sean Hansen, Emily Wilcox, Colby Bostock, Megan Henry, Pam Iwasaki, Bradley Young, Katelyn Walker, Joy Nguyen, Lindsey Bevan, Megan Grimmett, Madeline Grote, Heather Littell, Natalie Bee, Alexander Clark, Shana Eborn, Susan Edwards, Dan Henry, Heather Jackson, Gerald Kelly, Issac Pena-Renteria, Jacqueline Rohrer, Jack Taylor, Brooke Barrick, Ty Henry, Anna Dansie, Kenadie Hamblin                                                                                                                                                                                                                                                                                                                                                                                                                                                                                                                                                                                                                                                                                                                                                                                                                                                                                                                                                                                               | J. Lewis Research                                | Salt Lake City, UT |
| Paul Pickrell, MD          | Susan Bonner, Blaire Graham, Staci Taggart, Hussain Malbari, Tiffany Lemuz, Ethan Shotton, Andrew Bell, Megan Malek, David Pampe, Carol Ann Linebarger, Michelle Peterson, Brandi Chalman, John Luna, Elizabeth Santellanes, Christina Martinez, Lisa Johnson, Lisa Savage, Melissa Winn, Wendi McKenzie, Eileen Euperio, Stefanie Mott, Paul Menefee, Katie Caballero, Darrell O'Brien, Morgan Schulle, Kate Jurek, Olivia Hapanowicz                                                                                                                                                                                                                                                                                                                                                                                                                                                                                                                                                                                                                                                                                                                                                                                                                                                                                                                                                                                                                                 | Tekton Research, Inc.                            | Austin, TX         |
| Terry L. Poling, MD        | Meenakshi (Kavya) Natesan, Patricia Contreras, Denise Hole, Avi Woods, Jill Hiebert, Melissa Burton, Olivia Eagleson, Laura Holz, Terri Ford, Cindy Thome, Terry D Klein, Gregory Greer, Diandra Henriques, Tracy R Klein, Thomas C Klein, Christa Shue, Gina Young, Brenna Sprout                                                                                                                                                                                                                                                                                                                                                                                                                                                                                                                                                                                                                                                                                                                                                                                                                                                                                                                                                                                                                                                                                                                                                                                     | Alliance for Multispecialty Research             | Wichita, KS        |
| Bruce G. Rankin, DO        | Jennifer Dittman, Lora Parahovnik, Crystal Paccione, Melissa Hodges, Katina Marchione, Matt Maxwell, Any Dominy, Diana Toney, Andrea Marrafino, Laura Isbell, Leandro Fernandez, Claxton Copeland, Michelle Tutt, Adam VanDeusen, Kevin Feldman, Clark Mason, Tifany Huertas, Over Seijas, Jennifer Cline, Christian Beierschmitt, Ryan Hobbick, Jessica Gilliam, Jeanette de Leon, Iman Mencia, Daniel Layish, Vienna Bauer, Shatonia Fields, Albert Garcia, Carrie Rycort, Tasha Brocato, Marshall Nash, Samantha Watts, Amy Houck-Dominy, Angela Hammerle, Teresa Logsdon, Erika Wierzbicki, Taylor Martin, Ranie Hutchins, Fadhel Alyunis, Gail Lavine, Jeffery Hood, Robert Duran, Michelle Jones, Ginny McClanahan, Heather Jackson, Leandra Fernandez, Douglas Winter, Antonio Rivera, Amber Vasquez, Thais Truffa, Daniel Campbell, Grace Newcomb, Elizabeth Orlando, Steven Shinn, John Hill, Christina Isbell, Dhaneshwar Oomrow, Alicia Cevera                                                                                                                                                                                                                                                                                                                                                                                                                                                                                                              | Accel Research Sites                             | DeLand, FL         |
| Michele Diane Reynolds, MD | Jennifer Bashour, Robert Schmidt, Cynthia Mayeux, Uvoka Huffman, Lisa Nicholson, Jacklyn Newton, Lynn Yauch, Cathy Monroe, Kathleen Carty, Angelica Banks, Taylor Werner, Pamela Echols, Pauline Jackson, Chana Hines, Lorine Cook, Cristina Puig, Patrick Brooks, Jennifer Ruiz, Deanna Bowman, Ladia Garcia                                                                                                                                                                                                                                                                                                                                                                                                                                                                                                                                                                                                                                                                                                                                                                                                                                                                                                                                                                                                                                                                                                                                                          | Synexus Clinical Research                        | Dallas, TX         |
| Rambod Rouhbakhsh, MD, MBA | John Johnston, Richard Calderone, Tasha Stevenson, Tameka Fortune, Brandi Pace, Adreanna Pou, Jerrica Sullivan, Yolanda Lewis, April Rouse, Tiffany Jefferson, Elizabeth Danford, Jeff Repper, Mason Boutwell, Alexycia Washington, Krista Hirth, Meagan Grabel                                                                                                                                                                                                                                                                                                                                                                                                                                                                                                                                                                                                                                                                                                                                                                                                                                                                                                                                                                                                                                                                                                                                                                                                        | MediSync Clinical Research<br>Hattiesburg Clinic | Petal, MS          |
| Nadine Roupheal, MD        | Renata Dennis, Tigisty Girmay, Michelle Wiles, Sharon Curate-Ingram, Lauren Hewitt, Alexis Anonen, Mari Hart, Sarah Bechnak, Erin Carter, Lauren Nolan, Daniel Sans Graciaa, Geoffrey Kamau, Easton Beshears, Sy Tran, Mary Atha, Mary Bower, Ghina Alaaedine, Brandy Johnson, Jacob Usher, Eileen Osinski, Erin Scherer, C. Tae Stallworth, Stephanie Ramer, Rose Pope, Esther Park, Francine Dyer, Laura Clegg, Rebecca Gonzalez, Stacey Wheeler, Susan Rogers, Vy Ngo, Vanessa Soliman, Kristen Unterberger, Bernadine Panganiban, Christopher Huerta, Juton Winston, Ali Alvarez, Jianguo Xu, Colleen Kelley, Paulina Rebolledo, Nicholas Scanlon, Jessica Traenkner, Matthew Collins, Hollie Macenczak, Cassie Grimsely-Ackerley, Tiffany Lee, Amy Anderson, Michele Paine McCullough, Hannah Huston, Daniella Carter, Lisa Harewood, Srilatha Edupuganti, Varun Phadke, Mindee Adamson, Jeanne Allen, Debbie Bartenfeld, Lily Berz, Amy Cromwell, Sergio Cruz, Fred Ede, Monica Godfrey, Evan Gutter, Angelle Ijeoma, Sara Jo Johnson, Vinit Karmali, Dean Kleinhenz, Jennifer Kleinhenz, Alexandra Koumanelis, Maranda Leary, Tiraje Lester, Juliet Alise Morales, Shashi Nagar, Julia Paine, Dilshad Rafi Ahmed, Brittany Robinson, Amanda Rosner, Renee Silver, Trevor William Simon, Talib Sirajud-Deen, Damien Swearing, Maliya Tolbert, Pamela Turner, Chia Uziegbunam, Claire Wan, Dongli Wang, Erika Wimberly, Jean Winter, Joy Winters, Yong Xu, Sha Yi | Emory University - Hope Clinic                   | Decatur, GA        |
| Richard Rupp, MD           | Amber Stanford, Megan Berman, Laura Porterfield, Gerianne Casey, Hala Ghoson, Doreen Jones, Michael Willig, Cori Burkett, Robert Cox, Amy McMahan, Diane Barrett, Kristin Pollock                                                                                                                                                                                                                                                                                                                                                                                                                                                                                                                                                                                                                                                                                                                                                                                                                                                                                                                                                                                                                                                                                                                                                                                                                                                                                      | University of Texas Medical Branch               | Galveston, TX      |
| Jamshid Saleh, MD          | Matthew Miles, Rafael Lupercio, Vicky Martin, Marla Clark, Matthew Pohlmeier, Ruba Zanaid, Veronica Blevins, Tara Ulberg, Carlyee Chambers, Marisol Corrales, Emily Crews, Mohamed Yassin, Sarah Sandberg, Frank Chen, Mandy Swanson                                                                                                                                                                                                                                                                                                                                                                                                                                                                                                                                                                                                                                                                                                                                                                                                                                                                                                                                                                                                                                                                                                                                                                                                                                   | Paradigm Clinical Research Center                | Redding, CA        |
| John W. Sanders, MD, MPH   | Stacy Harpe-Hall, Jesse Hopkins, Ann Schweppe, Jaymous Fayssoux, Kathryn Bender, James Peacock, Katharine Pearsall, Brandy Snyder, Deidre Knox, Megan Thorpe, Melissa Ellingson, Brittany Bundeuff, Lisa Ashworth, Meredith Hiatt, Ritu Rathee, Stacy Woodliff, Brian Strittmatter, Amanda Wright, Daisy DeWeese-Gatt,                                                                                                                                                                                                                                                                                                                                                                                                                                                                                                                                                                                                                                                                                                                                                                                                                                                                                                                                                                                                                                                                                                                                                 | Wake Forest University Health Sciences           | Winston Salem, NC  |

| Principal Investigator    | Study Team                                                                                                                                                                                                                                                                                                                                                                                                                                                                                                                                                                                                                                                                                                                                                                                                                                                                                                                                                                                                       | Institution                          | Location           |
|---------------------------|------------------------------------------------------------------------------------------------------------------------------------------------------------------------------------------------------------------------------------------------------------------------------------------------------------------------------------------------------------------------------------------------------------------------------------------------------------------------------------------------------------------------------------------------------------------------------------------------------------------------------------------------------------------------------------------------------------------------------------------------------------------------------------------------------------------------------------------------------------------------------------------------------------------------------------------------------------------------------------------------------------------|--------------------------------------|--------------------|
|                           | Caryn Morse, John Williamson, Samantha Wheeler, Lori Whiteheart, Susan Donahue, James Lovette, Kaitlyn Van Leuvan, Kelly Ledbetter, Scott Chatterton, Julio Nasim, Amie Sidberry, Ashley Davis, Carter Noecker, Chie Hooker, Johanna Breenan, Sam Cable, Anna Bowman, Stephanie Boothe, Shea Overcash                                                                                                                                                                                                                                                                                                                                                                                                                                                                                                                                                                                                                                                                                                            |                                      |                    |
| Howard I. Schwartz, MD    | Carlos Valladares, Jocelyn Morrera, Yulexis Amestoy, Tori Wallenburg, Thelma Beltran, Terry Piedra, Monica Garces, Alexandra Galvis, Wanda Delgado, Catherine Casas, Lesly Miguel Sosa, Vivian Rosales, Jose Fernando Henriquez, Mikael Yaniz, Beatriz Rivera, Peter Ventre, Gabriella Huyke, Maria Companioni, Jessie De Vega, Brianna Gamez, Stephanie Diaz, James Jean-Mary, Americo Padilla, Nikita Notise, Yorlina Luquetta, Monifa Wilson-Morris, Kenia Gutierrez, Roilan Garcia, Karla Pentzke, Leyda Valentin, Lazara Novas, Marlein Camacho, Jazmin Henfield, Laymis Alvarez, Myriam Rosado, Maxine Bryant, Maria Pinero, Laura Raucchi, Francisco Ramirez, Angelic Gamez, Mailin Perez, Yasmin Baddour, Hary Leon Joseph, Yaquelin De la Cruz, Dunia Torres, Rosaidaliz Carreira, Chanella Garcia, Surisaday Mederos, Jose Muniz, Karendra Plotka, Sara Gomez, Maria Soto, Cathy Cruz, Nelia Sanchez-Crespo, Jennifer Schwartz, Barbara Corral, Matthew Muniz, Dayana Deltejo, Ana Castro, Reem Hassan | Research Centers of America          | Hollywood, FL      |
| Nathan Segall, MD         | Michelle Sowell, Nancy Levine, Erynn McKinley, Hannah Smith, Karen Hickson, Elizabeth West, Patricia Greene, Jon Finley, Mildred Stull, Susan Jones, Jennifer LeBrun, Pamela Talbott, Kwanda Whatley, Jeffrey Jones, Michelle Binns, Donna Toepfer, Cynthia Steele, Grace Newville, Gillian Waite, Cynthia Pinckney, Karen Yangapatty, Kiara Tyner, Kimberly Cobb, Kourtney Richardson                                                                                                                                                                                                                                                                                                                                                                                                                                                                                                                                                                                                                           | Clinical Research Atlanta            | Stockbridge, GA    |
| William Seger, MD         | Kimberly Pullen, Jean Seignon, Anthony Kim, Mohammed Antwi, Allison Green, Lizzy Seger, Elizabeth Boydston, Abdur Rafay Qadri, Deborah Devlin, Tasha Todd, Oluwatosin Akingbala, Alma Guel, Tisha Davis, Melody Dufrene, Samantha Loudermilk, Virginia Loudermilk, Crystal Starr, John Villegas, Ben Seger, Katherine Hollie                                                                                                                                                                                                                                                                                                                                                                                                                                                                                                                                                                                                                                                                                     | Benchmark Research                   | Fort Worth, TX     |
| Neil Parmanand Sheth, MD  | Kenneth Stell, David Beckett, Enitt Gonzalez, Donna McGunigal, Amanda Bums, Nancy Wood, Shelley Miceli, Christina Avila, Rebecca Baker, Laura Vigliotti, Sarah Kading, Samer Salama                                                                                                                                                                                                                                                                                                                                                                                                                                                                                                                                                                                                                                                                                                                                                                                                                              | Synexus Clinical Research            | Glendale, AZ       |
| William B. Smith, MD      | Richard L Gibson, Jennifer Winbigler, Elizabeth Parker, Madison Watts, Suzann Cloninger, Talya Thomas                                                                                                                                                                                                                                                                                                                                                                                                                                                                                                                                                                                                                                                                                                                                                                                                                                                                                                            | Alliance for Multispecialty Research | Knoxville, TN      |
| Joel Solis, MD            | Martha Carmen Medina, Xavier Morales, Hank Heller, Blake Torrence, Joanna Gurrola-Mahoney, Cynthia Bueno, Heather Holloway, Irving Salinas, Joel Perez, Paola Garcia, Erica Canales, Blanca Urbina, Brancisilio Gutierrez, Carolina Cantu, Chelsea Vargas, Cindy Vasquez, Cody McIntire, Gabriela Gutierrez, Hugo Sosa, Irvin Munoz, Jessica Estrada, Jonna Lopez, Kaegan Knox, Mirella Melendez, Natalia Valle, Natalie Echavarría, Nicole Litton, Amber Victor, Nancy Torrence, Madhu Shreya, Mathew Maran, Asfak Alam, Westly Keating, Tara Green, Devora Torrence, Gerardo Sedas, Shruti Konda, Prem Jangam, Mario Echavarría, Alejandro Silva, Anne McNulty, Daniel Contreras, Daniel Gomez, Edgar Garcia, Elizabeth Weber, Luis Lopez, Samuel Ramirez, Kayla Lopez, Pedro Penalo, Angel Salinas, Jaime Solis, Shannon Moyer, Aryana Ibarra, Guadalupe Gurrola, Jenna Anastasiades, Uchechi Ehiemua, Sara Solorzano                                                                                         | Centex Studies, Inc.                 | McAllen, TX        |
| Stephen A. Spector, MD    | Amaran Moodley, Jill Blumenthal, Baharin Abdullah, Christina Addington, Juan Carlos Alcantar, Deyna Arellano, Bernadette Cale, Brendan Costello, Tammelita Cotton-Pineda, Fanny Delebecque, Karen Deutsch, Aram Dimayuga, Son Do, Yasmeen Eshshaki, Aileen Everhart, Cindy Ewing, Veronica Figueroa, Medardo Gaytan, Crystal Groom, Carolyn Hernandez, Heather Huitema, Benjamin Hull, Sylvia Isaac, Jaclyn Jaskowiak, Cindy Knott, Leander Lazaro, Thuan Le, Megan Loughran, Michelle Madey, Rosalva Martha-Patten, Colleen McLellan, Jeff Ledford-Mills, Asami Mimura, Patty Moraes, Jennifer Morales, Jessica Nasca, Phirum Nguyen, Marielys Padilla-Martinez, Dennis Perpetua, Mike Pizza, Shannon Ransom, Emily Rizo, Carlos Rojas, Thaine Ross, Marie Sagrado, Eugene Sato, Lisa Stangl, Ji Sun, Nancy Tang, Mina Trivedi, Rodney Trout, Donna Voss, Lindsey Woronicz                                                                                                                                      | University of California, San Diego  | La Jolla, CA       |
| Cynthia Becher Strout, MD | Rica Santiago, Yvonne Davis, Patty Howenstine, Alison Bondell, Jaime Robertson, Anissa Moussa, Geronimo Feria Garzon, Sierra Bennett, Marlena Petrie                                                                                                                                                                                                                                                                                                                                                                                                                                                                                                                                                                                                                                                                                                                                                                                                                                                             | Coastal Carolina Research Center     | Mount Pleasant, SC |
| Shobha Swaminathan, MD    | Amesika Nyaku, Tilly Varughese, Rondalya Deshields, Michelle L DallaPiazza, Elise Lewis, Jennifer Punsal, Mario Portilla, Malithi Desilva, Christina Daliani, Susana Rivera, Aidan Ziobro, Andressa Rebellatto, Brian Murloy, Christina Ninan, Ernest Pianim, Eunice Wang, Merit Henen, Muhammad Usman, Rebecca Kim, Shiao Wang, Gener Eric Cruz, Bethany Birago, Joyell Arscott, Dina Meawad, Christie Lyn Costanza, Francesca Escaleira, Zoraida Cruz-Barahona, Jared Khan, Valeria Cadoret, Jamir Tuten, Travis Love, Eric Asencio, Sukhwinder Singh                                                                                                                                                                                                                                                                                                                                                                                                                                                          | Rutgers New Jersey Medical School    | Newark, NJ         |

| Principal Investigator       | Study Team                                                                                                                                                                                                                                                                                                                                                                                                                                                                                                                                                                                                                                                                                                                                                                                                                                                                                                                                                                                                                                                                                                                                                                                                                                                                                                                                                       | Institution                                 | Location        |
|------------------------------|------------------------------------------------------------------------------------------------------------------------------------------------------------------------------------------------------------------------------------------------------------------------------------------------------------------------------------------------------------------------------------------------------------------------------------------------------------------------------------------------------------------------------------------------------------------------------------------------------------------------------------------------------------------------------------------------------------------------------------------------------------------------------------------------------------------------------------------------------------------------------------------------------------------------------------------------------------------------------------------------------------------------------------------------------------------------------------------------------------------------------------------------------------------------------------------------------------------------------------------------------------------------------------------------------------------------------------------------------------------|---------------------------------------------|-----------------|
| Ramy Joseph Toma, MD         | Olivia Graves, Josiah Robinson, Patricia Hammonds, Lana Ghomrawi, Kara Quinnelly, Shaun O'Conor, Michael Lambe, Rachell Stewart, William Kirby, Pink Folmar, Rachel Culbreth, Heidi Leblanc, Julie McDaniel, Rian Montgomery, Andrea Woodle, Samantha Williams, Hunter Russell, Shereen Lowe, Maureen Mayer, Hollis Ryan, Elaine Reese                                                                                                                                                                                                                                                                                                                                                                                                                                                                                                                                                                                                                                                                                                                                                                                                                                                                                                                                                                                                                           | Synexus Clinical Research                   | Birmingham, AL  |
| Timothy P. Vachris, MD       | Mark Hutchens, Stephen Daniels, Margaret Wells, Sandra Clancy, Rebecca Martinez, Jessica Buot, Merissa Daugherty, Julie Hamilton, Kimberly Hernandez, Ashli Alejandro, Amy Collins, Monique Gawlik, Patricia Johnson, Maria Moreno, Ashley Washington, Tina Rountree, Daniel Dore, Ravi Davuluri, Ashlee Brunaugh, Jorge Martinez, James Hermon, Vianai Carreno, Mia Rountree, Colleen Coelho                                                                                                                                                                                                                                                                                                                                                                                                                                                                                                                                                                                                                                                                                                                                                                                                                                                                                                                                                                    | Optimal Research                            | Austin, TX      |
| Keith William Vrbicky, MD    | Charles Harper, Chelsie Nutsch, Wendell Lewis III, Cathy Laflan, Linden DeBoer, Kayla Andal, Misty Appeldorn, Jenniger Grebe, Russell Herstein, Catherine King, Samantha Wieseler, Alisha Kiepke, Christy Lee, Kelsey Kelley, Kelli James, Ashley Frisch, Courtney Green, Taysa Hingst, Jeni Hoppe, Kimber Breeden, Debra Gabrielson, Ginny McNew                                                                                                                                                                                                                                                                                                                                                                                                                                                                                                                                                                                                                                                                                                                                                                                                                                                                                                                                                                                                                | Meridian Clinical Research                  | Norfolk, NE     |
| Larkin T. Wadsworth III, MD  | Ashley Dale, Christy Schultz, Rebecca Munsch, Anya Penly, Liz Garner, Stephanie Tesson, George Chermiawski, Angie Kean, Dan Reed, Courtney Kubiak, Maureen Dempsey, Heather Chermiawski, Breanna Galibert, Kristin Branson, Laura Hartuppee, Karen Knapp, Horacio Marafioti, Lyly Dang, Jennifer Berry, Lauren Clement, Megan Dandurand                                                                                                                                                                                                                                                                                                                                                                                                                                                                                                                                                                                                                                                                                                                                                                                                                                                                                                                                                                                                                          | Sundance Clinical Research                  | St. Louis, MO   |
| Jordan L. Whatley, MD        | Patricia Whatley, Christopher Dedon, Anika Payne, Amie Shannon, Kristen Losavio, Nicole Harrell, Mary Margaret Dobson, Lindsey Hall, Chaney Bennett, Crystal Rowell, Mimi Dimmick, Amy Thomassie, Kimber Breeden, Cody LaFleur, Makaylea Truitt, Taryn Collett, Emily Best, Alexandra Caillouet,                                                                                                                                                                                                                                                                                                                                                                                                                                                                                                                                                                                                                                                                                                                                                                                                                                                                                                                                                                                                                                                                 | Meridian Clinical Research                  | Baton Rouge, LA |
| Judith White, MD             | Amy Edridge, Chelsea Montalvo, Eugenia Clark, Lisa Russell, Zahra Somji, Lesli Leimer, Robert Meyer, Christine Murphy, Prity Patel, Sejal Patel, Ruben Moliere, Samantha Merveillard, Yarnick Mirjah, Bryn Walls, Joey Cruz, Aaron Cooper, Jessica Bienaime, Ashley Gilcrist, Alisa Petit, Tyler Knightly, Kimberly Stokes, Christina Rosario, Talhia Matos, Ilona Boggs, Nicholas Weber, Felix Busot, Linda Colon, Heather Gillenwater, Cristina Kaplun, Melissa Caputi, Shayna Siplin, Daminee Shah, Samuel Martin, Alexis Waldorf, Vihar Upadhyay, Adolfo Henriquez, Saskia Singh, Maria Roberts, John Caporelli, Shirley Salvador, Quevina Scarver, Vanessa Garcia, Taylor Moore, Jayasen Singh, Curshinda Galvin-Burch, Mary Kesner, Jasmin Gil, Shay Gray, Steven Monsegur, Michele Steinmetz, Michael Lambe, Heather Powell, Sandra Torres, Shaban Katbeh, Taylor Wilson                                                                                                                                                                                                                                                                                                                                                                                                                                                                                  | Synexus Clinical Research                   | Orlando, FL     |
| Priyantha N. Wijewardane, MD | Natalie Johnson, Martha Evans, Sondra Wright, Richard Pellegrino, Lastida Burns, Natasha Williams, Haylee Rowe, Kayla Graham, Amanda Horn, Eric Bravo, Jeffrey Thessing, A. Michele Maxwell, Amy Cooper, Lauren Evans, Tonya Cato, Haylee Tucker, Lesa Gann, Hannah Jones, Amanda May, Tiffany Walker, A. LeiAn Diaz, Laura Khalil, Lydia Purcell, Timothy Campbell, Charlotte Garcia-Velez, Andrea Scarborough, Beatrice A. Miller, Keith Bracy, Aujania Thompson, Cassandra Johnson, Krishana Day, Freddie Hicks, Jamie Pettus                                                                                                                                                                                                                                                                                                                                                                                                                                                                                                                                                                                                                                                                                                                                                                                                                                 | Baptist Health Center for Clinical Research | Little Rock, AR |
| Barton G. Williams, MD       | Flo Abbott, Nicole Burton, Alice Cipollini, Madison Croucher, Philip Dattilo, Erin Harrelson, Kelsey Heston, James Ingram, William H Jones, Karla Lane, Brandy Lowman, Evan Lucas, Megan Marles, Morgan Mathis, Angie Northcott, Clyda Pasquantonio, Alyssa Valente, Ciara Winders, Stephanie Graham                                                                                                                                                                                                                                                                                                                                                                                                                                                                                                                                                                                                                                                                                                                                                                                                                                                                                                                                                                                                                                                             | Trial Management Associates                 | Wilmington, NC  |
| Marcus J. Zervos, MD         | Paul Kilgore, Mayur Ramesh, Jelena Verkler, Pardeep Pabla, Andrew Clark, Katrina Williams, Dee Dee Wang, Beverley Duthie, Samia Arshad, Alandra White, Anna Kern, Ashley Mattern, Bilqis Mosed, Dana Parke, Doreen Dankerlui, Dragana Spasevska, Hanah Woods, Helina Misikir, Howard Klausner, Janay Scott, Jessica Heinonen, John Zervos, Joseph Miller, Kate Zenlea, Kristin Eis, Marissa Vasquez, Maurice Slaughter, Meaghan Flynn, Michael Garcia, Michelle Sankah, Nina Paeilli, Philip Benson, Robert Devore, Stevanya Baho, Tony Eljallad, Tyler Prentiss, Yaman Ahmed, Sharon Mathys, Linda Kaljee, Jeffrey Van Laere, Claudia Hanni, Hassan Zafar, Mona Desai, Gina Maki, Mary Perri, Dora Vager, Shannon Thomas, Autumn Robinson, Isis Hamilton, Sonia Eliya, Jehan Jazrawi, Biljana Popovic, Sharon Zahul, Joshua Ruzzin, John Laguo, Ali Mathena, Bobby Cook Jr., Marlene Hesler, Rochelle Fleming, Terria Minniefield, John Simons, Sherese Henderson, Ashley Hopkins, Rebecca McFarlane, Raeshell Carson, Jonathan Williams, Katherine Reyes, Erica Herc, Indira Brar, Mayur Ramesh, John McKinnon, Lacquis Duncan, Tim Asmar, Margaret Beyer, Kaleem Chaudhry, Madison Lee, Jo-Ann Rammal, Karthik Sridasyam, Siddesh Veer, Angelique Buluran, Kimberlyn Lott, Jeremiah Rooker, Alayna Wilder, Kathleen Wilson, Allison Weinmann, Hassan Mourtada | Henry Ford Health System                    | Detroit, MI     |

## United States Government (USG)/Coronavirus Prevention Network (CoVPN) Biostatistics Team

(PubMed listed, and ordered alphabetically by institution affiliation)

| Affiliation                                                                                                        | Team Members                                                                                                                                                                                                                                                       |
|--------------------------------------------------------------------------------------------------------------------|--------------------------------------------------------------------------------------------------------------------------------------------------------------------------------------------------------------------------------------------------------------------|
| Biomedical Advanced Research and Development Authority (BARDA), Washington, DC                                     | Di Lu, James Zhou                                                                                                                                                                                                                                                  |
| Department of Biostatistics and Bioinformatics, Rollins School of Public Health, Emory University                  | David Benkeser                                                                                                                                                                                                                                                     |
| Vaccine and Infectious Disease Division, Fred Hutchinson Cancer Research Center, Seattle, WA                       | Jessica Andriesen, Bhavesh Borate, Lindsay N. Carpp, Andrew Fiore-Gartland, Youyi Fong*, Peter B. Gilbert*, Ying Huang*, Yunda Huang, Ollivier Hyrien, Holly E. Janes*, Michal Juraska, Yiwen Lu, April K. Randhawa, Lars W.P. van der Laan, Chenchen Yu, Bo Zhang |
| Biostatistics Research Branch, NIAID, NIH, Bethesda, MD                                                            | Michael P. Fay, Jonathan Fintzi, Dean Follmann, Martha Nason                                                                                                                                                                                                       |
| Clinical Monitoring Research Program Directorate, Frederick National Laboratory for Cancer Research, Frederick, MD | Eric Chu                                                                                                                                                                                                                                                           |
| Department of Biostatistics, T.H. Chan School of Public Health, Harvard University                                 | Nima S. Hejazi                                                                                                                                                                                                                                                     |
| Department of Biostatistics, University of Washington, Seattle, WA                                                 | Marco Carone, James Peng, Charlotte Talham                                                                                                                                                                                                                         |
| Department of Statistics, University of Washington, Seattle, WA                                                    | Alex Luedtke                                                                                                                                                                                                                                                       |
| Department of Population Health Sciences, Weill Cornell Medical College, New York, New York                        | Iván Díaz                                                                                                                                                                                                                                                          |
| Kaiser Permanente Washington Health Research Institute                                                             | Brian D. Williamson                                                                                                                                                                                                                                                |
| Department of Biostatistics and Bioinformatics, Duke University; Global Health Institute, Duke University          | Avi Kenny                                                                                                                                                                                                                                                          |

\*YF, PBG, YH, and HEJ are also affiliated with the Department of Biostatistics, University of Washington, Seattle, WA. PBG is also affiliated with the Public Health Sciences Division, Fred Hutchinson Cancer Research Center, Seattle, WA.



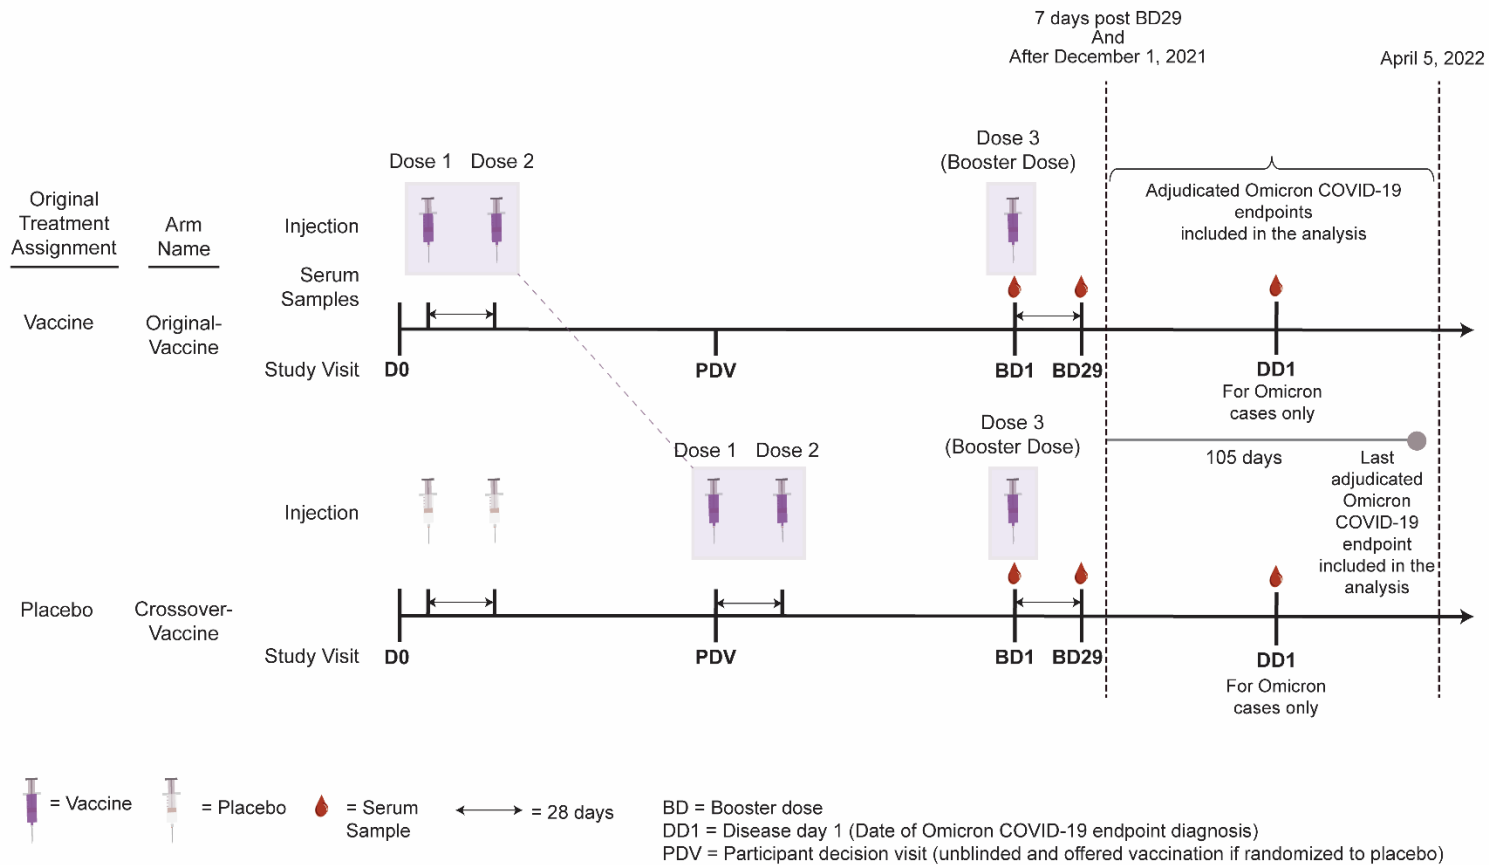

**Supplementary Fig. 1. Timing of doses, study visits for serum sampling, and follow-up for Omicron COVID-19 endpoints included in the analysis.** The median time interval between the second dose and the third (booster) dose was 12.9 months in the original-vaccine arm and 8.2 months in the crossover-vaccine arm.

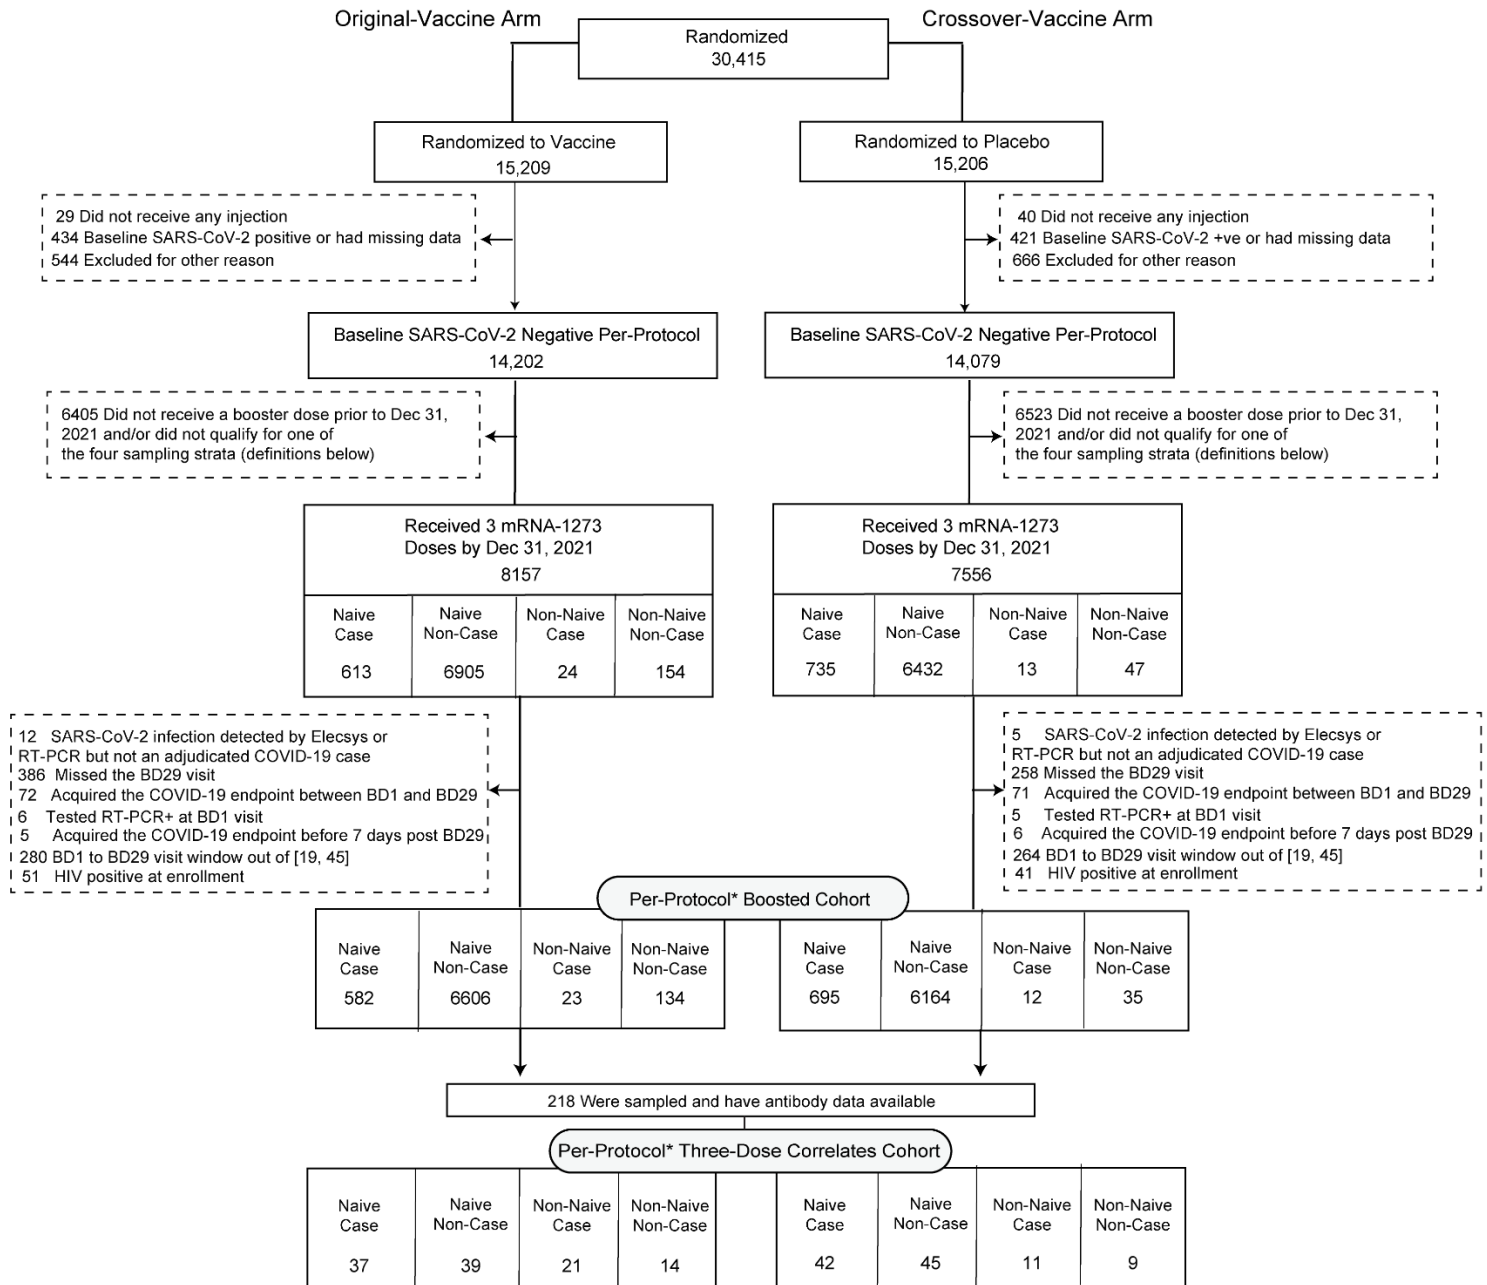

**Sampling Strata Qualification:**

- Naive/Case: No evidence of SARS-CoV-2 infection detected by Elecsys (Roche) or RT-PCR from enrollment through BD1; Omicron COVID-19 event in the interval [max(BD29 + 7, December 1, 2021), data cut-off date April 5, 2022].
- Naive/ Non-Case: No evidence of SARS-CoV-2 infection detected by Elecsys or RT-PCR from enrollment through BD1; No evidence of SARS-CoV-2 infection detected by Elecsys or RT-PCR in the interval (BD1, data cut-off date April 5, 2022).
- Non-Naive/Case: Any evidence of SARS-CoV-2 infection in the interval [Dose 2 of mRNA-1273 + 14, BD1]; SARS-CoV-2 infection detected by Elecsys or RT-PCR in the interval [max(BD29 + 7, December 1, 2021), data cut-off date April 5, 2022] and the Elecsys test was not positive at BD-D1 pre-booster.
- Non-Naive/Non-Case: Any evidence of SARS-CoV-2 infection in the interval [Dose 2 mRNA-1273 + 14, BD1]; No evidence of SARS-CoV-2 infection detected by Elecsys or RT-PCR in the interval (BD1, data cut-off date April 5, 2022).

\*Here, "per-protocol" refers to additional criteria beyond the original per-protocol criteria during the blinded phase as in Gilbert et al. 2022.

**Supplementary Fig. 2. Flowchart of study participants from enrollment in COVE through to the per-protocol three dose correlates cohort.**

**Supplementary Table 1. n = 218 sampled participants in the per-protocol three-dose correlates cohort (Fig. S2) by sampling stratum (N = SARS-CoV-2 naive and NN = Non-Naive) and time period of receipt of third (booster) dose.**

|                                         | Time Period of Receipt of Third (Booster) Dose (BD1 Visit) |     |                        |     |                |     |                |     | Total    |
|-----------------------------------------|------------------------------------------------------------|-----|------------------------|-----|----------------|-----|----------------|-----|----------|
|                                         | Sep 23 to Oct 15, 2021                                     |     | Oct 16 to Oct 31, 2021 |     | November, 2021 |     | December, 2021 |     |          |
| Original-Vaccine Arm<br>× Omicron Case  | 8N                                                         | 8NN | 11N                    | 5NN | 7N             | 7NN | 11N            | 1NN | 37N 21NN |
| Original-Vaccine Arm<br>× Non-Case      | 8N                                                         | 7NN | 10N                    | 2NN | 8N             | 4NN | 13N            | 1NN | 39N 14NN |
| Crossover-Vaccine Arm<br>× Omicron Case | 9N                                                         | 5NN | 12N                    | 1NN | 10N            | 5NN | 11N            | 0NN | 42N 11NN |
| Crossover-Vaccine Arm<br>× Non-Case     | 9N                                                         | 4NN | 12N                    | 0NN | 10N            | 4NN | 14N            | 1NN | 45N 9NN  |

Omicron Case= COVID-19 endpoint in the interval [ $\geq 7$  days post BD29 AND  $\geq$  December 1, 2021 to April 5, 2022 data cutoff date]. As described in the SAP (Appendix A) the COVID-19 endpoint is documented to be Omicron BA.1 if possible whereas for some non-naive COVID-19 endpoints there was not lineage data available to document the case to be Omicron BA.1. COVID-19 endpoints were hard-imputed as Omicron BA.1 if the COVID-19 diagnosis date was before January 15, 2022.

Non-case = Did not acquire COVID-19 (of any strain) in the interval [BD1, data cutoff date].

SARS-CoV-2 naive (N) = No evidence of SARS-CoV-2 infection from enrollment through to BD1; Non-naive (NN) = Any evidence of SARS-CoV-2 infection in the interval [ $\geq 14$  days after the first two doses of mRNA-1273, BD1]

**Supplementary Table 2. Demographic and clinical information of the per-protocol boosted cohort and the per-protocol three-dose correlates cohort (original-vaccine and crossover-vaccine arms combined)**

| Characteristics                           | Per-Protocol Boosted Cohort<br>(Original Vaccine and Crossover Vaccine Combined) |                   |                   | Per-Protocol Three-Dose Correlates Cohort<br>(Original Vaccine and Crossover Vaccine Combined) |                   |                   |
|-------------------------------------------|----------------------------------------------------------------------------------|-------------------|-------------------|------------------------------------------------------------------------------------------------|-------------------|-------------------|
|                                           | SARS-CoV-2 Naive<br>(N=14047)                                                    | Non-Naive (N=204) | Total (N=14251)   | SARS-CoV-2 Naive<br>(N=163)                                                                    | Non-Naive (N=55)  | Total (N=218)     |
| <b>Age</b>                                |                                                                                  |                   |                   |                                                                                                |                   |                   |
| Age < 65                                  | 9683 (68.9%)                                                                     | 155 (76.0%)       | 9838 (69.0%)      | 121 (74.2%)                                                                                    | 44 (80.0%)        | 165 (75.7%)       |
| Age ≥ 65                                  | 4364 (31.1%)                                                                     | 49 (24.0%)        | 4413 (31.0%)      | 42 (25.8%)                                                                                     | 11 (20.0%)        | 53 (24.3%)        |
| Mean (Range)                              | 54.1 (18.0, 95.0)                                                                | 51.6 (19.0, 84.0) | 54.0 (18.0, 95.0) | 54.4 (20.0, 80.0)                                                                              | 49.3 (21.0, 77.0) | 53.1 (20.0, 80.0) |
| <b>BMI</b>                                |                                                                                  |                   |                   |                                                                                                |                   |                   |
| Mean ± SD                                 | 29.3 ± 6.7                                                                       | 30.2 ± 7.8        | 29.3 ± 6.7        | 29.9 ± 7.7                                                                                     | 29.8 ± 5.7        | 29.8 ± 7.2        |
| <b>Risk for Severe COVID-19</b>           |                                                                                  |                   |                   |                                                                                                |                   |                   |
| At-risk                                   | 3359 (23.9%)                                                                     | 55 (27.0%)        | 3414 (24.0%)      | 43 (26.4%)                                                                                     | 14 (25.5%)        | 57 (26.1%)        |
| Not at-risk                               | 10688 (76.1%)                                                                    | 149 (73.0%)       | 10837 (76.0%)     | 120 (73.6%)                                                                                    | 41 (74.5%)        | 161 (73.9%)       |
| <b>Age, Risk for Severe COVID-19</b>      |                                                                                  |                   |                   |                                                                                                |                   |                   |
| Age < 65 At-risk                          | 2086 (14.9%)                                                                     | 37 (18.1%)        | 2123 (14.9%)      | 29 (17.8%)                                                                                     | 10 (18.2%)        | 39 (17.9%)        |
| Age < 65 Not at-risk                      | 7597 (54.1%)                                                                     | 118 (57.8%)       | 7715 (54.1%)      | 92 (56.4%)                                                                                     | 34 (61.8%)        | 126 (57.8%)       |
| Age ≥ 65                                  | 4364 (31.1%)                                                                     | 49 (24.0%)        | 4413 (31.0%)      | 42 (25.8%)                                                                                     | 11 (20.0%)        | 53 (24.3%)        |
| <b>Sex Assigned at Birth</b>              |                                                                                  |                   |                   |                                                                                                |                   |                   |
| Female                                    | 6783 (48.3%)                                                                     | 100 (49.0%)       | 6883 (48.3%)      | 94 (57.7%)                                                                                     | 23 (41.8%)        | 117 (53.7%)       |
| Male                                      | 7264 (51.7%)                                                                     | 104 (51.0%)       | 7368 (51.7%)      | 69 (42.3%)                                                                                     | 32 (58.2%)        | 101 (46.3%)       |
| <b>Hispanic or Latino Ethnicity</b>       |                                                                                  |                   |                   |                                                                                                |                   |                   |
| Hispanic or Latino                        | 2496 (17.8%)                                                                     | 39 (19.1%)        | 2535 (17.8%)      | 32 (19.6%)                                                                                     | 12 (21.8%)        | 44 (20.2%)        |
| Not Hispanic or Latino                    | 11405 (81.2%)                                                                    | 165 (80.9%)       | 11570 (81.2%)     | 131 (80.4%)                                                                                    | 43 (78.2%)        | 174 (79.8%)       |
| Not reported and unknown                  | 146 (1.0%)                                                                       | 0 (0%)            | 146 (1.0%)        | 0 (0%)                                                                                         | 0 (0%)            | 0 (0%)            |
| <b>Race</b>                               |                                                                                  |                   |                   |                                                                                                |                   |                   |
| White                                     | 11189 (79.7%)                                                                    | 156 (76.5%)       | 11345 (79.6%)     | 136 (83.4%)                                                                                    | 41 (74.5%)        | 177 (81.2%)       |
| Black or African American                 | 1383 (9.8%)                                                                      | 28 (13.7%)        | 1411 (9.9%)       | 14 (8.6%)                                                                                      | 5 (9.1%)          | 19 (8.7%)         |
| Asian                                     | 613 (4.4%)                                                                       | 8 (3.9%)          | 621 (4.4%)        | 4 (2.5%)                                                                                       | 3 (5.5%)          | 7 (3.2%)          |
| American Indian or Alaska Native          | 109 (0.8%)                                                                       | 1 (0.5%)          | 110 (0.8%)        | 1 (0.6%)                                                                                       | 1 (1.8%)          | 2 (0.9%)          |
| Native Hawaiian or Other Pacific Islander | 29 (0.2%)                                                                        | 1 (0.5%)          | 30 (0.2%)         | 2 (1.2%)                                                                                       | 0 (0%)            | 2 (0.9%)          |
| Multiracial                               | 310 (2.2%)                                                                       | 6 (2.9%)          | 316 (2.2%)        | 2 (1.2%)                                                                                       | 3 (5.5%)          | 5 (2.3%)          |
| Other                                     | 267 (1.9%)                                                                       | 4 (2.0%)          | 271 (1.9%)        | 3 (1.8%)                                                                                       | 2 (3.6%)          | 5 (2.3%)          |

|                                         |               |             |               |             |            |             |
|-----------------------------------------|---------------|-------------|---------------|-------------|------------|-------------|
| Not reported and unknown                | 134 (1.0%)    | 0 (0%)      | 134 (0.9%)    | 1 (0.6%)    | 0 (0%)     | 1 (0.5%)    |
| <b>Underrepresented Minority Status</b> |               |             |               |             |            |             |
| White Non-Hispanic                      | 10133 (72.1%) | 140 (68.6%) | 10273 (72.1%) | 115 (70.6%) | 38 (69.1%) | 153 (70.2%) |
| Communities of Color                    | 3914 (27.9%)  | 64 (31.4%)  | 3978 (27.9%)  | 48 (29.4%)  | 17 (30.9%) | 65 (29.8%)  |

This Supplementary Table summarizes the per-protocol boosted cohort, which was randomly sampled within 12 strata defined by enrollment characteristics: Assigned treatment arm × Baseline SARS-CoV-2 naive vs. non-naive status (defined by serostatus and NAAT testing) × Randomization strata (Age < 65 and at-risk, Age < 65 and not at-risk, Age ≥ 65) × Minority status (Minority vs. Non-minority) defined by White Non-Hispanic vs. all others [same as in (2)]. “At Risk” refers to participants believed to be at increased risk of severe COVID-19 illness and comprised six self-reported health/comorbidities, as in (2). “Minority” includes Blacks or African Americans, Hispanics or Latinos, American Indians or Alaska Natives, Native Hawaiians, and other Pacific Islanders. Non-Minority includes all other races with observed race (Asian, Multiracial, White, Other) and observed ethnicity Not Hispanic or Latino. Numbers and percentages are based on inverse probability of sampling weighting.

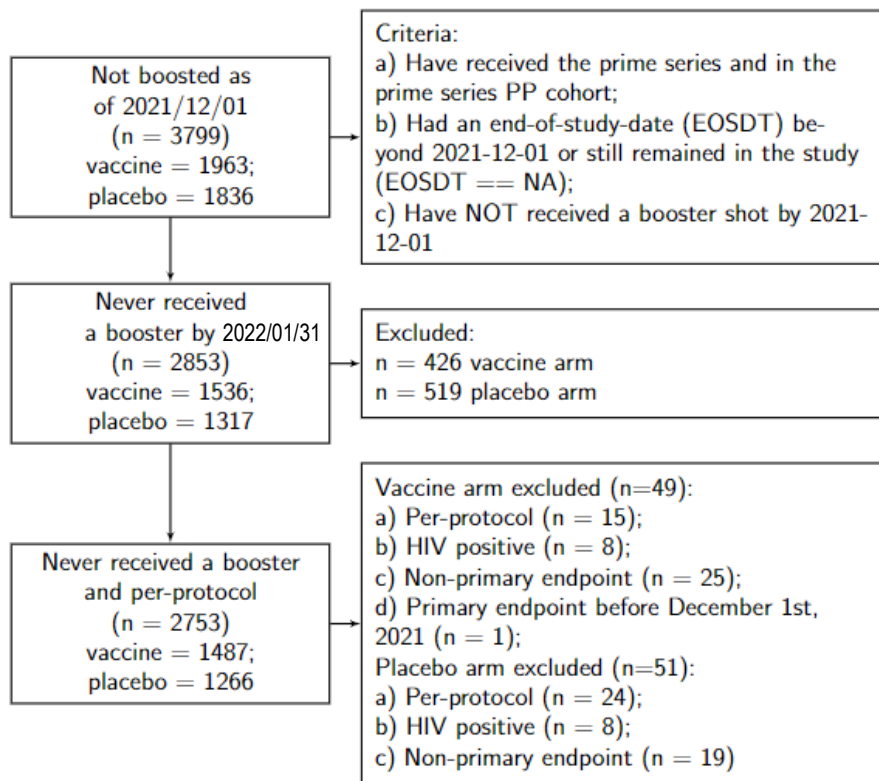

**Supplementary Fig. 3. Flow of baseline-negative per-protocol (according to the definition in ref.<sup>8</sup>) participants who were still in the study and had not received a third (booster) dose as of December 1, 2022 through to inclusion in the exposure-proximal CoP analysis. These 2753 participants were used to enrich the analysis cohort for the exposure-proximal CoP analysis.**

**Supplementary Table 3. Assay limits for A) the PPD pseudovirus neutralizing antibody (nAb) assay and B) the PPD VAC123 MSD multiplex assay by antigen.** Note that the Ancestral strain Spike used for pseudotyping in the nAb assay has the D614G mutation, whereas the Ancestral strain Spike used in the bAb assay does not (D614).

| <b>A</b>                                  |                               |                        |
|-------------------------------------------|-------------------------------|------------------------|
| <b>Neutralizing antibody (nAb) assay</b>  |                               |                        |
|                                           | Ancestral strain <sup>1</sup> | Omicron BA.1           |
| LLOQ (AU/ml)                              | 10                            | 8                      |
| ULOQ (AU/ml)                              | 281,600                       | 24,503                 |
| <b>B</b>                                  |                               |                        |
| <b>Binding antibody assay (Spike IgG)</b> |                               |                        |
|                                           | Ancestral strain              | Omicron BA.1/B.1.1.529 |
| LLOQ <sup>2</sup> (AU/ml)                 | 69                            | 102                    |
| ULOQ <sup>3</sup> (AU/ml)                 | 14,400,000                    | 1,180,000              |

<sup>1</sup>For ancestral strain nAbs, the units AU/ml can be transformed to International Units (IU50)/ml (see SAP).

<sup>2</sup>LLOQs were taken as the LLOQs for the lowest dilution (1:500).

<sup>3</sup>ULOQs were taken as the ULOQs for the highest dilution (1:500,000).

For all assays, values < LLOQ were set to LLOQ/2 and for the nAb assay, values > ULOQ were set to ULOQ. AU = arbitrary units.

**Supplementary Table 4. BD1 Ancestral strain neutralizing antibody (nAb) and BD1 Spike IgG-Ancestral strain binding antibody (bAb) response rates and geometric means stratified by Omicron COVID-19 case vs. non-case and by SARS-CoV-2 naive vs. non-naive status in the per-protocol boosted cohort, pooled across the original-vaccine and crossover-vaccine arms**

| Status <sup>3</sup> | Marker                          | Measurement | Omicron Cases <sup>1</sup> |                                        |                                             | Non-Cases <sup>2</sup> |                                        |                                             | Comparison                                                               |                                                             |
|---------------------|---------------------------------|-------------|----------------------------|----------------------------------------|---------------------------------------------|------------------------|----------------------------------------|---------------------------------------------|--------------------------------------------------------------------------|-------------------------------------------------------------|
|                     |                                 |             | N <sup>4</sup>             | Response Rate <sup>5</sup><br>(95% CI) | GMC or GMT (AU/ml) <sup>6</sup><br>(95% CI) | N <sup>4</sup>         | Response Rate <sup>5</sup><br>(95% CI) | GMC or GMT<br>(AU/ml) <sup>6</sup> (95% CI) | Response Rate<br>Difference<br>(Omicron Cases-<br>Non-Cases)<br>(95% CI) | Ratio of GM<br>(Omicron<br>Cases/Non-<br>Cases)<br>(95% CI) |
| SARS-CoV-2 naive    | Ancestral strain nAbs           | BD1         | 79                         | 100%<br>(100%, 100%)                   | 124<br>(89.7, 170)                          | 84                     | 99.7%<br>(98.1%, 100%)                 | 114<br>(75.9, 173)                          | 0.003<br>(0, 0.019)                                                      | 1.08<br>(0.64, 1.82)                                        |
| SARS-CoV-2 naive    | Spike IgG-Ancestral strain bAbs | BD1         | 79                         | 100%<br>(100%, 100%)                   | 19100.77<br>(13777.90, 26480.05)            | 84                     | 100%<br>(100%, 100%)                   | 18213.80<br>(14060.12, 23594.56)            | 0<br>(0, 0)                                                              | 1.05<br>(0.69, 1.59)                                        |
| Non-Naive           | Ancestral strain nAbs           | BD1         | 32                         | 100%<br>(100%, 100%)                   | 437<br>(247, 770)                           | 23                     | 100%<br>(100%, 100%)                   | 148<br>(82.3, 264)                          | 0<br>(0, 0)                                                              | 2.96<br>(1.31, 6.68)                                        |
| Non-Naive           | Spike IgG-Ancestral strain bAbs | BD1         | 32                         | 100%<br>(100%, 100%)                   | 51318<br>(30442, 86512)                     | 23                     | 100%<br>(100%, 100%)                   | 24521<br>(16224, 37062)                     | 0<br>(0, 0)                                                              | 2.09<br>(1.08, 4.07)                                        |

<sup>1</sup>Omicron case = COVID-19 Omicron BA.1 endpoint that occurred in the interval [ $\geq 7$  days post BD29 AND  $\geq$  December 1, 2021 to April 5, 2022 data cutoff].

<sup>2</sup>Non-case = No acquirement of COVID-19 (of any strain) in the interval [BD1, April 5, 2022 data cutoff].

<sup>3</sup>SARS-CoV-2 naive = No evidence of SARS-CoV-2 infection from enrollment through to BD1; Non-naive = Any evidence of SARS-CoV-2 infection in the interval [ $\geq 14$  days after the original two-dose series, BD1]

<sup>4</sup>N is the number of cases sampled into the subcohort within baseline covariate strata.

<sup>5</sup>Definitions of “responder” for each BD1 marker: positive (quantifiable) response defined as BD1 Ancestral strain nAb  $\geq 10$  AU/ml; positive response defined as BD1 Spike IgG-Ancestral strain bAb  $\geq 69$  AU/ml.

<sup>6</sup>For ancestral strain nAbs, the units AU/ml can be transformed to International Units (IU50)/ml (see SAP).

AU/ml, arbitrary units/ml; CI: confidence interval; GMC: geometric mean concentration; GMT: geometric mean titer.



A

Participants Assigned Female Sex at Birth

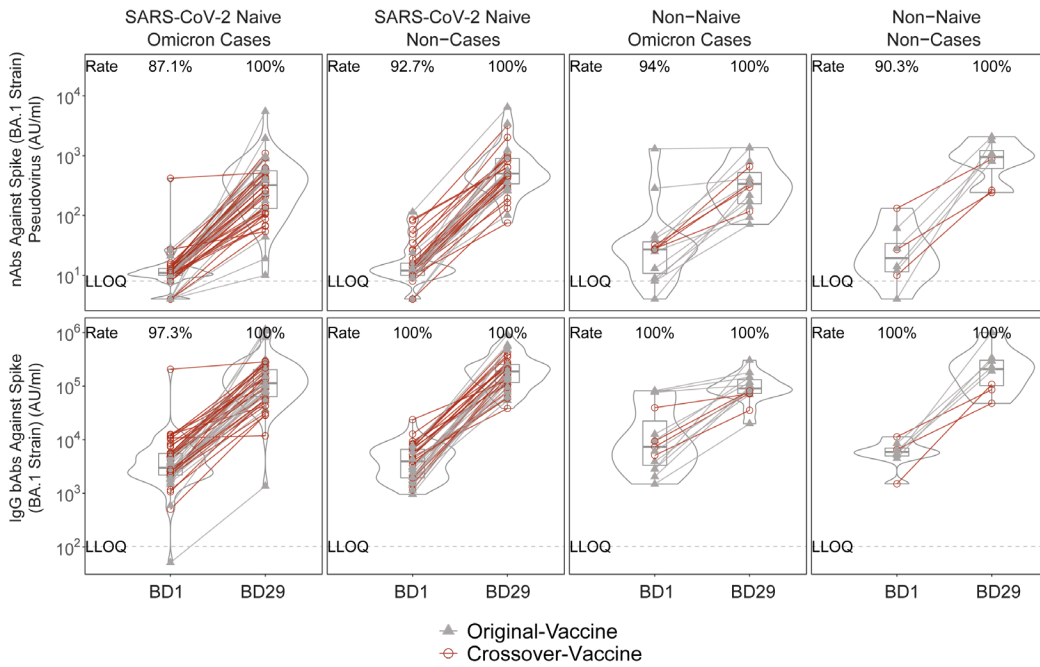

B

Participants Assigned Male Sex at Birth

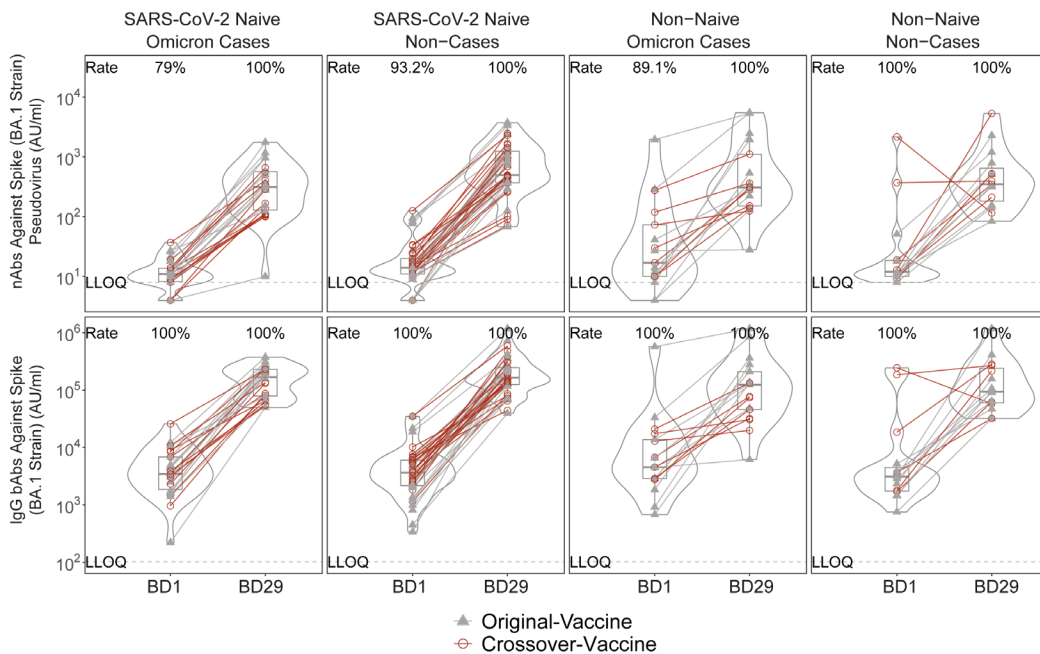

**Supplementary Fig. 4. Distributions of BD1 and BD29 neutralizing antibody (nAb) titer against Spike (BA.1 strain) pseudovirus and IgG binding antibody (bAb) concentration against Spike (BA.1 strain), stratified by Omicron COVID-19 case vs. non-case status and by SARS-CoV-2 naive vs. non-naive status, shown separately in participants assigned (A)**

**female or (B) male sex at birth.** Data points are from per-protocol boosted participants in the original-vaccine (filled triangles) or crossover-vaccine (open circles) arm, with lines (gray: original-vaccine arm; red: crossover-vaccine arm) connecting the BD1 and BD29 data points for an individual participant. Numbers of participants shown are: (A) (Female participants; all numbers are the same for both nAb BA.1 and Spike IgG BA.1): Naive Omicron cases: BD1 N=53, BD29=53; Naive non-cases: BD1 N=41, BD29 N=41; Non-naive Omicron cases: BD1 N=15, BD29 N=15; Non-naive non-case: BD1 N=8, BD29 N=8. (B) (Male participants; all numbers are the same for both nAb BA.1 and Spike IgG BA.1): Naive Omicron cases: BD1 N=26, BD29=26; Naive non-cases: BD1 N=43, BD29 N=43; Non-naive Omicron cases: BD1 N=17, BD29 N=17; Non-naive non-case: BD1 N=15, BD29 N=15. The violin plots contain interior box plots with upper and lower horizontal edges representing the 25th and 75th percentiles of antibody level and middle line representing the 50th percentile. The vertical bars represent the distance from the 25th (or 75th) percentile of antibody level and the minimum (or maximum) antibody level within the 25th (or 75th) percentile of antibody level minus (or plus) 1.5 times the interquartile range. Each side shows a rotated probability density (estimated by a kernel density estimator with a default Gaussian kernel) of the data. Positive response rates were computed with inverse probability of sampling weighting. LLOQ, lower limit of quantification. AU/ml, arbitrary units/ml. LLOQ = 8 AU/ml for nAb BA.1 and 102 AU/ml for Spike IgG BA.1. Positive (quantifiable) response for BA.1 nAb at a given timepoint was defined by value  $\geq$  LLOQ at that timepoint. Positive response for Spike IgG-BA.1 bAb at a given timepoint was defined by value  $\geq$  LLOQ at that timepoint. Omicron Case = COVID-19 endpoint in the interval  $[\geq 7$  days post BD29 AND  $\geq$  December 1, 2021 to April 5, 2022 (data cutoff date)]. Non-case = Did not acquire COVID-19 (of any strain) in the interval [BD1 to April 5, 2022]. SARS-CoV-2 naive = No evidence of SARS-CoV-2 infection from enrollment through to BD1; Non-naive = Any evidence of SARS-CoV-2 infection in the interval  $[\geq 14$  days after the first two doses of mRNA-1273, BD1].

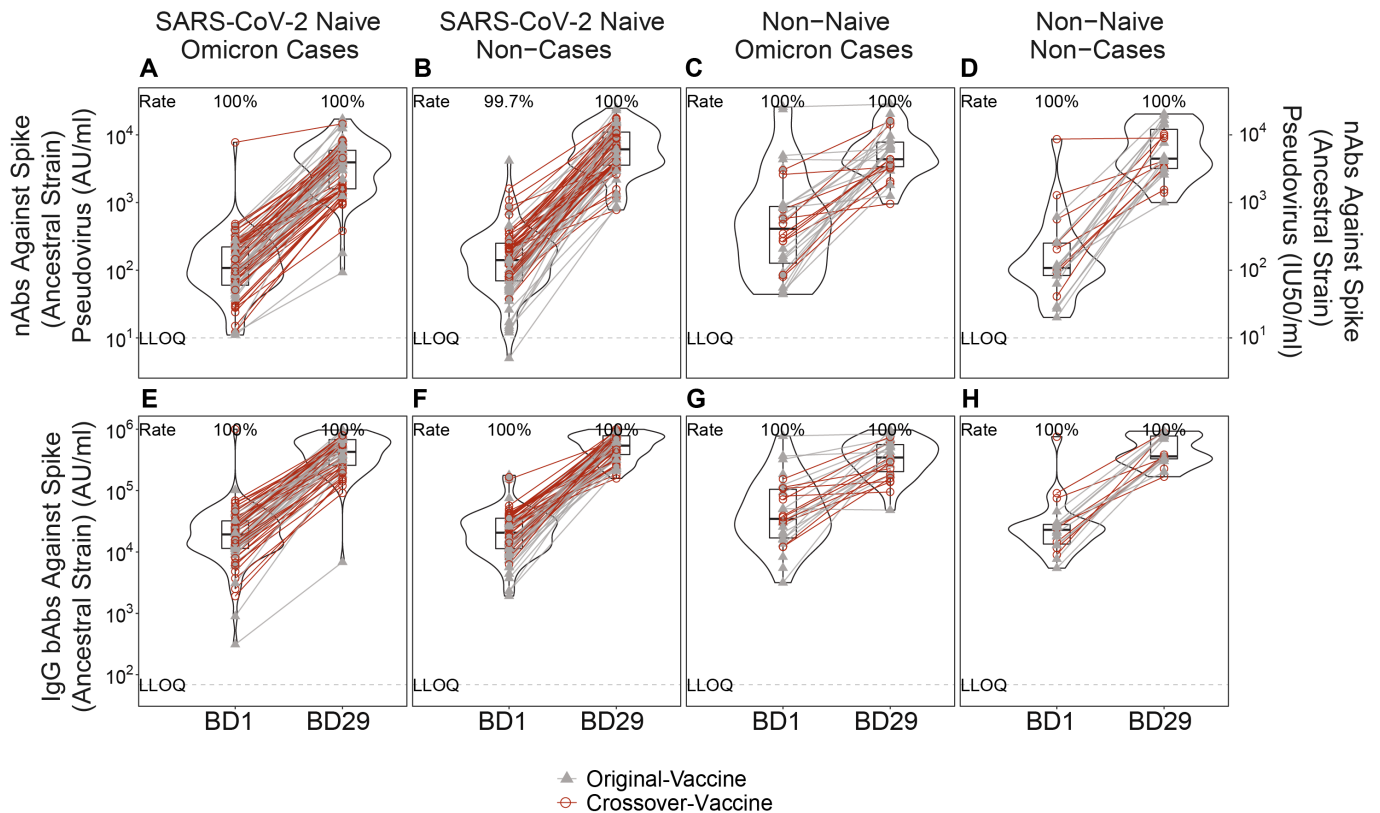

**Supplementary Fig. 5. Distributions of BD1 and BD29 (A-D) Ancestral strain neutralizing antibody (nAb) titer and (E-H) Spike IgG-Ancestral strain binding antibody (bAb) concentration, stratified by Omicron COVID-19 case vs. non-case status and by SARS-CoV-2 naive vs. non-naive status.** Data points are from per-protocol boosted participants in the original-vaccine (filled triangles) or crossover-vaccine (open circles) arm, with lines (gray: original-vaccine arm; red: crossover-vaccine arm) connecting the BD1 and BD29 data points for an individual participant (A, E: n=79; B, F: n=84; C, G: 32; D, H: n=23). The violin plots contain interior box plots with upper and lower horizontal edges representing the 25<sup>th</sup> and 75<sup>th</sup> percentiles of antibody level and middle line representing the 50<sup>th</sup> percentile. The vertical bars represent the distance from the 25<sup>th</sup> (or 75<sup>th</sup>) percentile of antibody level and the minimum (or maximum) antibody level within the 25<sup>th</sup> (or 75<sup>th</sup>) percentile of antibody level minus (or plus) 1.5 times the interquartile range. Each side shows a rotated probability density (estimated by a kernel density estimator with a default Gaussian kernel) of the data. Positive response rates were computed with inverse probability of sampling weighting. LLOQ, lower limit of quantification. LLOQ = 10 AU/ml for Ancestral strain nAbs and 69 AU/ml for Spike IgG-Ancestral strain bAbs. Positive response for Ancestral strain nAbs at a given timepoint was defined by value  $\geq$  LLOQ at that timepoint. Positive response for Spike IgG-Ancestral strain bAbs at a given timepoint was defined by value  $\geq$  LLOQ at that timepoint. Omicron Case = COVID-19 endpoint in the interval [ $\geq$  7 days post BD29 AND  $\geq$  December 1, 2021 to April 5, 2022 data cutoff date]. Non-case =

Did not acquire COVID-19 (of any strain) in the interval [BD1 to April 5, 2022]. SARS-CoV-2 naive = No evidence of SARS-CoV-2 infection from enrollment through to BD1; Non-naive = Any evidence of SARS-CoV-2 infection in the interval  $\geq 14$  days after the first two doses of mRNA-1273, BD1]. For ancestral strain nAbs, the units AU/ml can be transformed to International Units (IU50)/ml (see SAP), shown on the right-hand y-axis labels.

**Supplementary Table 5. BD29 and Fold-Rise Ancestral strain neutralizing antibody (nAb) and Spike IgG-Ancestral strain binding antibody (bAb) response rates and geometric means by Omicron COVID-19 case vs. non-case status and by SARS-CoV-2 naive vs. non-naive status in the per-protocol boosted cohort, pooled across the original-vaccine and crossover-vaccine arms**

| Status <sup>3</sup> | Marker                          | Measurement | Omicron Cases <sup>1</sup> |                                        |                                             | Non-Cases <sup>2</sup> |                                        |                                          | Comparison                                                        |                                                   |
|---------------------|---------------------------------|-------------|----------------------------|----------------------------------------|---------------------------------------------|------------------------|----------------------------------------|------------------------------------------|-------------------------------------------------------------------|---------------------------------------------------|
|                     |                                 |             | N <sup>4</sup>             | Response Rate <sup>5</sup><br>(95% CI) | GMC or GMT (AU/ml) <sup>6</sup><br>(95% CI) | N <sup>4</sup>         | Response Rate <sup>5</sup><br>(95% CI) | GMC or GMT (AU/ml) (95% CI) <sup>6</sup> | Response Rate Difference<br>(Omicron Cases-Non-Cases)<br>(95% CI) | Ratio of GM (Omicron Cases/Non-Cases)<br>(95% CI) |
| SARS-CoV-2 Naive    | Ancestral Strain nAbs           | BD29        | 79                         | 100% (100%, 100%)                      | 3234<br>(2385, 4387)                        | 84                     | 100% (100%, 100%)                      | 5492<br>(3866, 7802)                     | 0 (0, 0)                                                          | 0.59<br>(0.37, 0.94)                              |
| SARS-CoV-2 Naive    | Spike IgG-Ancestral Strain bAbs | BD29        | 79                         | 100% (100%, 100%)                      | 467178 (364292, 599121)                     | 84                     | 100% (100%, 100%)                      | 652950 (516281, 825799)                  | 0 (0, 0)                                                          | 0.72 (0.51, 1.01)                                 |
| SARS-CoV-2 Naive    | Ancestral Strain nAbs           | Fold-Rise   | 79                         | -                                      | 26.2<br>(21.1, 32.4)                        | 84                     | -                                      | 48.0<br>(37.4, 61.6)                     | -                                                                 | 0.54<br>(0.39, 0.76)                              |
| SARS-CoV-2 Naive    | Spike IgG-Ancestral Strain bAbs | Fold-Rise   | 79                         | -                                      | 24.5<br>(20.0, 30.0)                        | 84                     | -                                      | 35.9<br>(29.4, 43.7)                     | -                                                                 | 0.68<br>(0.51, 0.91)                              |
| Non-Naive           | Ancestral Strain nAbs           | BD29        | 32                         | 100% (100%, 100%)                      | 5536<br>(4012, 7637)                        | 23                     | 100% (100%, 100%)                      | 5759<br>(3526, 9407)                     | 0 (0, 0)                                                          | 0.96<br>(0.53, 1.73)                              |
| Non-Naive           | Spike IgG-Ancestral Strain bAbs | BD29        | 32                         | 100% (100%, 100%)                      | 419795<br>(301040, 585399)                  | 23                     | 100% (100%, 100%)                      | 619269<br>(441303, 869004)               | 0 (0, 0)                                                          | 0.68<br>(0.42, 1.09)                              |
| Non-Naive           | Ancestral Strain nAbs           | Fold-Rise   | 32                         | -                                      | 12.7<br>(7.5, 21.6)                         | 23                     | -                                      | 39.0<br>(23.9, 63.9)                     | -                                                                 | 0.32<br>(0.16, 0.67)                              |
| Non-Naive           | Spike IgG-Ancestral Strain bAbs | Fold-Rise   | 32                         | -                                      | 8.2<br>(4.7, 14.1)                          | 23                     | -                                      | 25.3<br>(16.7, 38.2)                     | -                                                                 | 0.32<br>(0.16, 0.64)                              |

<sup>1</sup>Omicron case = COVID-19 Omicron BA.1 endpoint that occurred in the interval [ $\geq 7$  days post BD29 AND  $\geq$  December 1, 2021 to April 5, 2022 data cutoff].

<sup>2</sup>Non-case = No acquirement of COVID-19 (of any strain) in the interval [BD1, April 5, 2022 data cutoff].

<sup>3</sup>SARS-CoV-2 naive = No evidence of SARS-CoV-2 infection from enrollment through to BD1; Non-naive = Any evidence of SARS-CoV-2 infection in the interval [ $\geq 14$  days after the original two-dose series, BD1]

<sup>4</sup>N is the number of cases sampled into the subcohort within baseline covariate strata.

<sup>5</sup>Definitions of “responder” for the BD29 markers: positive (quantifiable) response defined as BD29 Ancestral strain nAbs  $\geq 10$  AU/ml; positive response defined as BD29 Spike IgG-Ancestral strain bAbs  $\geq 69$  AU/ml.

<sup>6</sup>For ancestral strain nAbs, the units AU/ml can be transformed to International Units (IU50)/ml (see SAP).

AU/ml, arbitrary units/ml; CI: confidence interval; GMC: geometric mean concentration; GMT: geometric mean titer.

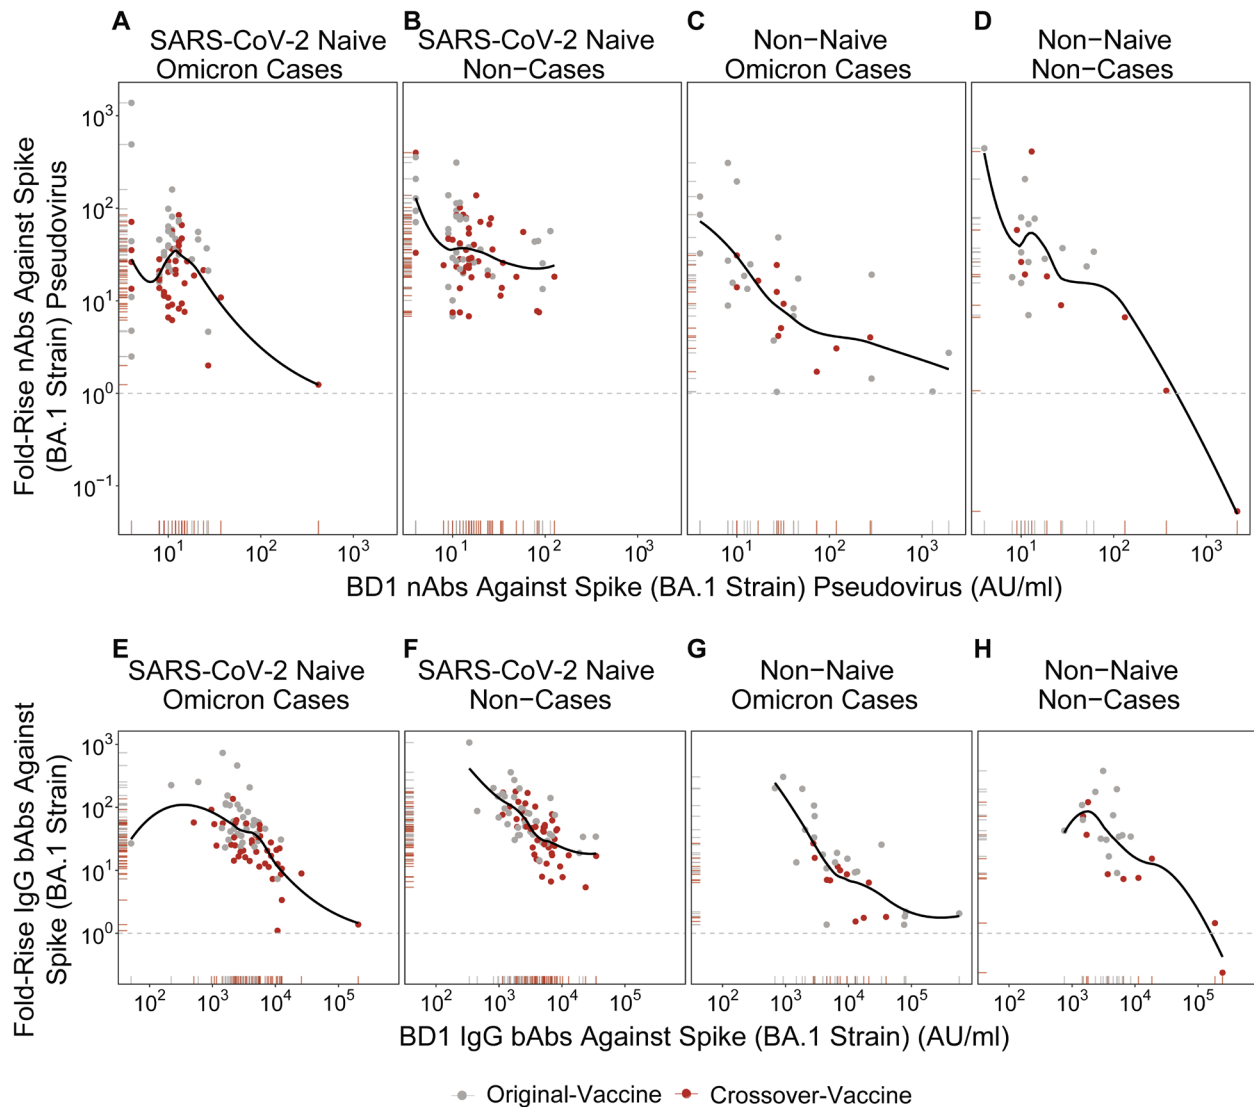

**Supplementary Fig. 6. Scatterplots with rugs of BD1 and Fold-Rise (BD29/BD1) (A-D) BA.1 strain neutralizing antibody (nAb) and (E-F) Spike IgG-BA.1 strain binding antibody (bAb) level, stratified by Omicron COVID-19 case vs. non-case status and by SARS-CoV-2 naive vs. non-naive status.** Data points are from per-protocol boosted participants in the original-vaccine (gray) or crossover-vaccine (red) arm (A, E: n=79; B, F: n=84; C, G: 32; D, H: n=23). The black lines are smooth curves delineating the relationship between the two variables and were fitted using the LOESS method/local regression method. Omicron Case = Omicron COVID-19 endpoint in the interval [ $\geq 7$  days post BD29 AND  $\geq$  December 1, 2021 to April 5, 2022 data cutoff date]. Non-case = Did not acquire COVID-19 (of any strain) in the interval [BD1 to April 5, 2022]. SARS-CoV-2 naive = No evidence of SARS-CoV-2 infection from enrollment through to BD1; Non-naive = Any evidence of SARS-CoV-2 infection in the interval [ $\geq 14$  days after the first two doses of mRNA-1273, BD1].

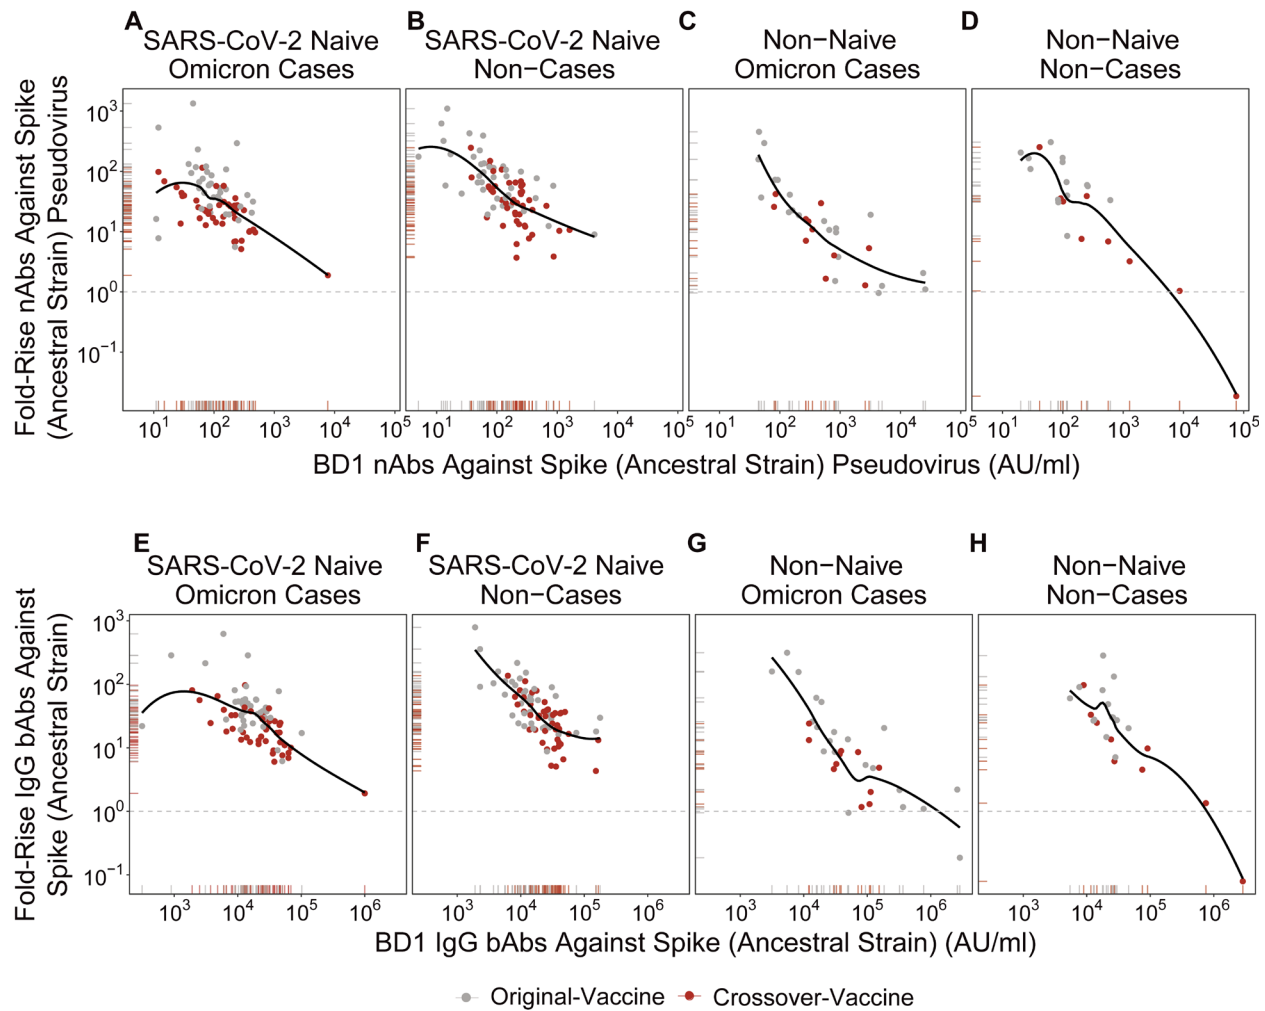

**Supplementary Fig. 7. Scatterplots with rugs of BD1 and Fold-Rise (BD29/BD1) (A-D) Ancestral strain neutralizing antibody (nAb) and (E-F) Spike IgG-Ancestral strain binding antibody (bAb) level, stratified by Omicron COVID-19 case vs. non-case status and by SARS-CoV-2 naive vs. non-naive status.** Data points are from per-protocol boosted participants in the original-vaccine (gray) or crossover-vaccine (red) arm (A, E: n=79; B, F: n=84; C, G: 32; D, H: n=23).. The black lines are smooth curves delineating the relationship between the two variables and were fitted using the LOESS method/local regression method. Omicron Case = Omicron COVID-19 endpoint in the interval [ $\geq 7$  days post BD29 AND  $\geq$  December 1, 2021 to April 5, 2022 data cutoff date]. Non-case = Did not acquire COVID-19 (of any strain) in the interval [BD1 to April 5, 2022]. SARS-CoV-2 naive (N) = No evidence of SARS-CoV-2 infection from enrollment through to BD1; Non-naive (NN) = Any evidence of SARS-CoV-2 infection in the interval [ $\geq 14$  days after the first two doses of mRNA-1273, BD1].



**Supplementary Table 6. BD29 and BD29/BD1 Fold-Rise neutralizing antibody (nAb) and binding antibody (bAb) response rates and geometric means in non-cases in the per-protocol boosted cohort, shown separately by SARS-CoV-2 naive vs. non-naive status and by study arm**

| Arm                     | Status           | Marker                          | Visit     | N    | Response Rate (95% CI) | GMC or GMT (AU/ml) <sup>1</sup> (95% CI) |
|-------------------------|------------------|---------------------------------|-----------|------|------------------------|------------------------------------------|
| <b>BA.1 Strain</b>      |                  |                                 |           |      |                        |                                          |
| Original-Vaccine        | SARS-CoV-2 Naive | BA.1 Strain nAbs                | BD29      | 6606 | 100 (100, 100)         | 527 (276, 1006)                          |
| Original-Vaccine        | SARS-CoV-2 Naive | Spike IgG-BA.1 Strain bAbs      | BD29      | 6606 | 100 (100, 100)         | 194468 (134566, 281036)                  |
| Original-Vaccine        | SARS-CoV-2 Naive | BA.1 Strain nAbs                | Fold-Rise | 6606 | -                      | 37.4 (21.6, 64.8)                        |
| Original-Vaccine        | SARS-CoV-2 Naive | Spike IgG-BA.1 Strain bAbs      | Fold-Rise | 6606 | -                      | 74.8 (58.1, 96.4)                        |
| Original-Vaccine        | Non-Naive        | BA.1 Strain nAbs                | BD29      | 134  | 100 (100, 100)         | 616 (336, 1131)                          |
| Original-Vaccine        | Non-Naive        | Spike IgG-BA.1 Strain bAbs      | BD29      | 134  | 100 (100, 100)         | 165136 (98711, 276261)                   |
| Original-Vaccine        | Non-Naive        | BA.1 Strain nAbs                | Fold-Rise | 134  | -                      | 40.3 (26.5, 61.4)                        |
| Original-Vaccine        | Non-Naive        | Spike IgG-BA.1 Strain bAbs      | Fold-Rise | 134  | -                      | 46.5 (32.2, 67.3)                        |
| Crossover-Vaccine       | SARS-CoV-2 Naive | BA.1 Strain nAbs                | BD29      | 6164 | 100 (100, 100)         | 455 (329, 629)                           |
| Crossover-Vaccine       | SARS-CoV-2 naive | Spike IgG-BA.1 Strain bAbs      | BD29      | 6164 | 100 (100, 100)         | 148498 (117406, 187823)                  |
| Crossover-Vaccine       | SARS-CoV-2 Naive | BA.1 Strain nAbs                | Fold-Rise | 6164 | -                      | 30.1 (21.8, 41.6)                        |
| Crossover-Vaccine       | SARS-CoV-2 Naive | Spike IgG-BA.1 Strain bAbs      | Fold-Rise | 6164 | -                      | 33.7 (24.7, 46.0)                        |
| Crossover-Vaccine       | Non-Naive        | BA.1 Strain nAbs                | BD29      | 35   | 100 (100, 100)         | 432 (212, 879)                           |
| Crossover-Vaccine       | Non-Naive        | Spike IgG-BA.1 Strain bAbs      | BD29      | 35   | 100 (100, 100)         | 98349 (58932, 164131)                    |
| Crossover-Vaccine       | Non-Naive        | BA.1 Strain nAbs                | Fold-Rise | 35   | -                      | 9.7 (1.9, 49.4)                          |
| Crossover-Vaccine       | Non-Naive        | Spike IgG-BA.1 Strain bAbs      | Fold-Rise | 35   | -                      | 9.8 (2.8, 33.9)                          |
| <b>Ancestral strain</b> |                  |                                 |           |      |                        |                                          |
| Original-Vaccine        | SARS-CoV-2 Naive | Ancestral Strain nAbs           | BD29      | 6606 | 100 (100, 100)         | 5859 (3101, 11067)                       |
| Original-Vaccine        | SARS-CoV-2 Naive | Spike IgG-Ancestral Strain bAbs | BD29      | 6606 | 100 (100, 100)         | 715670 (471776, 1085650)                 |
| Original-Vaccine        | SARS-CoV-2 Naive | Ancestral Strain nAbs           | Fold-Rise | 6606 | -                      | 77.6 (52.4, 115)                         |

|                   |                  |                                 |           |      |                |                             |
|-------------------|------------------|---------------------------------|-----------|------|----------------|-----------------------------|
| Original-Vaccine  | SARS-CoV-2 Naive | Spike IgG-Ancestral Strain bAbs | Fold-Rise | 6606 | -              | 53.1<br>(38.8, 72.8)        |
| Original-Vaccine  | Non-Naive        | Ancestral Strain nAbs           | BD29      | 134  | 100 (100, 100) | 6297<br>(3433, 11550)       |
| Original-Vaccine  | Non-Naive        | Spike IgG-Ancestral Strain bAbs | BD29      | 134  | 100 (100, 100) | 682910<br>(452891, 1029752) |
| Original-Vaccine  | Non-Naive        | Ancestral Strain nAbs           | Fold-Rise | 134  | -              | 61.4<br>(41.6, 90.8)        |
| Original-Vaccine  | Non-Naive        | Spike IgG-Ancestral Strain bAbs | Fold-Rise | 134  | -              | 35.6<br>(24.7, 51.2)        |
| Crossover-Vaccine | SARS-CoV-2 Naive | Ancestral Strain nAbs           | BD29      | 6164 | 100 (100, 100) | 5125<br>(3859, 6806)        |
| Crossover-Vaccine | SARS-CoV-2 Naive | Spike IgG-Ancestral Strain bAbs | BD29      | 6164 | 100 (100, 100) | 591821<br>(474520, 738120)  |
| Crossover-Vaccine | SARS-CoV-2 Naive | Ancestral Strain nAbs           | Fold-Rise | 6164 | -              | 28.7<br>(20.3, 40.6)        |
| Crossover-Vaccine | SARS-CoV-2 Naive | Spike IgG-Ancestral Strain bAbs | Fold-Rise | 6164 | -              | 23.5<br>(17.7, 31.3)        |
| Crossover-Vaccine | Non-Naive        | Ancestral Strain nAbs           | BD29      | 35   | 100 (100, 100) | 4092<br>(2534, 6608)        |
| Crossover-Vaccine | Non-Naive        | Spike IgG-Ancestral Strain bAbs | BD29      | 35   | 100 (100, 100) | 425821<br>(283019, 640676)  |
| Crossover-Vaccine | Non-Naive        | Ancestral Strain nAbs           | Fold-Rise | 35   | -              | 6.9<br>(1.2, 40.3)          |
| Crossover-Vaccine | Non-Naive        | Spike IgG-Ancestral Strain bAbs | Fold-Rise | 35   | -              | 6.8<br>(1.8, 25.9)          |

---

Fold-Rise = BD29/BD1. N is the number of cases sampled into the subcohort within baseline covariate strata. Non-case = No acquisitions of COVID-19 (of any strain) in the interval [BD1, data cutoff date]. SARS-CoV-2 naive = No evidence of SARS-CoV-2 infection from enrollment through to BD1. Non-naive = Any evidence of SARS-CoV-2 infection in the interval  $\geq 14$  days after the original 2-dose series, BD1]

<sup>1</sup>For ancestral strain nAbs, the units AU/ml can be transformed to International Units (IU50)/ml (see SAP).

GMC: geometric mean concentration; GMT: geometric mean titer.

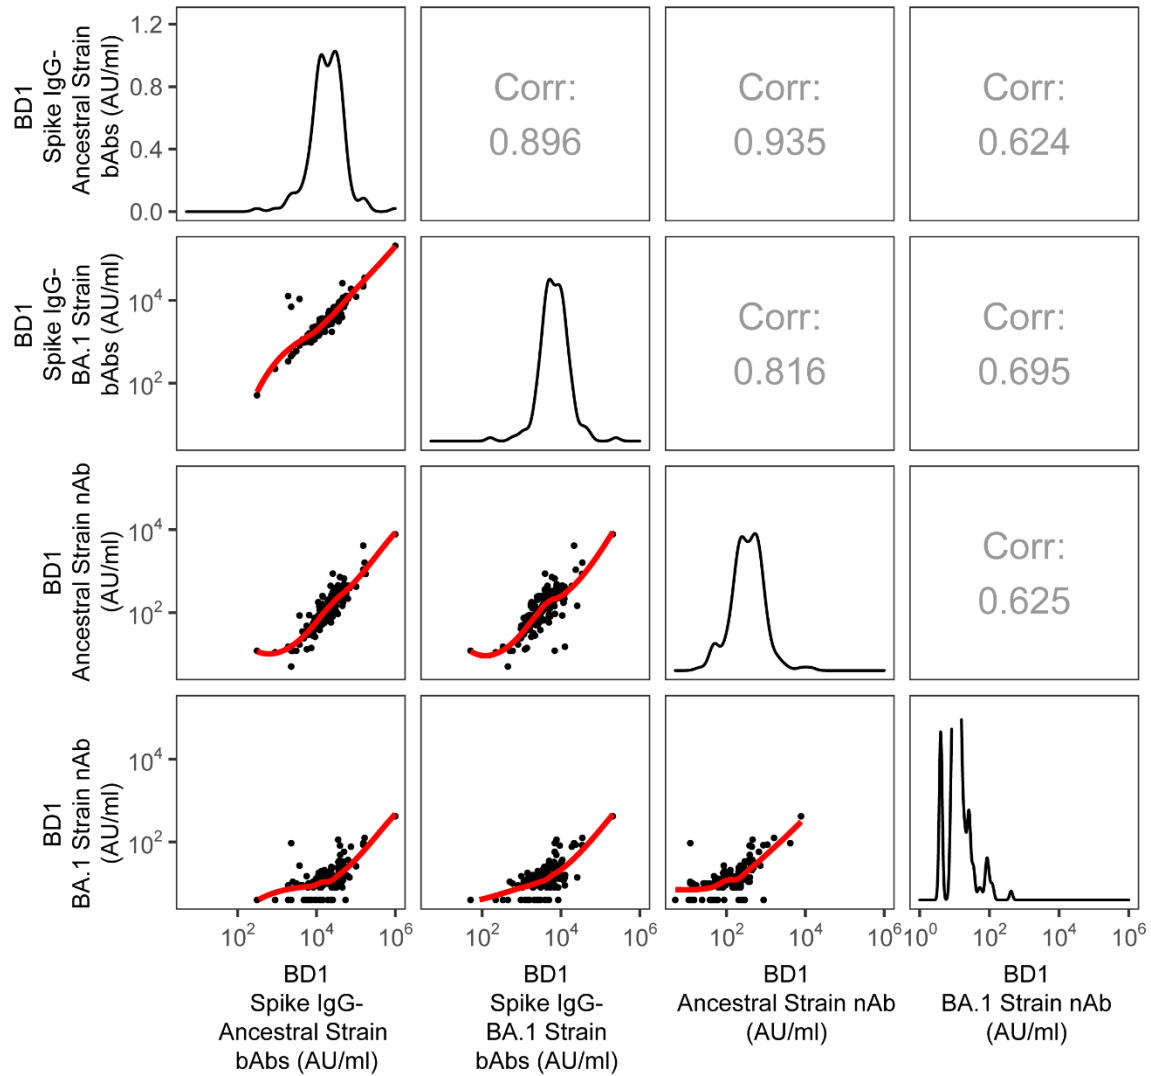

**Supplementary Fig. 8. Correlations of BD1 antibody markers among SARS-CoV-2 naive participants in the per-protocol boosted cohort (n = 218).** Corr = Inverse probability weight adjusted Spearman's rank correlation coefficient.  $P < 0.001$  for all pairwise correlations. For ancestral strain nAbs, the units AU/ml can be transformed to International Units (IU50)/ml (see SAP).

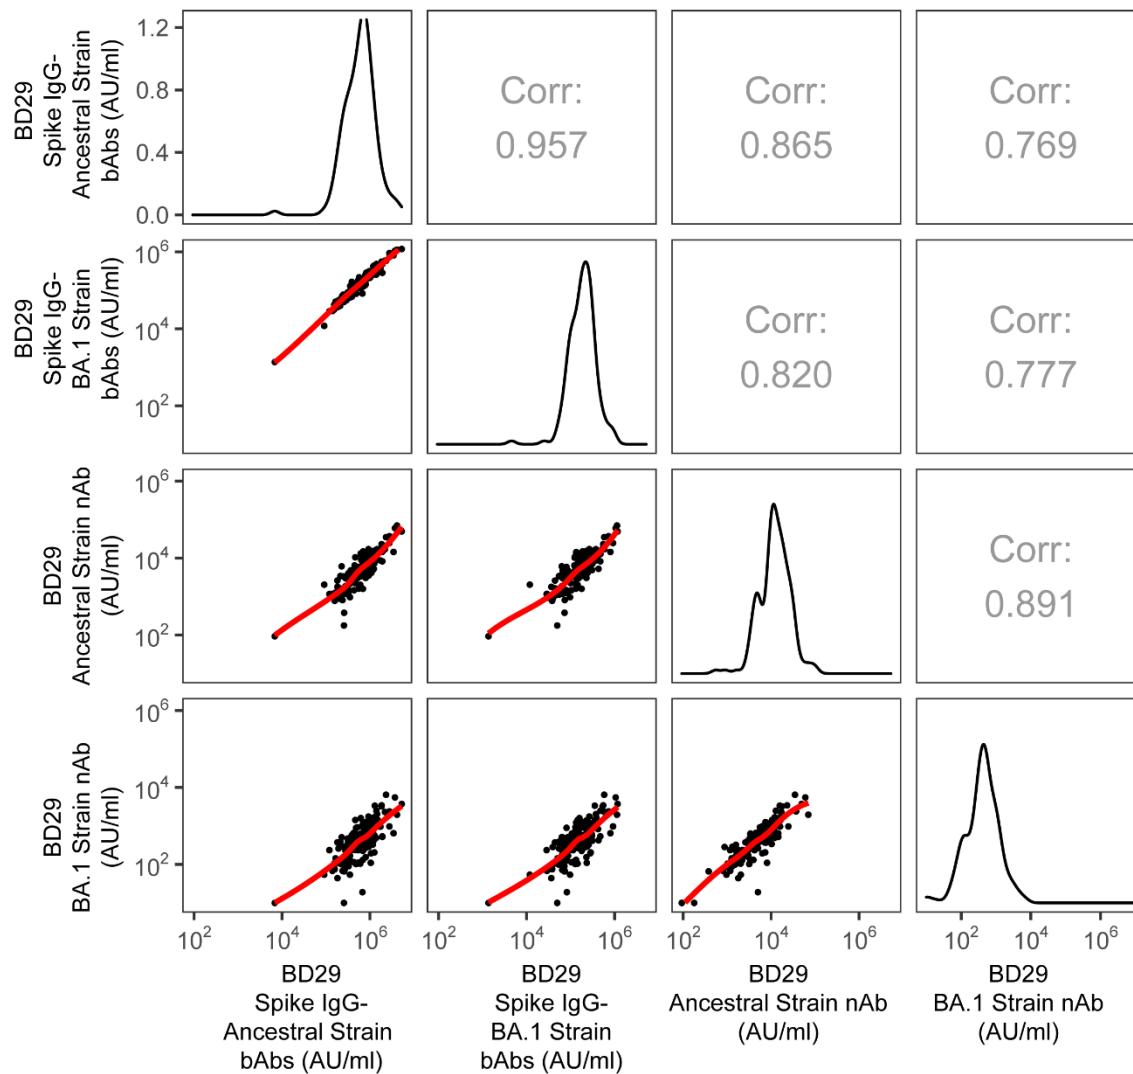

**Supplementary Fig. 9. Correlations of BD29 antibody markers among SARS-CoV-2 naive participants in the per-protocol boosted cohort (n = 218).** Corr = Inverse probability weight adjusted Spearman's rank correlation coefficient.  $P < 0.001$  for all pairwise correlations. For ancestral strain nAbs, the units AU/ml can be transformed to International Units (IU50)/ml (see SAP).

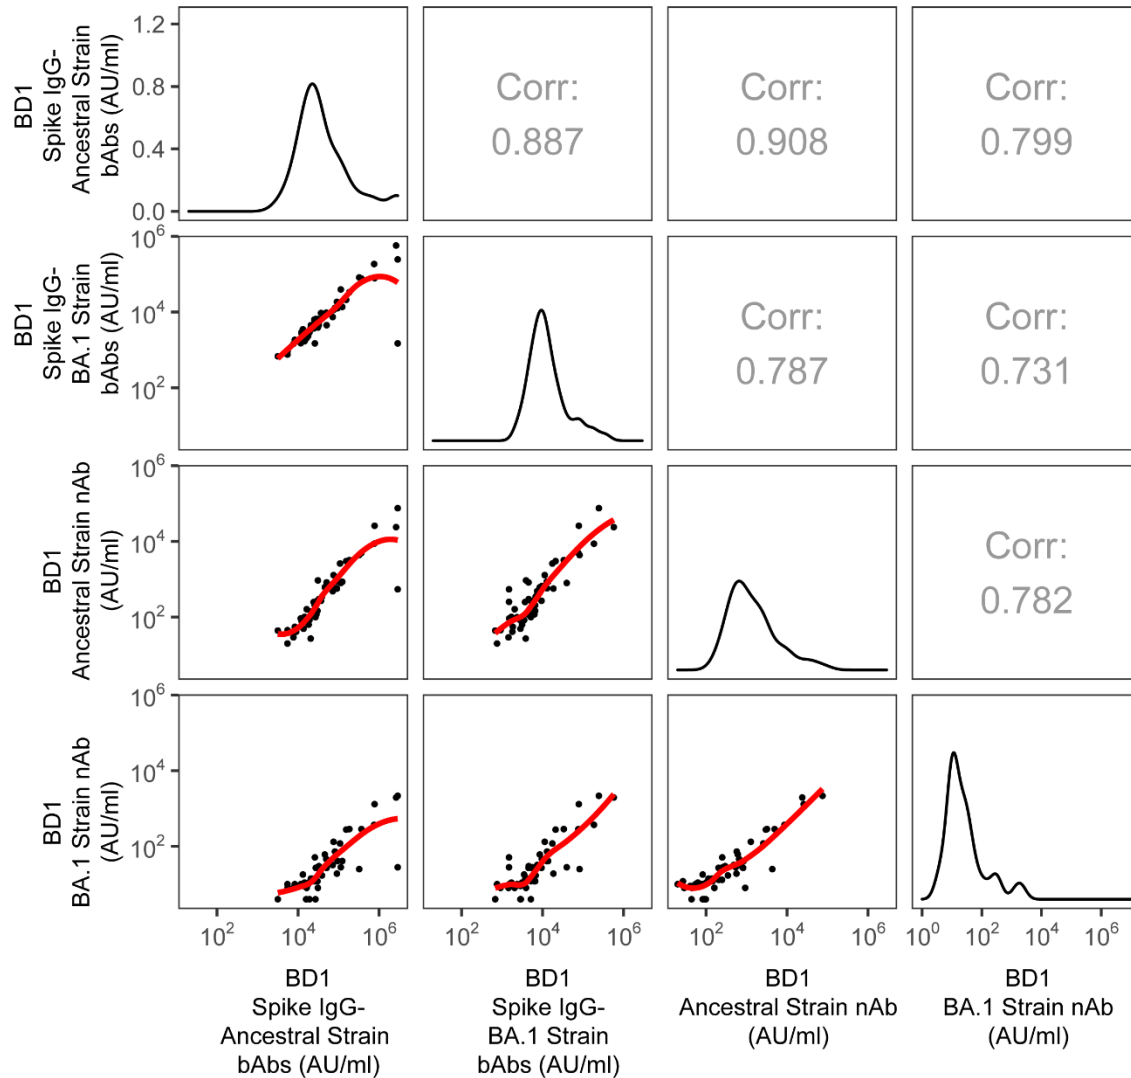

**Supplementary Fig. 10. Correlations of BD1 antibody markers among non-naive participants in the per-protocol boosted cohort (n = 55).** Corr = Inverse probability weight adjusted Spearman's rank correlation coefficient.  $P < 0.001$  for all pairwise correlations. For ancestral strain nAbs, the units AU/ml can be transformed to International Units (IU50)/ml (see SAP).

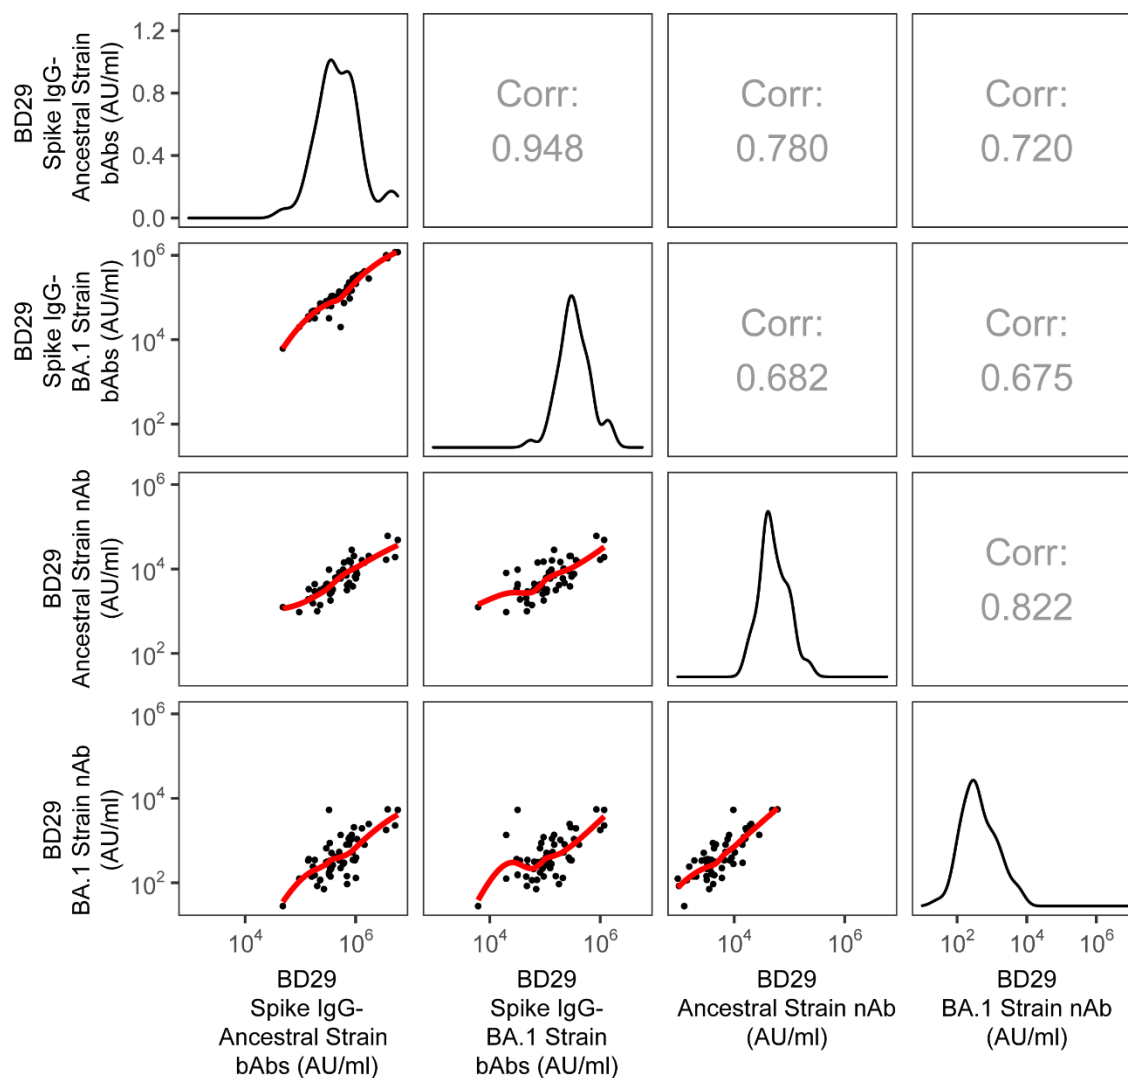

**Supplementary Fig. 11. Correlations of BD29 antibody markers among non-naive participants in the per-protocol boosted cohort (n = 55).** Corr = Inverse probability weight adjusted Spearman's rank correlation coefficient.  $P < 0.001$  for all pairwise correlations.

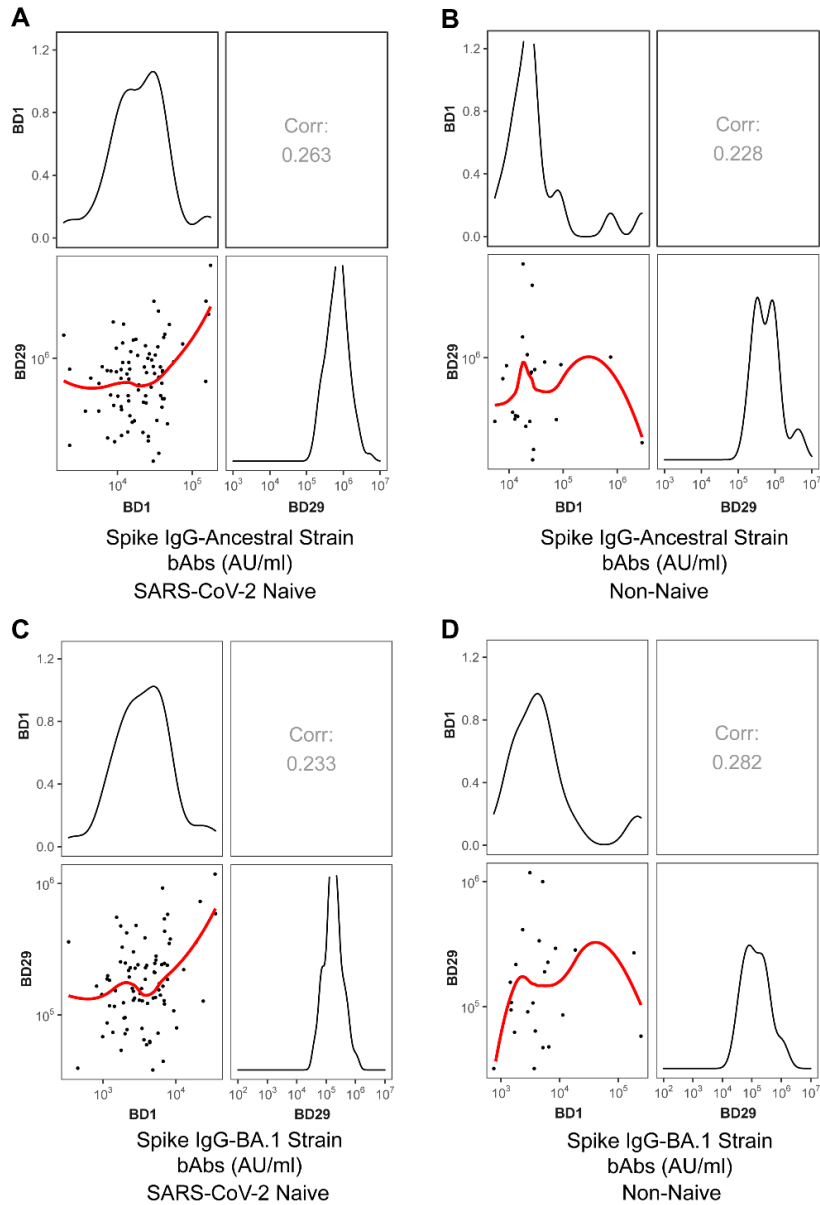

**Supplementary Fig. 12. Correlations between BD1 and BD29 (A, B) Spike IgG-Ancestral strain binding antibody (bAb) and (C, D) Spike IgG-BA.1 strain bAb concentrations among (A, C) SARS-CoV-2 naive participants and (B, D) non-naive participants in the per-protocol boosted cohort (A, C: n=84; B, D: n=23). Corr = Inverse probability weight adjusted Spearman's rank correlation coefficient.  $P < 0.001$  for the Ancestral strain among naive participants;  $P = 0.85$  for the Ancestral strain among non-naive participants;  $P = 0.002$  for the BA.1 strain among naive participants;  $P = 0.34$  for the BA.1 strain among non-naive participants.**

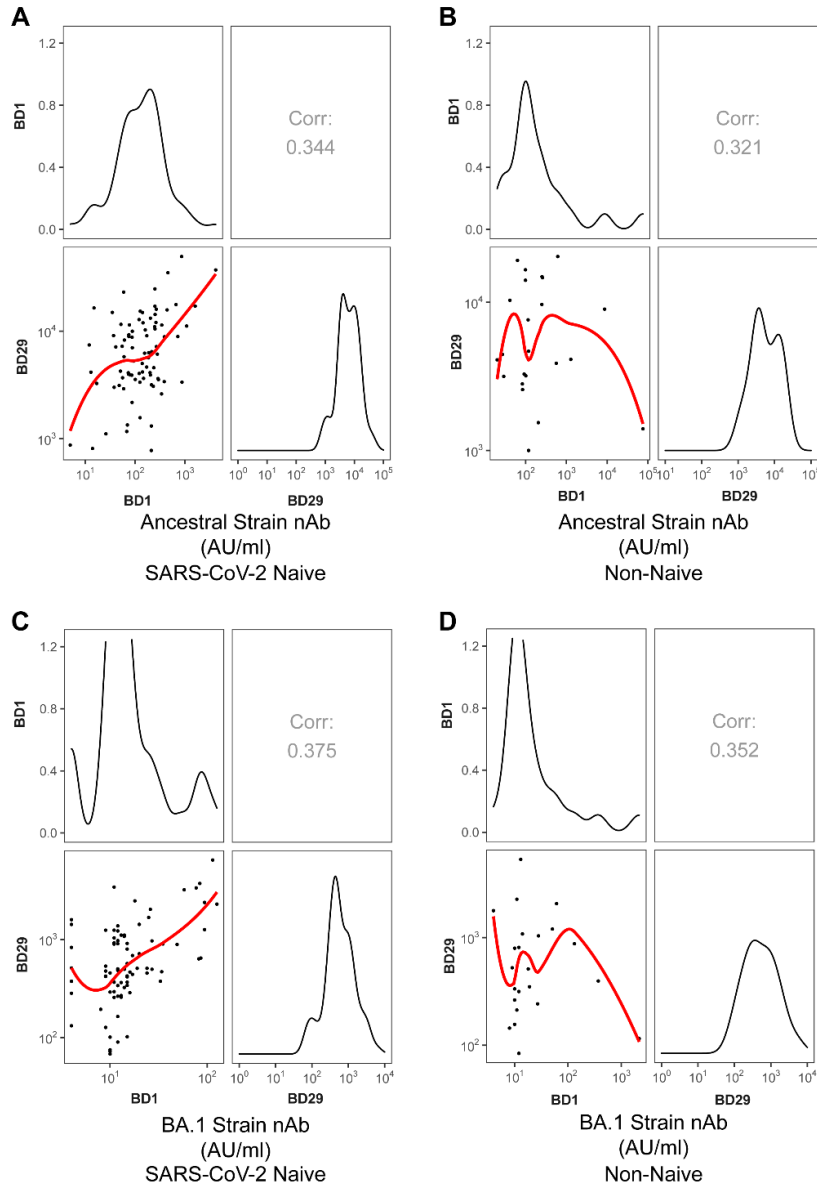

**Supplementary Fig. 13. Correlations between BD1 and BD29 (A, B) Ancestral strain neutralizing antibody (nAb) and (C, D) BA.1 strain nAb titers among (A, C) SARS-CoV-2 naive participants and (B, D) non-naive participants in the per-protocol boosted cohort (A, C: n=84; B, D: n =23). Corr = Inverse probability weight adjusted Spearman's rank correlation coefficient.  $P < 0.001$  for the Ancestral strain among naive participants;  $P = 0.61$  for the Ancestral strain among non-naive participants;  $P < 0.001$  for the BA.1 strain among naive participants;  $P = 0.80$  for the BA.1 strain among non-naive participants. For ancestral strain nAbs, the units AU/ml can be transformed to International Units (IU50)/ml (see SAP).**



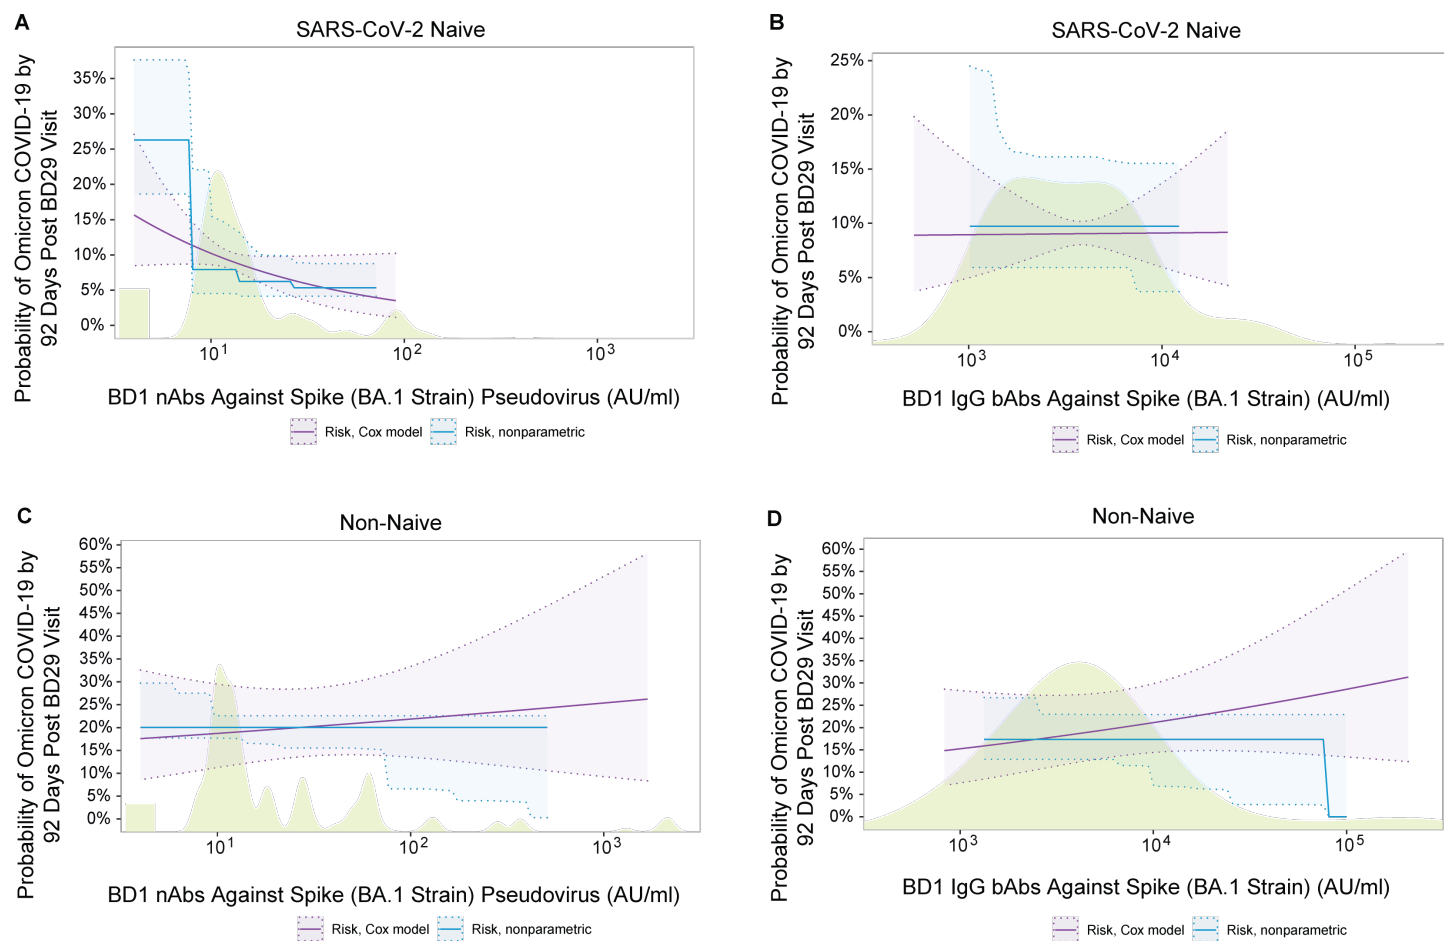

| Status               | Marker                    | No. Cases / No. At-Risk* | HR per 10-Fold Increase Pt. Est. (95% CI) | P-value (2-sided) | FDR-Adj. P-value** | FWER-Adj. P-value** |
|----------------------|---------------------------|--------------------------|-------------------------------------------|-------------------|--------------------|---------------------|
| BD1 SARS-CoV-2 Naive | BA.1 Strain nAb           | 1,277/14,047             | 0.31 (0.07, 1.37)                         | 0.123             | 0.736              | 0.479               |
| BD1 SARS-CoV-2 Naive | Spike IgG-BA.1 Strain bAb | 1,277/14,047             | 1.02 (0.29, 3.56)                         | 0.977             | 0.988              | 1.000               |
| BD1 Non-Naive        | BA.1 Strain nAb           | 35/204                   | 1.21 (0.56, 2.61)                         | 0.627             | 0.721              | 0.886               |
| BD1 Non-Naive        | Spike IgG-BA.1 Strain bAb | 35/204                   | 1.47 (0.71, 3.08)                         | 0.302             | 0.588              | 0.747               |

\* No. at-risk = estimated number in the population for analysis, i.e. per-protocol boosted participants (naive or non-naive, as designated) not experiencing the Omicron COVID-19 endpoint or SARS-CoV-2 infected through 6 days post BD29 visit; no. cases = number of this cohort with an observed Omicron COVID-19 endpoint.

\*\* FDR (false discovery rate)-adjusted p values and FWER (family-wise error rate)-adjusted p-values were computed over the set of p-values both for quantitative markers and categorical markers using the Westfall and Young permutation method (10000 replicates).

**Supplementary Fig. 14. Analyses of BD1 BA.1 strain neutralizing antibody (nAb) titer and Spike IgG-BA.1 strain binding antibody (bAb) concentration as a correlate of risk of Omicron COVID-19.** Curves show cumulative incidence of Omicron COVID-19, estimated using a Cox model (purple) or a nonparametric method (blue), in per-protocol boosted (A, B) SARS-CoV-2 naive participants (N = 14,047) and (C, D) non-naive participants (N = 204) by 92 days post BD29 by BD1 antibody marker level. The solid curves indicate the mean cumulative incidences. The dotted lines and shadings in between indicate bootstrap pointwise 95% CIs. The distribution of the marker in the respective analysis population, calculated by kernel density estimation, is plotted in light green. E) Hazard ratios of Omicron COVID-19 per 10-fold increase in each BD1 BA.1 strain marker in per-protocol boosted SARS-CoV-2 naive participants or non-naive participants. Baseline covariates adjusted for: baseline risk score, at risk status, and community of color status.

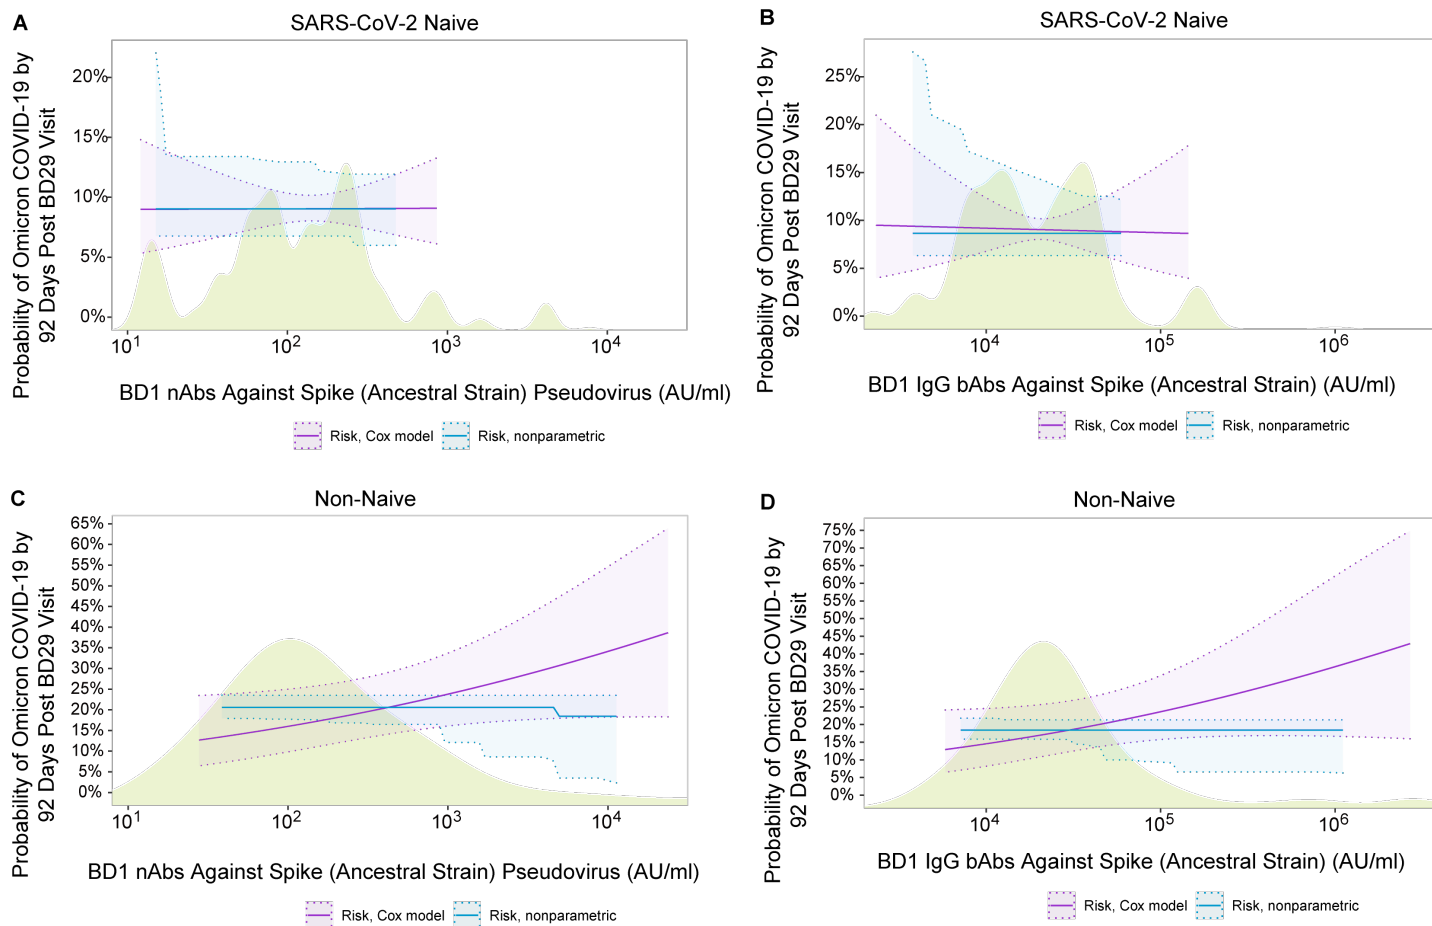

**E**

| Status               | Marker                         | No. Cases / No. At-Risk* | HR per 10-Fold Increase Pt. Est. (95% CI) | P-value (2-sided) | FDR-Adj. P-value** | FWER-Adj. P-value** |
|----------------------|--------------------------------|--------------------------|-------------------------------------------|-------------------|--------------------|---------------------|
| BD1 SARS-CoV-2 Naive | Ancestral Strain nAb           | 1,277/14,047             | 1.01 (0.47, 2.15)                         | 0.988             | 0.988              | 1.000               |
| BD1 SARS-CoV-2 Naive | Spike IgG-Ancestral Strain bAb | 1,277/14,047             | 0.95 (0.30, 2.98)                         | 0.924             | 0.988              | 1.000               |
| BD1 Non-Naive        | Ancestral Strain nAb           | 35/204                   | 1.61 (0.99, 2.63)                         | 0.057             | 0.408              | 0.398               |
| BD1 Non-Naive        | Spike IgG-Ancestral Strain bAb | 35/204                   | 1.78 (0.90, 3.51)                         | 0.096             | 0.433              | 0.486               |

\* No. at-risk = estimated number in the population for analysis, i.e. per-protocol boosted participants (naive or non-naive, as designated) not experiencing the Omicron COVID-19 endpoint or SARS-CoV-2 infected through 6 days post BD29 visit; no. cases = number of this cohort with an observed Omicron COVID-19 endpoint.

\*\* FDR (false discovery rate)-adjusted p values and FWER (family-wise error rate)-adjusted p-values were computed over the set of p-values both for quantitative markers and categorical markers using the Westfall and Young permutation method (10000 replicates).

**Supplementary Fig. 15. Analyses of BD1 Ancestral strain neutralizing antibody (nAb) titer and Spike IgG-Ancestral strain binding antibody (bAb) concentration as a correlate of risk of Omicron COVID-19.** Curves show cumulative incidence of Omicron COVID-19, estimated using a Cox model (purple) or a nonparametric method (blue), in per-protocol boosted (A, B) SARS-CoV-2 naive participants (N = 14,047) and (C, D) non-naive participants (N = 204) by 92 days post BD29 by BD1 antibody marker level. The solid curves indicate the mean cumulative incidences. The dotted lines and shadings in between indicate bootstrap pointwise 95% CIs. The distribution of the marker in the respective analysis population, calculated by kernel density estimation, is plotted in light green. E) Hazard ratios of Omicron COVID-19 per 10-fold increase in each BD1 Ancestral strain marker in per-protocol boosted SARS-CoV-2 naive participants or non-naive participants. Baseline covariates adjusted for: baseline risk score, at risk status, and community of color status. For ancestral strain nAbs, the units AU/ml can be transformed to International Units (IU50)/ml (see SAP).

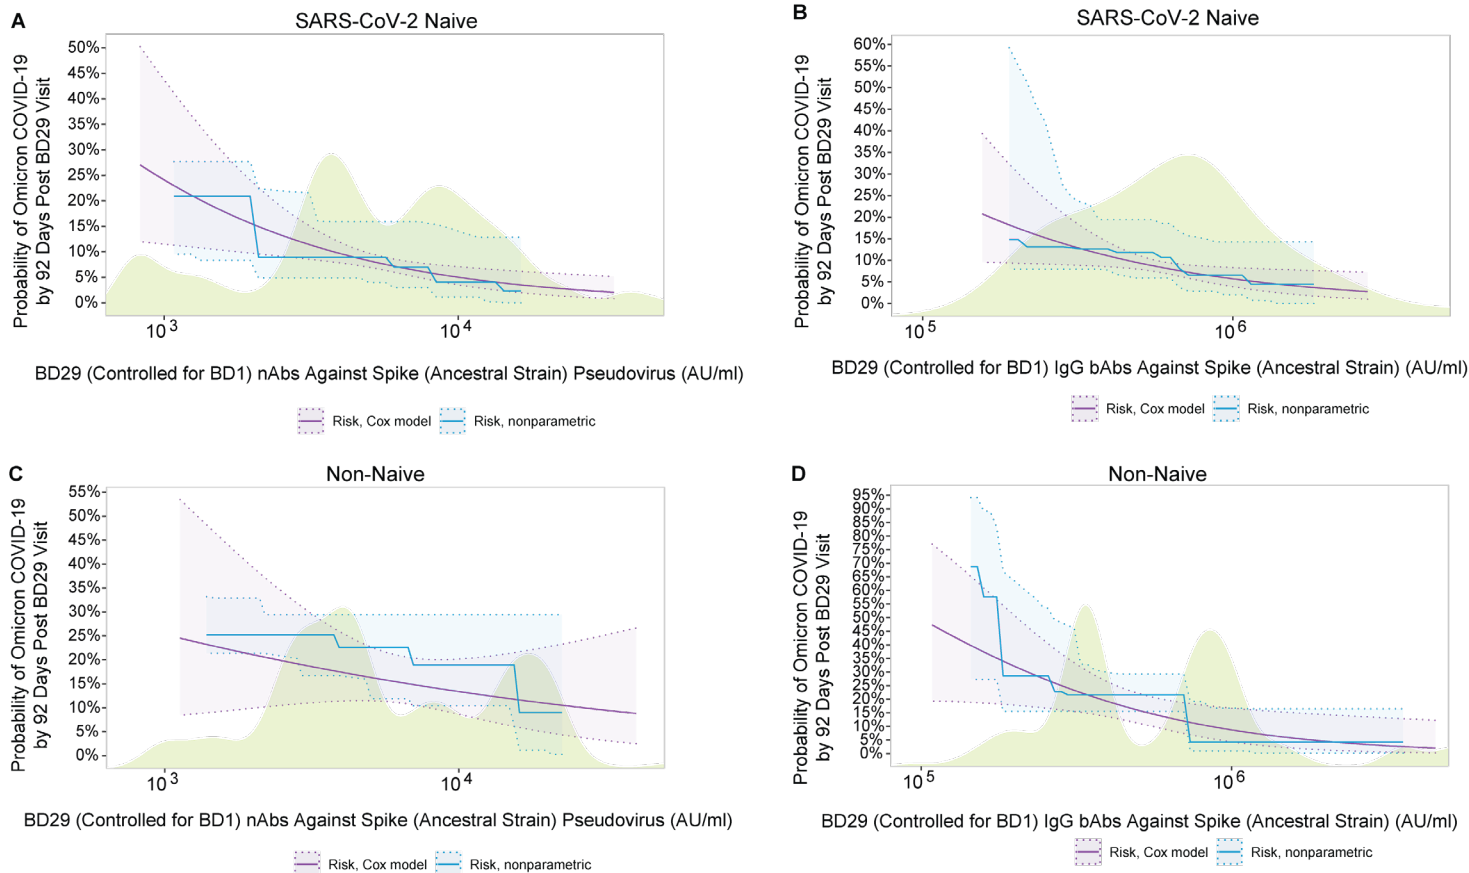

| Status                | Marker                         | No. Cases / No. At-Risk* | HR per 10-Fold Increase Pt. Est. (95% CI) | P-value (2-sided) | FDR-Adj. P-value** | FWER-Adj. P-value** |
|-----------------------|--------------------------------|--------------------------|-------------------------------------------|-------------------|--------------------|---------------------|
| BD29 SARS-CoV-2 Naive | Ancestral Strain nAb           | 1,277/14,047             | 0.33 (0.10, 1.13)                         | 0.076             | 0.122              | 0.195               |
| BD29 SARS-CoV-2 Naive | Spike IgG-Ancestral Strain bAb | 1,277/14,047             | 0.23 (0.04, 1.25)                         | 0.089             | 0.125              | 0.195               |
| BD29 Non-Naive        | Ancestral Strain nAb           | 35/204                   | 0.45 (0.07, 2.95)                         | 0.409             | 0.513              | 0.638               |
| BD29 Non-Naive        | Spike IgG-Ancestral Strain bAb | 35/204                   | 0.10 (0.01, 0.68)                         | 0.019             | 0.289              | 0.211               |

\* No. at-risk = estimated number in the population for analysis, i.e. per-protocol boosted participants (naive or non-naive, as designated) not experiencing the Omicron COVID-19 endpoint or SARS-CoV-2 infected through 6 days post BD29 visit; no. cases = number of this cohort with an observed Omicron COVID-19 endpoint.

\*\* FDR (false discovery rate)-adjusted p values and FWER (family-wise error rate)-adjusted p-values were computed over the set of p-values both for quantitative markers and categorical markers using the Westfall and Young permutation method (10000 replicates).

**Supplementary Fig. 16. Analyses of BD29 Ancestral strain neutralizing antibody (nAb) titer and Spike IgG-Ancestral strain binding antibody (bAb) concentration as a correlate of risk of Omicron COVID-19.** Curves show cumulative incidence of Omicron COVID-19, estimated using a Cox model (purple) or a nonparametric method (blue), in per-protocol boosted (A, B) SARS-CoV-2 naive participants (N = 14,047) and (C, D) non-naive participants (N = 204) by 92 days post BD29 by BD29 antibody marker level. BD29 marker levels were controlled for BD1 marker levels. The solid curves indicate the mean cumulative incidences. The dotted lines and shadings in between indicate bootstrap pointwise 95% CIs. The distribution of the marker in the respective analysis population, calculated by kernel density estimation, is plotted in light green. E) Hazard ratios of Omicron COVID-19 per 10-fold increase in each BD29 Ancestral marker in per-protocol boosted SARS-CoV-2 naive participants or non-naive participants. Baseline covariates adjusted for: baseline risk score, at risk status, and community of color status. For ancestral strain nAbs, the units AU/ml can be transformed to International Units (IU50)/ml (see SAP).

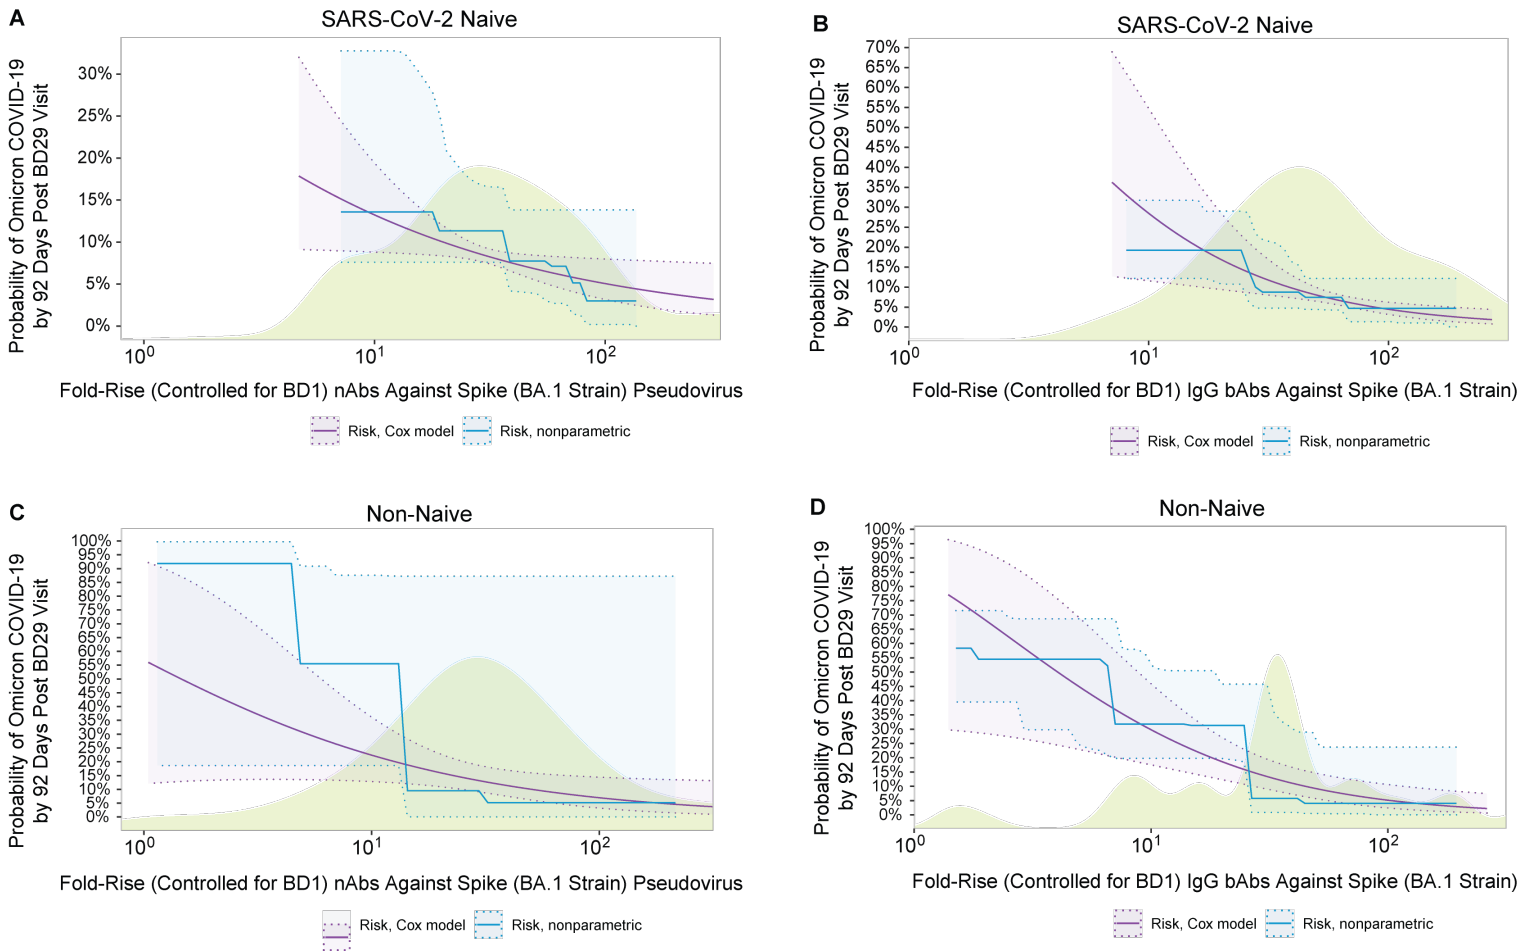

**Supplementary Fig. 17. Analyses of fold-rise (BD29/BD1) BA.1 strain neutralizing antibody (nAb) titer and Spike IgG-BA.1 strain binding antibody (bAb) concentration as a correlate of risk of Omicron COVID-19.** Curves show cumulative incidence of Omicron COVID-19, estimated using a Cox model (purple) or a nonparametric method (blue), in per-protocol boosted (A, B) SARS-CoV-2 naive participants (N = 14,047) and (C, D) non-naive participants (N = 204) by 92 days post BD29 by BD29/BD29 antibody marker level. BD29 marker levels were controlled for BD1 marker levels. The solid curves indicate the mean cumulative incidences. The dotted lines and shadings in between indicate bootstrap pointwise 95% CIs. The distribution of the marker in the respective analysis population, calculated by kernel density estimation, is plotted in light green. Baseline covariates adjusted for: baseline risk score, at risk status, and community of color status.

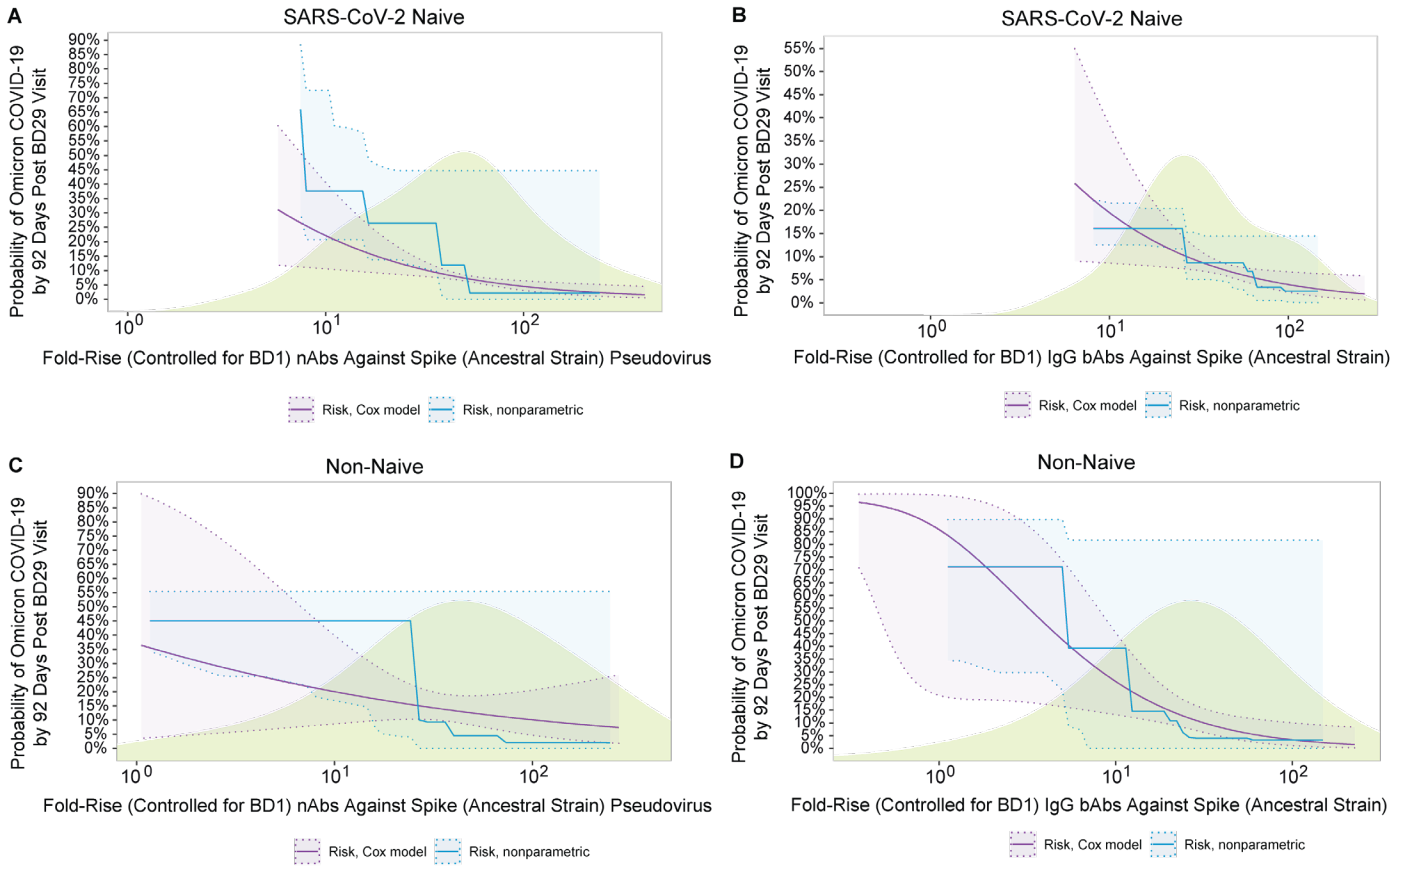

|           | Status           | Marker                         | No. Cases / No. At-Risk* | HR per 10-Fold Increase Pt. Est. (95% CI) | P-value (2-sided) | FDR-Adj. P-value** | FWER-Adj. P-value** |
|-----------|------------------|--------------------------------|--------------------------|-------------------------------------------|-------------------|--------------------|---------------------|
| Fold-Rise | SARS-CoV-2 Naive | Ancestral Strain nAb           | 1,277/14,047             | 0.38 (0.17, 0.83)                         | 0.015             | 0.064              | 0.084               |
| Fold-Rise | SARS-CoV-2 Naive | Spike IgG-Ancestral Strain bAb | 1,277/14,047             | 0.41 (0.16, 1.08)                         | 0.073             | 0.170              | 0.256               |
| Fold-Rise | Non-Naive        | Ancestral Strain nAb           | 35/204                   | 0.61 (0.39, 0.95)                         | 0.031             | 0.123              | 0.233               |
| Fold-Rise | Non-Naive        | Spike IgG-Ancestral Strain bAb | 35/204                   | 0.46 (0.25, 0.84)                         | 0.012             | 0.123              | 0.166               |

\* No. at-risk = estimated number in the population for analysis, i.e. per-protocol boosted participants (naive or non-naive, as designated) not experiencing the Omicron COVID-19 endpoint or SARS-CoV-2 infected through 6 days post BD29 visit; no. cases = number of this cohort with an observed Omicron COVID-19 endpoint.

\*\* FDR (false discovery rate)-adjusted p values and FWER (family-wise error rate)-adjusted p-values were computed over the set of p-values both for quantitative markers and categorical markers using the Westfall and Young permutation method (10000 replicates).

**Supplementary Fig. 18. Analyses of fold-rise (BD29/BD1) Ancestral strain neutralizing antibody (nAb) titer and Spike IgG-Ancestral strain binding antibody (bAb) concentration as a correlate of risk of Omicron COVID-19.** Curves show cumulative incidence of Omicron COVID-19, estimated using a Cox model (purple) or a nonparametric method (blue), in per-protocol boosted (A, B) SARS-CoV-2 naive participants (N = 14,047) and (C, D) non-naive participants (N = 204) by 92 days post BD29 by BD29/BD1 fold-rise. BD29 marker levels were controlled for BD1 marker levels. The solid curves indicate the mean cumulative incidences. The dotted lines and shadings in between indicate bootstrap pointwise 95% CIs. The distribution of the marker in the respective analysis population, calculated by kernel density estimation, is plotted in light green. E) Hazard ratios of Omicron COVID-19 per 10-fold increase in each fold-rise (BD29/BD1) Ancestral marker in per-protocol boosted SARS-CoV-2 naive participants or non-naive participants. Baseline covariates adjusted for: baseline risk score, at risk status, and community of color status.

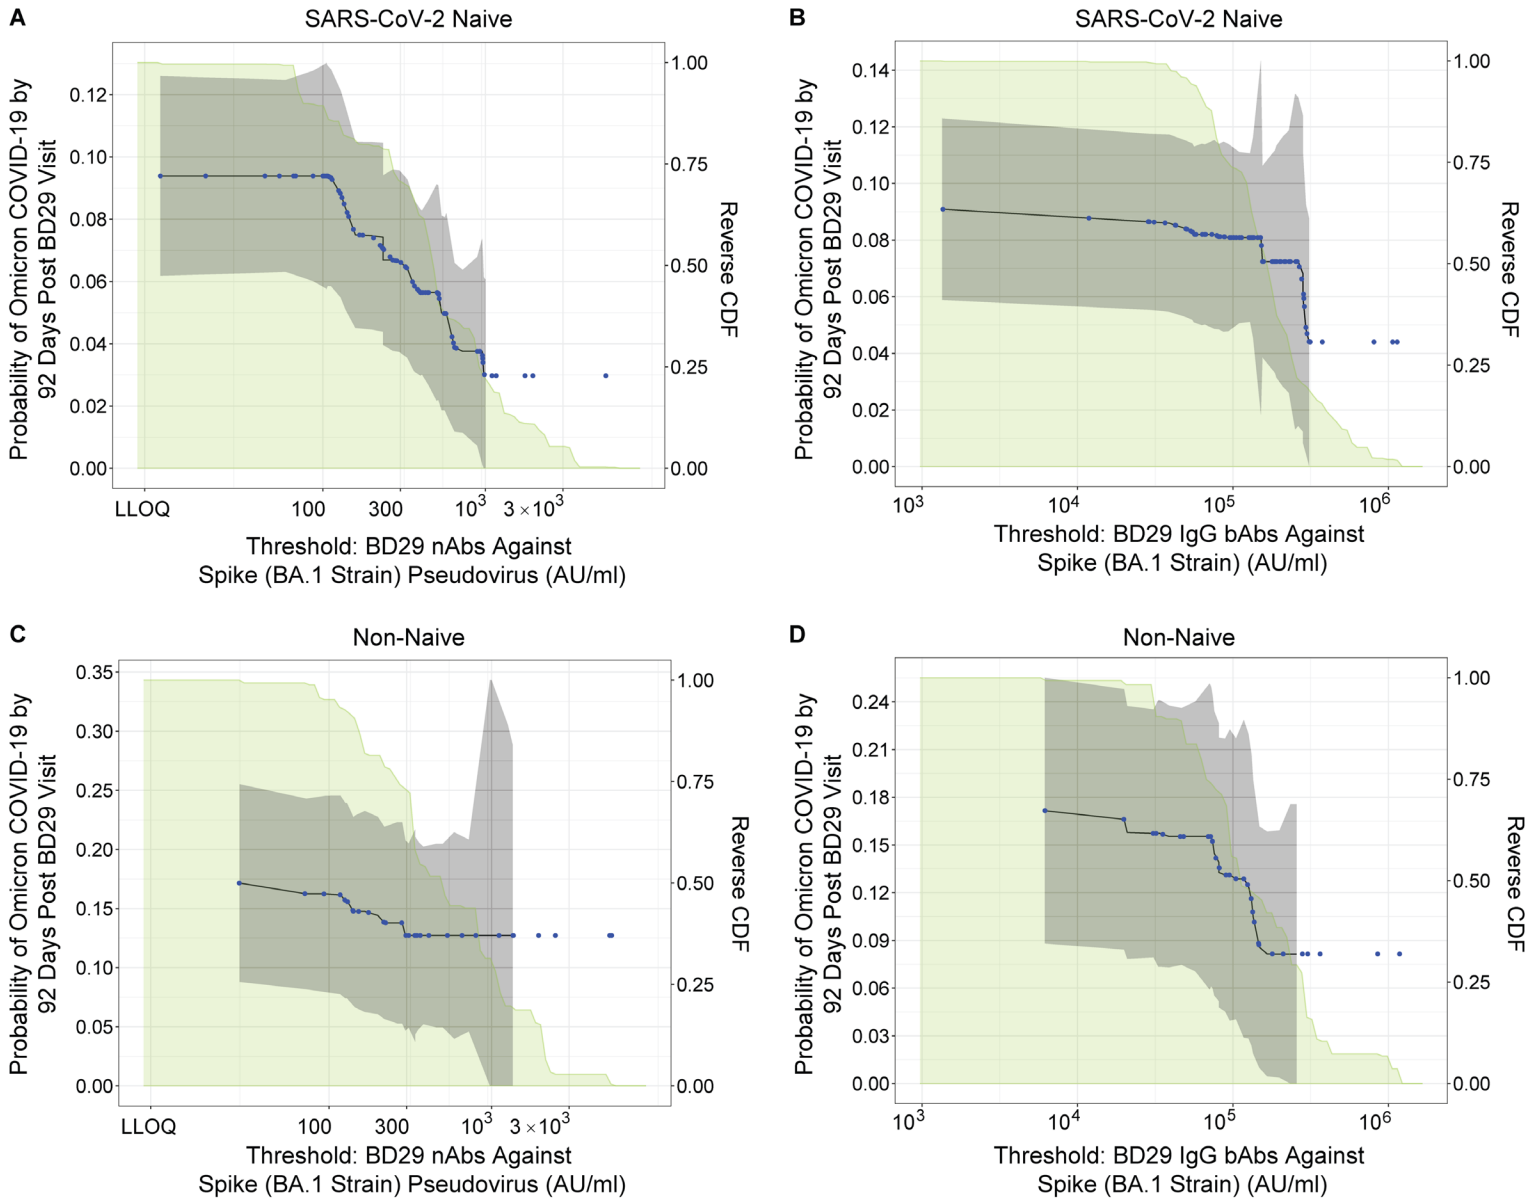

**Supplementary Fig. 19. Cumulative incidence of Omicron COVID-19 by 92 days post BD29 by per-protocol boosted subgroups of (A, B) SARS-CoV-2 naive participants (N = 14,047) and (C, D) non-naive participants (N = 204) defined by (A, C) BD29 BA.1 strain neutralizing antibody (nAb) titer or (B, D) BD29 Spike IgG-BA.1 strain binding antibody (bAb) concentration above a threshold.** The reverse cumulative distribution function (CDF) of each antibody marker is overlaid in green. Estimates and confidence intervals were adjusted using the assumption that the true threshold-response is nonincreasing. The blue dots correspond to marker values where an event is observed. The gray shaded area is pointwise 95% CIs.

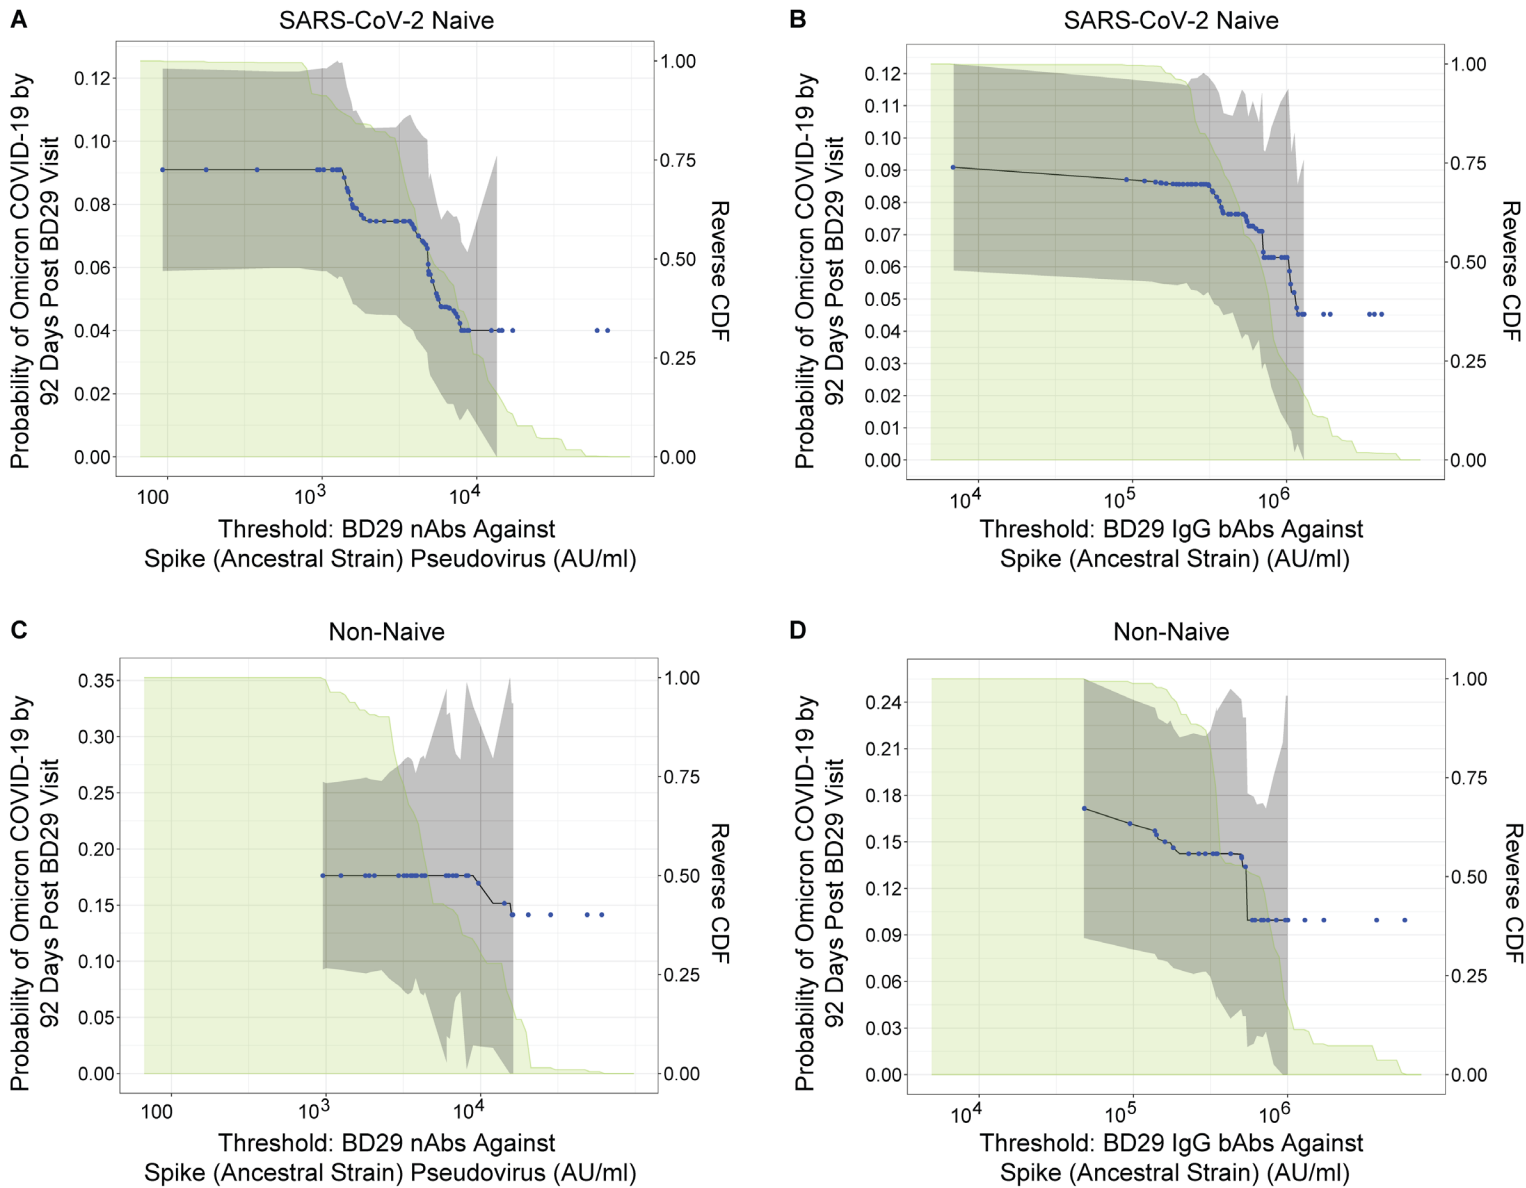

**Supplementary Fig. 20. Cumulative incidence of Omicron COVID-19 by 92 days post BD29 by per-protocol boosted subgroups of (A, B) SARS-CoV-2 naive participants (N = 14,047) and (C, D) non-naive participants (N = 204) defined by (A, C) BD29 Ancestral strain neutralizing antibody (nAb) titer or (B, D) BD29 Spike IgG-Ancestral strain binding antibody (bAb) concentration above a threshold.** The reverse cumulative distribution function (CDF) of each antibody marker is overlaid in green. Estimates and confidence intervals were adjusted using the assumption that the true threshold-response is nonincreasing. The blue dots correspond to marker values where an event is observed. The gray shaded area is pointwise 95% CIs. For ancestral strain nAbs, the units AU/ml can be transformed to International Units (IU50)/ml (see SAP).

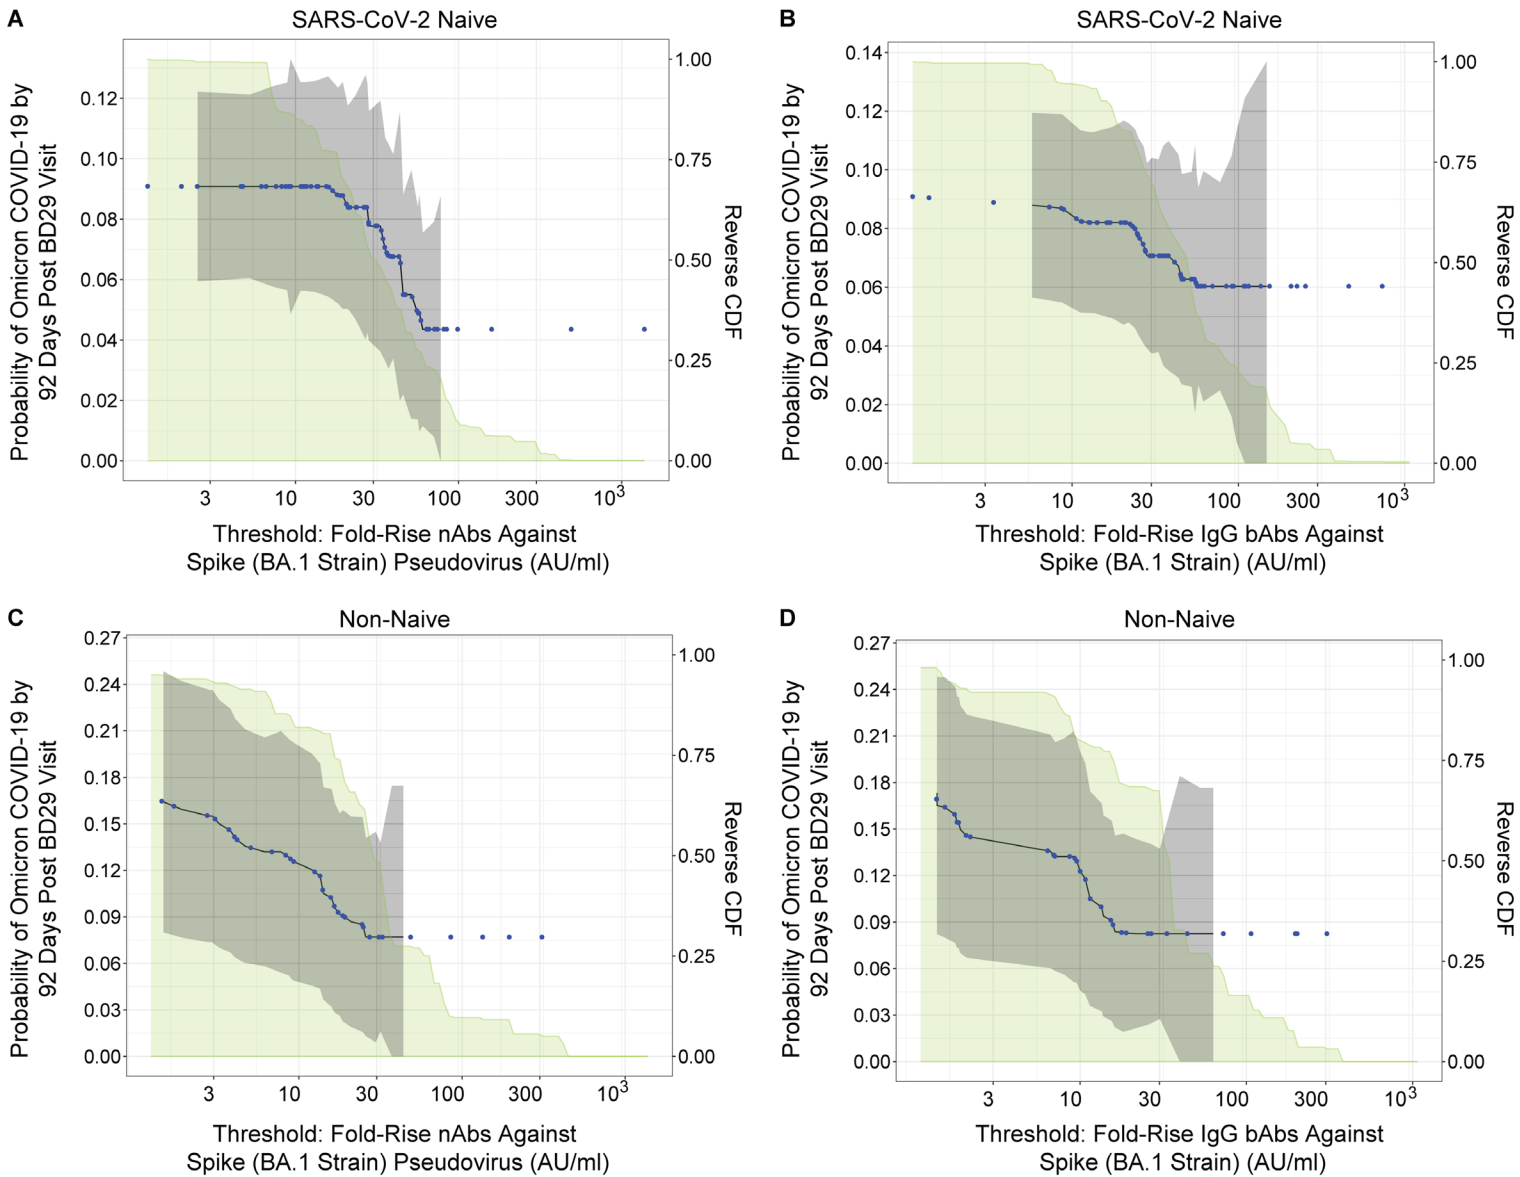

**Supplementary Fig. 21. Cumulative incidence of Omicron COVID-19 by 92 days post BD29 by per-protocol boosted subgroups of (A, B) SARS-CoV-2 naive participants (N = 14,047) and (C, D) non-naive participants (N = 204) defined by (A, C) Fold-rise (BD29/BD1) BA.1 strain neutralizing antibody (nAb) titer or (B, D) Fold-rise (BD29/BD1) Spike IgG-BA.1 strain binding antibody (bAb) concentration above a threshold. The reverse cumulative distribution function (CDF) of each antibody marker is overlaid in green. Estimates and confidence intervals were adjusted using the assumption that the true threshold-response is nonincreasing. The blue dots correspond to marker values where an event is observed. The gray shaded area is pointwise 95% CIs.**



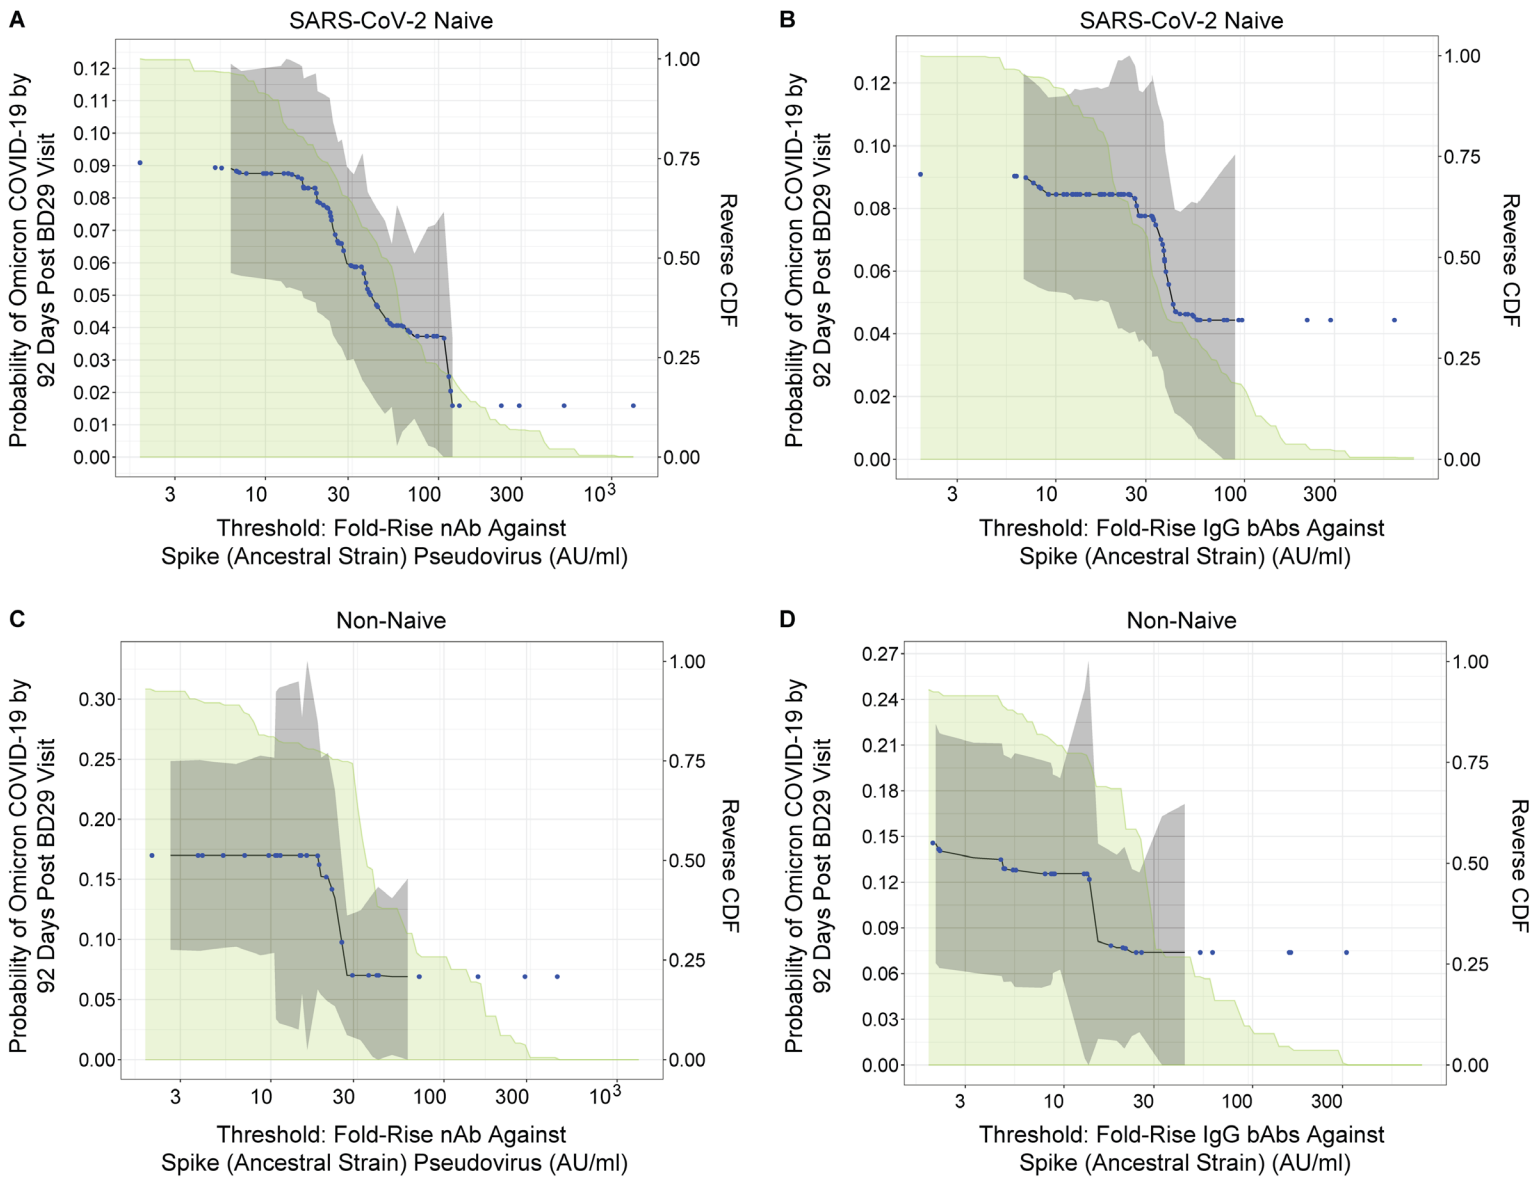

**Supplementary Fig. 22. Cumulative incidence of Omicron COVID-19 by 92 days post BD29 by per-protocol boosted subgroups of (A, B) SARS-CoV-2 naive participants (N = 14,047) and (C, D) non-naive participants (N = 204) defined by (A, C) Fold-rise (BD29/BD1) Ancestral strain neutralizing antibody (nAb) titer or (B, D) Fold-rise (BD29/BD1) Spike IgG-Ancestral strain binding antibody (bAb) concentration above a threshold.** The reverse cumulative distribution function (CDF) of each antibody marker is overlaid in green. Estimates and confidence intervals were adjusted using the assumption that the true threshold-response is nonincreasing. The blue dots correspond to marker values where an event is observed. The gray shaded area is pointwise 95% CIs. For ancestral strain nAbs, the units AU/ml can be transformed to International Units (IU50)/ml (see SAP).

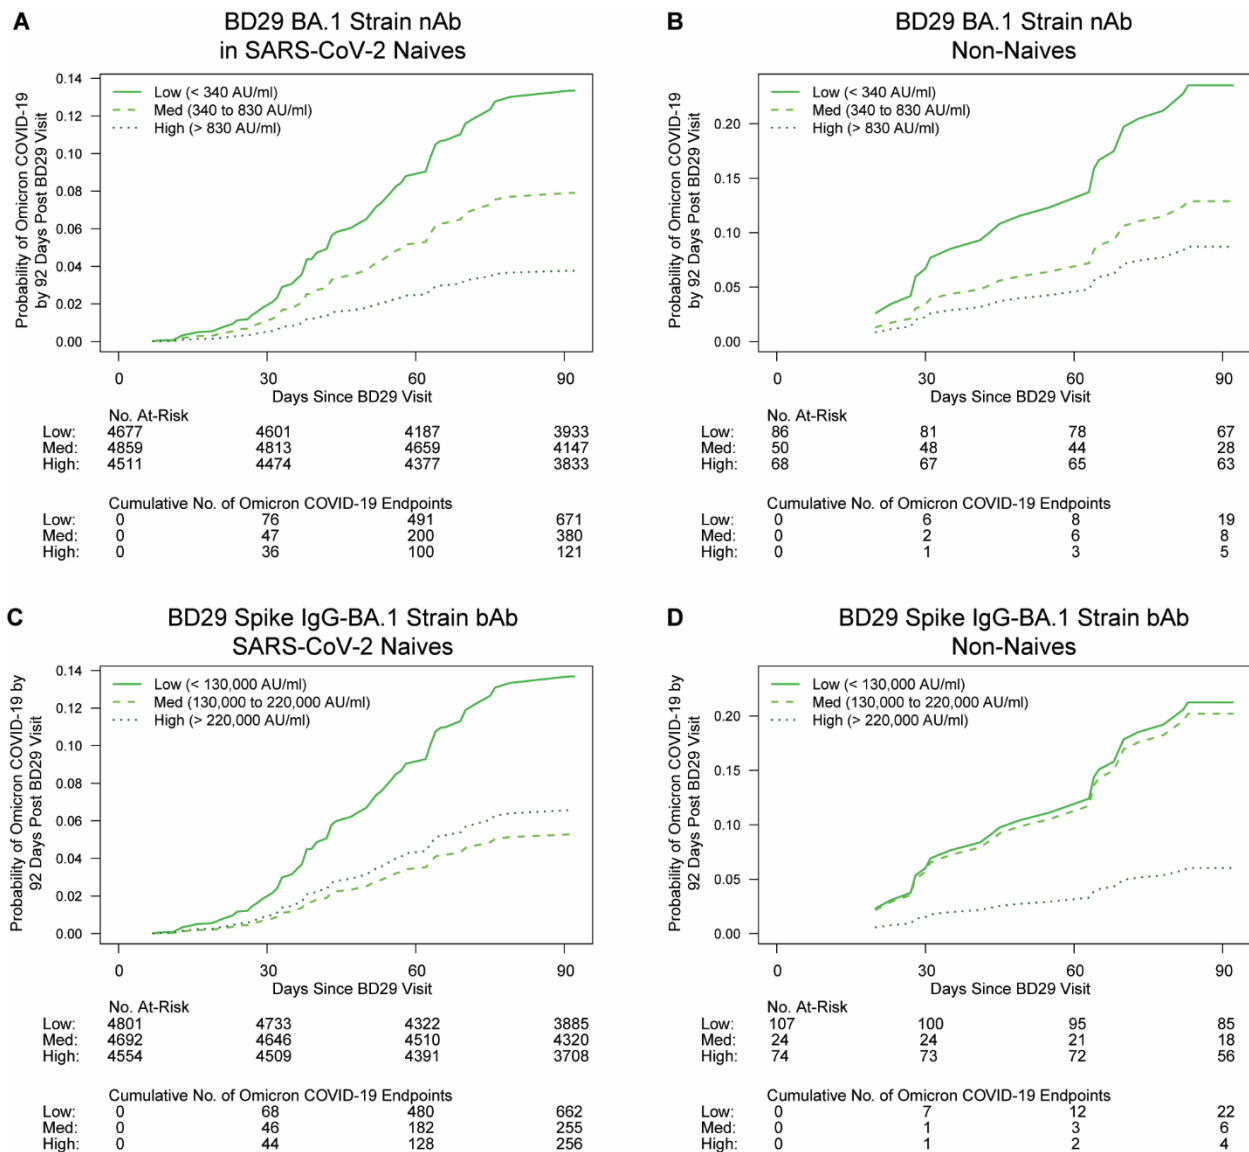

**Supplementary Fig. 23. Cox-model-based marginalized Omicron COVID-19 cumulative incidence curves for subgroups of per-protocol boosted (A, C) SARS-CoV-2 naive (N = 14,047) or (B, D) non-naive participants (N = 204) defined by BD29 BA.1 strain antibody tertile. A, B: BD29 BA.1 strain neutralizing antibody (nAb); C, D: BD29 Spike IgG-BA.1 strain binding antibody (bAb). No. at risk = estimated number in the population for analysis, i.e. per-protocol (A, C) SARS-CoV-2 naive or (B, D) non-naive boosted participants not experiencing the Omicron COVID-19 endpoint or SARS-CoV-2 infected through 6 days post BD29 visit. Analyses were adjusted for baseline risk score, at-risk status, and community of color status.**

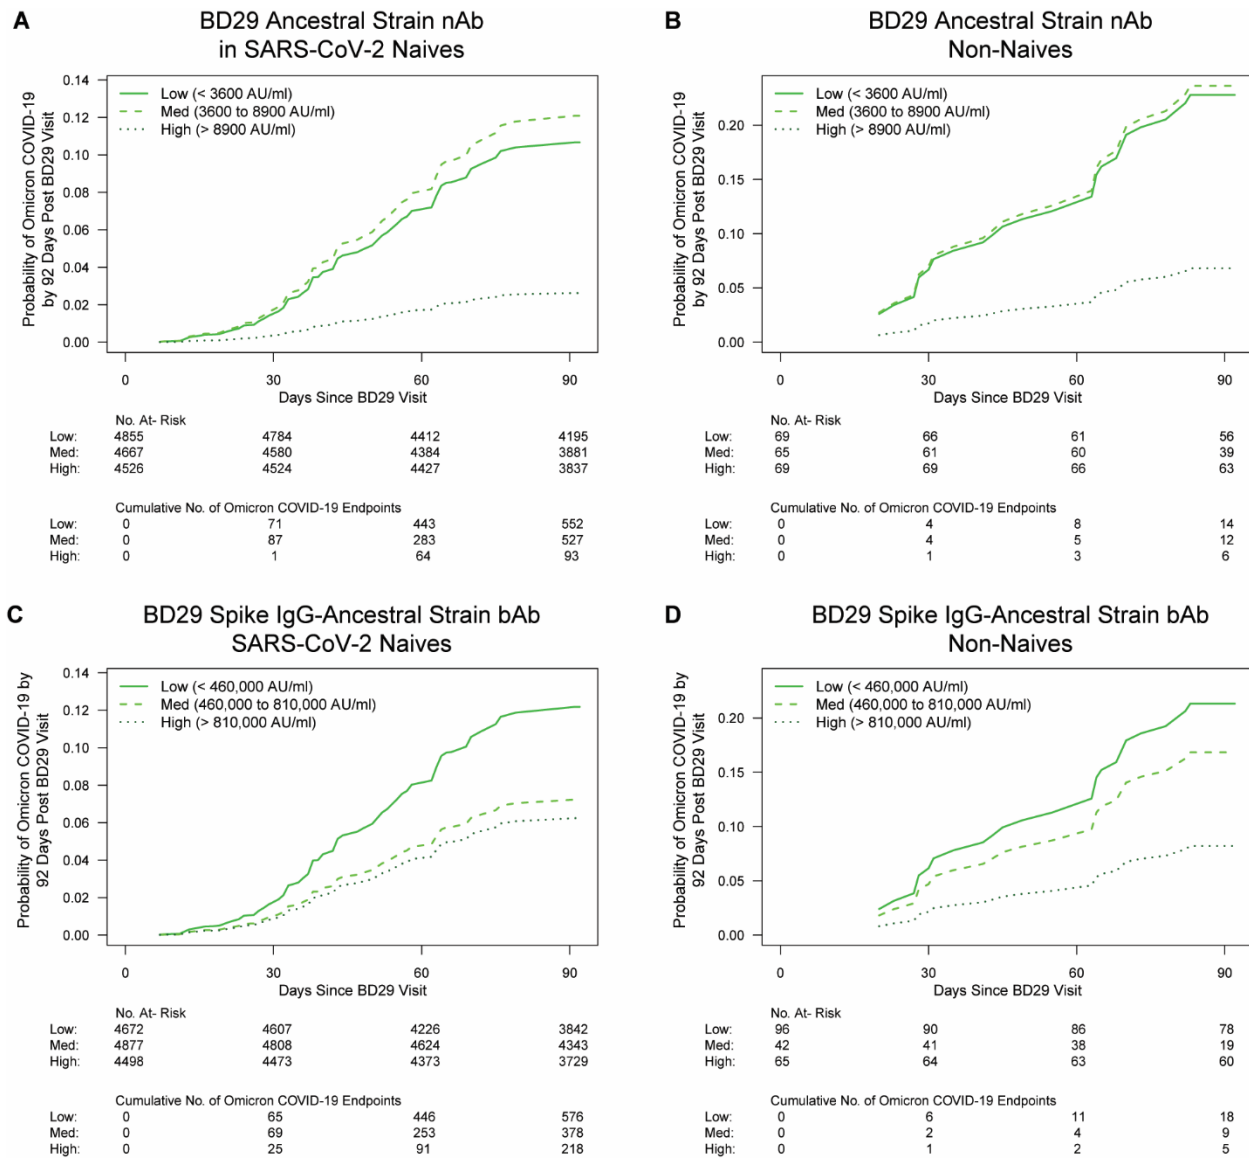

**Supplementary Fig. 24. Cox-model-based marginalized Omicron COVID-19 cumulative incidence curves for subgroups of per-protocol boosted (A, C) SARS-CoV-2 naive (N = 14,047) or (B, D) non-naive (N = 204) participants defined by BD29 Ancestral strain antibody tertile. A, B: BD29 Ancestral strain neutralizing antibody (nAb); C, D: BD29 Spike IgG-Ancestral strain binding antibody (bAb). No. at risk = estimated number in the population for analysis, i.e. per-protocol (A, C) SARS-CoV-2 naive or (B, D) non-naive boosted participants not experiencing the Omicron COVID-19 endpoint or SARS-CoV-2 infected through 6 days post BD29 visit. Analyses were adjusted for baseline risk score, at-risk status, and community of color status. For ancestral strain nAbs, the units AU/ml can be transformed to International Units (IU50)/ml (see SAP).**

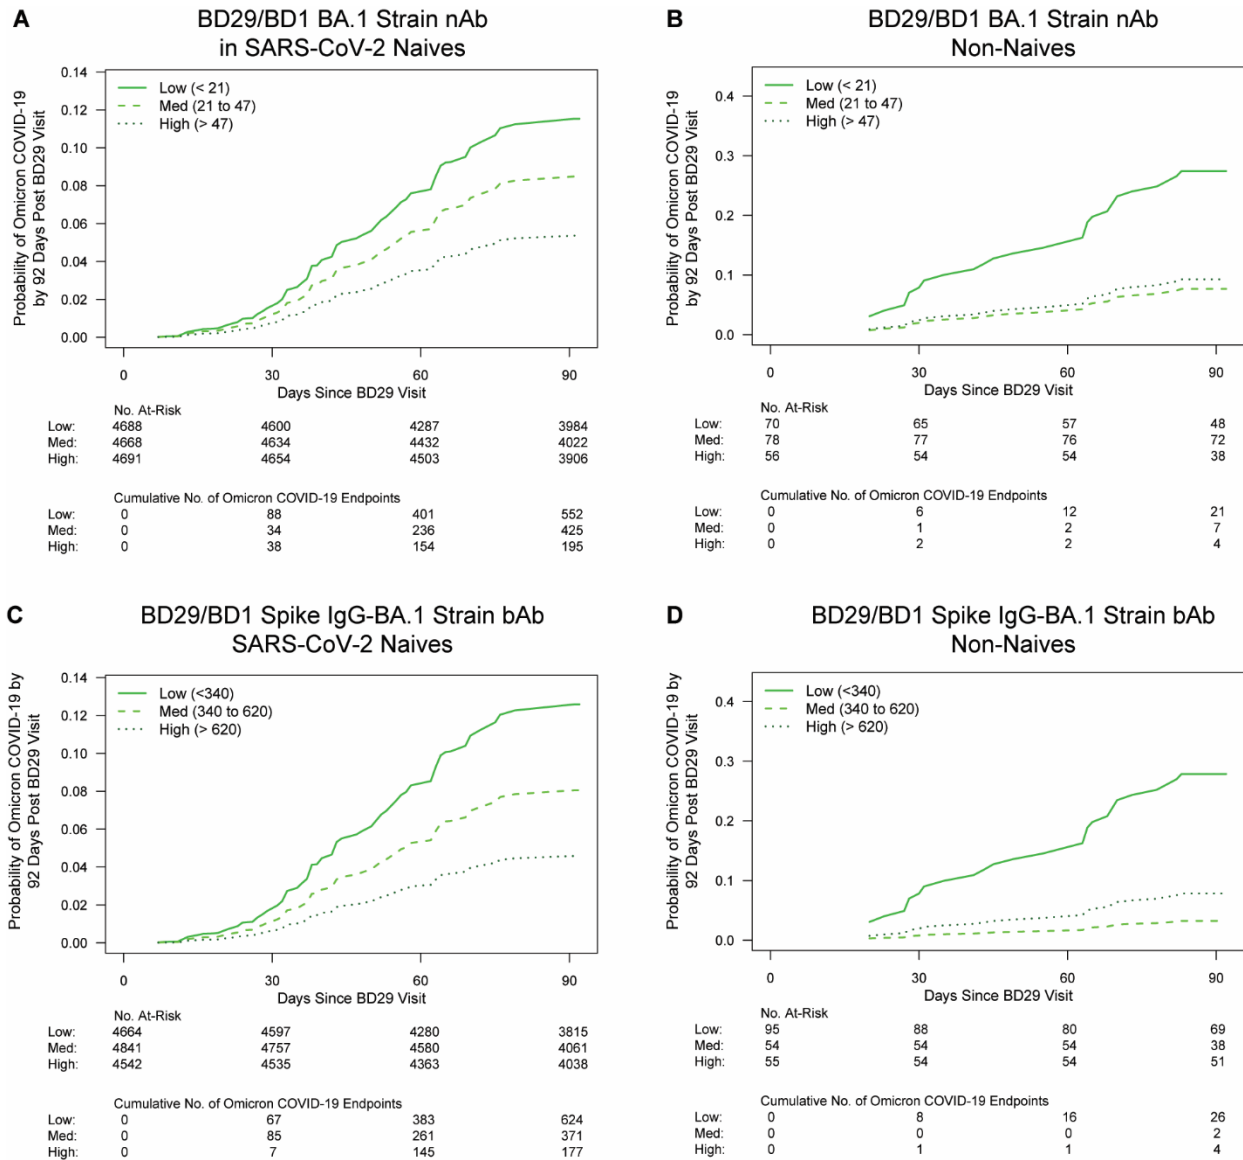

**Supplementary Fig. 25. Cox-model-based marginalized Omicron COVID-19 cumulative incidence curves for subgroups of per-protocol boosted (A, C) SARS-CoV-2 naive (N = 14,047) or (B, D) non-naive (N = 204) participants defined by fold-rise (BD29/BD1) BA.1 strain antibody tertile. A, B: Fold-rise BA.1 strain neutralizing antibody (nAb); C, D: Fold-rise Spike IgG-BA.1 strain binding antibody (bAb). No. at risk = estimated number in the population for analysis, i.e. per-protocol (A, C) SARS-CoV-2 naive or (B, D) non-naive boosted participants not experiencing the Omicron COVID-19 endpoint or SARS-CoV-2 infected through 6 days post BD29 visit. Analyses were adjusted for baseline risk score, at-risk status, and community of color status.**

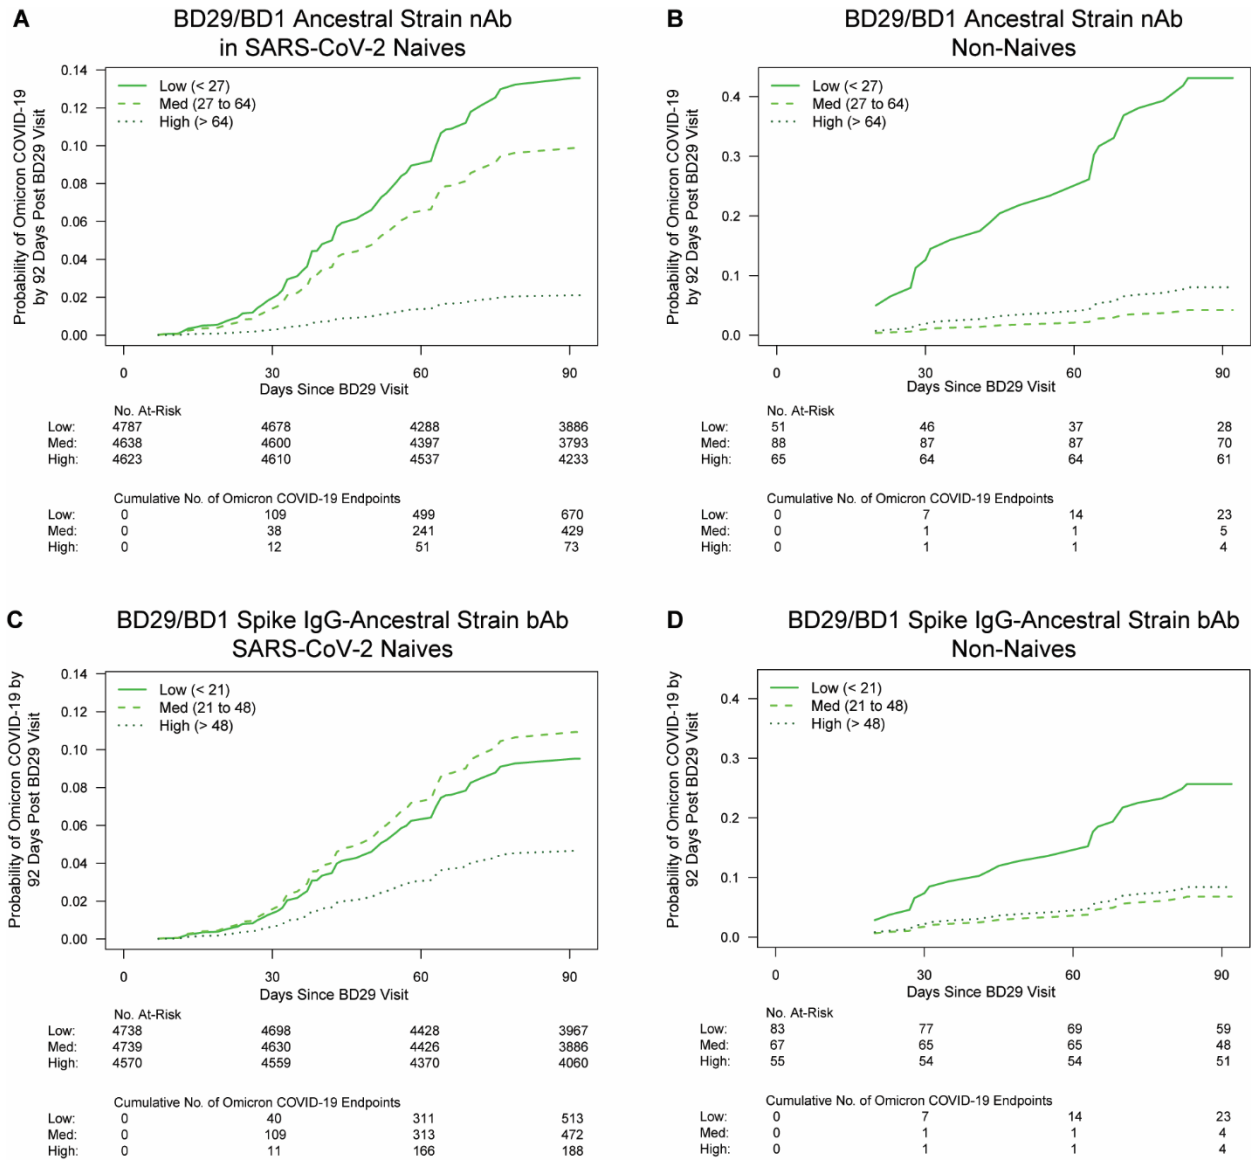

**Supplementary Fig. 26. Cox-model-based marginalized Omicron COVID-19 cumulative incidence curves for subgroups of per-protocol boosted (A, C) SARS-CoV-2 naive (N = 14,047) or (B, D) non-naive (N = 204) participants defined by fold-rise (BD29/BD1) Ancestral strain antibody tertile. A, B: Fold-rise Ancestral strain neutralizing antibody (nAb); C, D: Fold-rise Spike IgG-Ancestral strain binding antibody (bAb). No. at risk = estimated number in the population for analysis, i.e. per-protocol (A, C) SARS-CoV-2 naive or (B, D) non-naive boosted participants not experiencing the Omicron COVID-19 endpoint or SARS-CoV-2 infected through 6 days post BD29 visit. Analyses were adjusted for baseline risk score, at-risk status, and community of color status.**

**Supplementary Table 7. Estimated hazard ratios of Omicron COVID-19 for the medium versus low and for the high versus low tertiles of the designated BD1 BA.1 strain and Ancestral strain markers, in SARS-CoV-2 naive and non-naive participants.** Comparisons were made in per-protocol boosted participants. N/A, not applicable.

| BD1 Marker                             | Tertile* | No. cases/<br>No. at-<br>risk** | Attack<br>rate | Hazard<br>Ratio<br>Pt. Est. | Hazard<br>Ratio 95%<br>CI | P value<br>(2-sided) | Overall<br>P<br>value <sup>¶</sup> | FDR-<br>adjusted<br>P value <sup>†</sup> | FWER-<br>adjusted<br>P value <sup>‡</sup> |
|----------------------------------------|----------|---------------------------------|----------------|-----------------------------|---------------------------|----------------------|------------------------------------|------------------------------------------|-------------------------------------------|
| <b>A) SARS-CoV-2 Naive</b>             |          |                                 |                |                             |                           |                      |                                    |                                          |                                           |
| Spike IgG-BA.1<br>strain bAbs          | Low      | 342/4,734                       | 0.0722         | 1                           | N/A                       | N/A                  | 0.760                              | 0.988                                    | 0.998                                     |
|                                        | Med      | 515/4,681                       | 0.1100         | 1.44                        | (0.46, 4.47)              | 0.529                |                                    |                                          |                                           |
|                                        | High     | 419/4,632                       | 0.0905         | 1.11                        | (0.39, 3.18)              | 0.850                |                                    |                                          |                                           |
| BA.1 Strain<br>nAbs                    | Low      | 667/6,196                       | 0.1077         | 1                           | N/A                       | N/A                  | 0.584                              | 0.967                                    | 0.979                                     |
|                                        | Med      | 361/4,267                       | 0.0846         | 0.72                        | (0.30, 1.77)              | 0.479                |                                    |                                          |                                           |
|                                        | High     | 249/3,584                       | 0.0695         | 0.60                        | (0.21, 1.68)              | 0.328                |                                    |                                          |                                           |
| Spike IgG-<br>Ancestral Strain<br>bAbs | Low      | 359/4,819                       | 0.0745         | 1                           | N/A                       | N/A                  | 0.775                              | 0.988                                    | 0.998                                     |
|                                        | Med      | 497/4,690                       | 0.1060         | 1.42                        | (0.50, 3.99)              | 0.507                |                                    |                                          |                                           |
|                                        | High     | 420/4,538                       | 0.0926         | 1.14                        | (0.43, 3.04)              | 0.791                |                                    |                                          |                                           |
| Ancestral Strain<br>nAbs               | Low      | 395/4,740                       | 0.0833         | 1                           | N/A                       | N/A                  | 0.954                              | 0.988                                    | 1.000                                     |
|                                        | Med      | 413/4,681                       | 0.0882         | 0.97                        | (0.38, 2.52)              | 0.953                |                                    |                                          |                                           |
|                                        | High     | 469/4,626                       | 0.1014         | 1.10                        | (0.40, 3.02)              | 0.848                |                                    |                                          |                                           |
| <b>B) Non-Naive</b>                    |          |                                 |                |                             |                           |                      |                                    |                                          |                                           |
| Spike IgG-BA.1<br>Strain bAbs          | Low      | 4/39                            | 0.1026         | 1                           | N/A                       | N/A                  | 0.720                              | 0.755                                    | 0.886                                     |
|                                        | Med      | 12/77                           | 0.1558         | 1.57                        | (0.27, 9.01)              | 0.614                |                                    |                                          |                                           |
|                                        | High     | 19/89                           | 0.2135         | 1.95                        | (0.37, 10.24)             | 0.428                |                                    |                                          |                                           |
| BA.1 Strain<br>nAbs                    | Low      | 12/76                           | 0.1579         | 1                           | N/A                       | N/A                  | 0.462                              | 0.662                                    | 0.847                                     |
|                                        | Med      | 3/48                            | 0.0625         | 0.48                        | (0.05, 4.35)              | 0.515                |                                    |                                          |                                           |
|                                        | High     | 20/80                           | 0.2500         | 1.70                        | (0.51, 5.72)              | 0.390                |                                    |                                          |                                           |
| Spike IgG-<br>Ancestral Strain<br>bAbs | Low      | 3/27                            | 0.1111         | 1                           | N/A                       | N/A                  | 0.059                              | 0.408                                    | 0.399                                     |
|                                        | Med      | 10/115                          | 0.0870         | 0.55                        | (0.09, 3.23)              | 0.507                |                                    |                                          |                                           |
|                                        | High     | 22/62                           | 0.3548         | 2.78                        | (0.46, 16.71)             | 0.263                |                                    |                                          |                                           |
| Ancestral Strain<br>nAbs               | Low      | 4/41                            | 0.0976         | 1                           | N/A                       | N/A                  | 0.198                              | 0.499                                    | 0.664                                     |
|                                        | Med      | 9/87                            | 0.1034         | 0.63                        | (0.11, 3.71)              | 0.613                |                                    |                                          |                                           |
|                                        | High     | 22/76                           | 0.2895         | 2.34                        | (0.46, 1.73)              | 0.303                |                                    |                                          |                                           |

Baseline covariates were adjusted for baseline risk score, at risk status, and community of color status, all defined identically as in ref.<sup>8</sup>

\*Antibody values defining the three tertiles were:

Spike IgG-BA.1 strain bAb: Low < 2000 AU/ml; Med 2000 to 5000 AU/ml; High > 5000 AU/ml.

BA.1 strain nAb: Low < 11 AU/ml; Med 11 to 15 AU/ml; High > 15 AU/ml.

Spike IgG-Ancestral strain bAb: Low < 12,000 AU/ml; Med 12,000 to 29,000 AU/ml; High > 29,000 AU/ml.

Ancestral strain nAb: Low < 73 AU/ml; Med 73 to 200 AU/ml; High > 200 AU/ml.

\*\*No. at risk = estimated number in the population for analysis, i.e. per-protocol (A) SARS-CoV-2 naive and (B) non-naive boosted participants not experiencing the Omicron COVID-19 endpoint or SARS-CoV-2 infected through 6 days post BD29 visit; no. cases = number of this cohort with an observed Omicron COVID-19 endpoint.

<sup>¶</sup>The overall  $P$  value is from a generalized Wald test of whether the hazard rate of Omicron COVID-19 differed across the Low, Medium and High subgroups.

<sup>†</sup> $q$ -value (false discovery rate, FDR) and family-wise error rate (FWER) were computed over the set of  $P$  values both for quantitative markers and categorical markers using the Westfall and Young permutation method (10,000 replicates).

**Supplementary Table 8. Estimated hazard ratios of Omicron COVID-19 for the medium versus low and for the high versus low tertiles of the designated BD29 BA.1 strain and Ancestral strain markers, in SARS-CoV-2 naive and non-naive participants.** Comparisons were made in per-protocol boosted participants. N/A, not applicable.

| BD29 Marker                     | Tertile* | No. cases/<br>No. at-risk** | Attack rate | Hazard Ratio Pt. Est. | Hazard Ratio 95% CI | P value (2-sided) | Overall P value <sup>†</sup> | FDR-adjusted P value <sup>†</sup> | FWER-adjusted P value <sup>†</sup> |
|---------------------------------|----------|-----------------------------|-------------|-----------------------|---------------------|-------------------|------------------------------|-----------------------------------|------------------------------------|
| <b>A) SARS-CoV-2 Naive</b>      |          |                             |             |                       |                     |                   |                              |                                   |                                    |
| Spike IgG-BA.1 Strain bAbs      | Low      | 693/4,801                   | 0.1443      | 1                     | N/A                 | N/A               | 0.129                        | 0.160                             | 0.195                              |
|                                 | Med      | 255/4,692                   | 0.0543      | 0.37                  | (0.13, 1.02)        | 0.056             |                              |                                   |                                    |
|                                 | High     | 330/4,554                   | 0.0725      | 0.46                  | (0.17, 1.26)        | 0.131             |                              |                                   |                                    |
| BA.1 Strain nAbs                | Low      | 699/4,677                   | 0.1495      | 1                     | N/A                 | N/A               | 0.053                        | 0.114                             | 0.181                              |
|                                 | Med      | 411/4,859                   | 0.0846      | 0.57                  | (0.24, 1.38)        | 0.217             |                              |                                   |                                    |
|                                 | High     | 167/4,511                   | 0.0370      | 0.27                  | (0.09, 0.78)        | 0.016             |                              |                                   |                                    |
| Spike IgG-Ancestral Strain bAbs | Low      | 607/4,672                   | 0.1299      | 1                     | N/A                 | N/A               | 0.403                        | 0.420                             | 0.418                              |
|                                 | Med      | 378/4,877                   | 0.0775      | 0.58                  | (0.21, 1.57)        | 0.282             |                              |                                   |                                    |
|                                 | High     | 292/4,498                   | 0.0649      | 0.49                  | (0.17, 1.46)        | 0.203             |                              |                                   |                                    |
| Ancestral Strain nAbs           | Low      | 552/4,855                   | 0.1137      | 1                     | N/A                 | N/A               | 0.018                        | 0.114                             | 0.101                              |
|                                 | Med      | 601/4,667                   | 0.1288      | 1.14                  | (0.47, 2.78)        | 0.769             |                              |                                   |                                    |
|                                 | High     | 123/4,526                   | 0.0272      | 0.24                  | (0.07, 0.77)        | 0.017             |                              |                                   |                                    |
| <b>B) Non-Naive</b>             |          |                             |             |                       |                     |                   |                              |                                   |                                    |
| Spike IgG-BA.1 Strain bAbs      | Low      | 23/107                      | 0.2150      | 1                     | N/A                 | N/A               | 0.145                        | 0.380                             | 0.539                              |
|                                 | Med      | 7/24                        | 0.2917      | 0.94                  | (0.28, 3.13)        | 0.920             |                              |                                   |                                    |
|                                 | High     | 5/74                        | 0.0676      | 0.24                  | (0.06, 1.01)        | 0.051             |                              |                                   |                                    |
| BA.1 Strain nAbs                | Low      | 20/86                       | 0.2326      | 1                     | N/A                 | N/A               | 0.260                        | 0.434                             | 0.638                              |
|                                 | Med      | 8/50                        | 0.1600      | 0.49                  | (0.11, 2.23)        | 0.359             |                              |                                   |                                    |
|                                 | High     | 7/68                        | 0.1029      | 0.32                  | (0.07, 1.49)        | 0.146             |                              |                                   |                                    |
| Spike IgG-Ancestral Strain bAbs | Low      | 19/96                       | 0.1979      | 1                     | N/A                 | N/A               | 0.263                        | 0.434                             | 0.638                              |
|                                 | Med      | 9/42                        | 0.2143      | 0.75                  | (0.24, 2.39)        | 0.629             |                              |                                   |                                    |
|                                 | High     | 7/65                        | 0.1077      | 0.33                  | (0.09, 1.24)        | 0.102             |                              |                                   |                                    |
| Ancestral Strain nAbs           | Low      | 14/69                       | 0.2029      | 1                     | N/A                 | N/A               | 0.135                        | 0.380                             | 0.539                              |
|                                 | Med      | 13/65                       | 0.2000      | 1.05                  | (0.35, 3.15)        | 0.933             |                              |                                   |                                    |
|                                 | High     | 8/69                        | 0.1159      | 0.25                  | (0.05, 1.29)        | 0.098             |                              |                                   |                                    |

Baseline covariates were adjusted for baseline risk score, at risk status, and community of color status, all defined identically as in ref.<sup>8</sup>

\*Antibody values defining the three tertiles are shown in Figures 2 and S22.

\*\*No. at risk = estimated number in the population for analysis, i.e. per-protocol (A) SARS-CoV-2 naive and (B) non-naive boosted participants not experiencing the Omicron COVID-19 endpoint or SARS-CoV-2 infected through 6 days post BD29 visit; no. cases = number of this cohort with an observed Omicron COVID-19 endpoint.

<sup>†</sup>The overall P value is from a generalized Wald test of whether the hazard rate of Omicron COVID-19 differed across the Low, Medium and High subgroups.

<sup>†</sup>q-value (false discovery rate, FDR) and family-wise error rate (FWER) were computed over the set of P values both for quantitative markers and categorical markers using the Westfall and Young permutation method (10,000 replicates).



**Supplementary Table 9. Estimated hazard ratios of Omicron COVID-19 for the medium versus low and for the high versus low tertiles of the designated fold-rise (BD29/BD1) BA.1 strain and Ancestral strain markers, in SARS-CoV-2 naive and non-naive participants.**

Comparisons were made in per-protocol boosted participants. N/A, not applicable.

| <b>BD29/BD1 Marker</b>          | <b>Tertile*</b> | <b>No. cases/<br/>No. at-risk**</b> | <b>Attack rate</b> | <b>Hazard Ratio Pt. Est.</b> | <b>Hazard Ratio 95% CI</b> | <b>P value (2-sided)</b> | <b>Overall P value<sup>‡</sup></b> | <b>FDR-adjusted P value<sup>†</sup></b> | <b>FWER-adjusted P value<sup>†</sup></b> |
|---------------------------------|-----------------|-------------------------------------|--------------------|------------------------------|----------------------------|--------------------------|------------------------------------|-----------------------------------------|------------------------------------------|
| <b>A) SARS-CoV-2 Naive</b>      |                 |                                     |                    |                              |                            |                          |                                    |                                         |                                          |
| Spike IgG-BA.1 Strain bAbs      | Low             | 653/4,664                           | 0.1400             | 1                            | N/A                        | N/A                      | 0.092                              | 0.181                                   | 0.280                                    |
|                                 | Med             | 417/4,841                           | 0.0861             | 0.62                         | (0.25, 1.55)               | 0.310                    |                                    |                                         |                                          |
|                                 | High            | 207/4,542                           | 0.0456             | 0.35                         | (0.13, 0.90)               | 0.030                    |                                    |                                         |                                          |
| BA.1 Strain nAbs                | Low             | 581/4,688                           | 0.1239             | 1                            | N/A                        | N/A                      | 0.294                              | 0.340                                   | 0.412                                    |
|                                 | Med             | 456/4,668                           | 0.0977             | 0.72                         | (0.26, 1.98)               | 0.529                    |                                    |                                         |                                          |
|                                 | High            | 240/4,691                           | 0.0512             | 0.45                         | (0.16, 1.23)               | 0.119                    |                                    |                                         |                                          |
| Spike IgG-Ancestral Strain bAbs | Low             | 513/4,738                           | 0.1083             | 1                            | N/A                        | N/A                      | 0.178                              | 0.251                                   | 0.412                                    |
|                                 | Med             | 562/4,739                           | 0.1186             | 1.16                         | (0.47, 2.84)               | 0.750                    |                                    |                                         |                                          |
|                                 | High            | 203/4,570                           | 0.0444             | 0.48                         | (0.18, 1.23)               | 0.125                    |                                    |                                         |                                          |
| Ancestral Strain nAbs           | Low             | 685/4,787                           | 0.1431             | 1                            | N/A                        | N/A                      | 0.002                              | 0.039                                   | 0.021                                    |
|                                 | Med             | 489/4,638                           | 0.1054             | 0.71                         | (0.32, 1.58)               | 0.406                    |                                    |                                         |                                          |
|                                 | High            | 103/4,623                           | 0.0223             | 0.15                         | (0.05, 0.42)               | <0.001                   |                                    |                                         |                                          |
| <b>B) Non-Naive</b>             |                 |                                     |                    |                              |                            |                          |                                    |                                         |                                          |
| Spike IgG-BA.1 Strain bAbs      | Low             | 28/95                               | 0.2947             | 1                            | N/A                        | N/A                      | 0.018                              | 0.123                                   | 0.194                                    |
|                                 | Med             | 2/54                                | 0.0370             | 0.09                         | (0.01, 1.25)               | 0.074                    |                                    |                                         |                                          |
|                                 | High            | 5/55                                | 0.0909             | 0.23                         | (0.07, 0.75)               | 0.015                    |                                    |                                         |                                          |
| BA.1 Strain nAbs                | Low             | 23/70                               | 0.3286             | 1                            | N/A                        | N/A                      | 0.037                              | 0.123                                   | 0.236                                    |
|                                 | Med             | 7/78                                | 0.0897             | 0.24                         | (0.07, 0.83)               | 0.025                    |                                    |                                         |                                          |
|                                 | High            | 5/56                                | 0.0893             | 0.29                         | (0.07, 1.22)               | 0.091                    |                                    |                                         |                                          |
| Spike IgG-Ancestral Strain bAbs | Low             | 26/83                               | 0.3133             | 1                            | N/A                        | N/A                      | 0.078                              | 0.151                                   | 0.261                                    |
|                                 | Med             | 4/67                                | 0.0597             | 0.23                         | (0.04, 1.21)               | 0.082                    |                                    |                                         |                                          |
|                                 | High            | 5/55                                | 0.0909             | 0.28                         | (0.07, 1.08)               | 0.064                    |                                    |                                         |                                          |
| Ancestral Strain nAbs           | Low             | 25/51                               | 0.4902             | 1                            | N/A                        | N/A                      | <0.001                             | 0.040                                   | 0.020                                    |
|                                 | Med             | 5/88                                | 0.0568             | 0.07                         | (0.02, 0.30)               | <0.001                   |                                    |                                         |                                          |
|                                 | High            | 5/65                                | 0.0769             | 0.14                         | (0.04, 0.45)               | <0.001                   |                                    |                                         |                                          |

Baseline covariates were adjusted for baseline risk score, at risk status, and community of color status, all defined identically as in ref.<sup>8</sup>

\*Antibody values defining the three tertiles are shown in Figures S23 and S24.

\*\*No. at risk = estimated number in the population for analysis, i.e. per-protocol (A) SARS-CoV-2 naive and (B) non-naive boosted participants not experiencing the Omicron COVID-19 endpoint or SARS-CoV-2 infected through 6 days post BD29 visit; no. cases = number of this cohort with an observed Omicron COVID-19 endpoint.

<sup>‡</sup>The overall P value is from a generalized Wald test of whether the hazard rate of Omicron COVID-19 differed across the Low, Medium and High subgroups.

<sup>†</sup>q-value (false discovery rate, FDR) and family-wise error rate (FWER) were computed over the set of P values both for quantitative markers and categorical markers using the Westfall and Young permutation method (10,000 replicates).

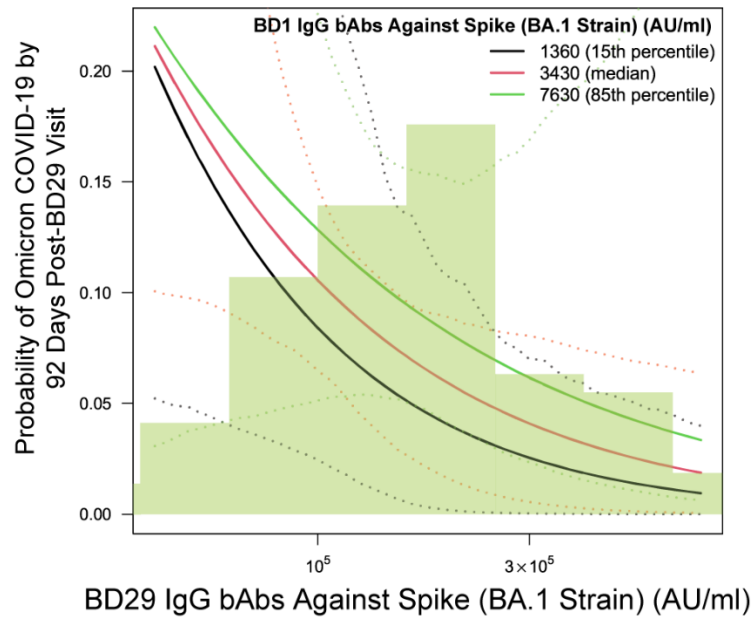

**Supplementary Fig. 27. Marginalized cumulative incidence curves of Omicron COVID-19 risk across a range of BD29 Spike IgG-BA.1 strain binding antibody (bAb) levels and within each tertile of BD1 Spike IgG-BA.1 strain bAb among SARS-CoV-2 naive participants (N = 14,047).** The solid lines indicate the mean probabilities. The dotted lines indicate bootstrap pointwise 95% CIs. The light green histogram plots the distribution of the BD29 marker. The Cox regression model adjusted for the minority indicator, heightened risk for severe COVID-19, predicted risk score, BD1 Spike IgG-BA.1 strain bAb and interaction between BD1 and BD29 Spike IgG-BA.1 strain bAb levels.

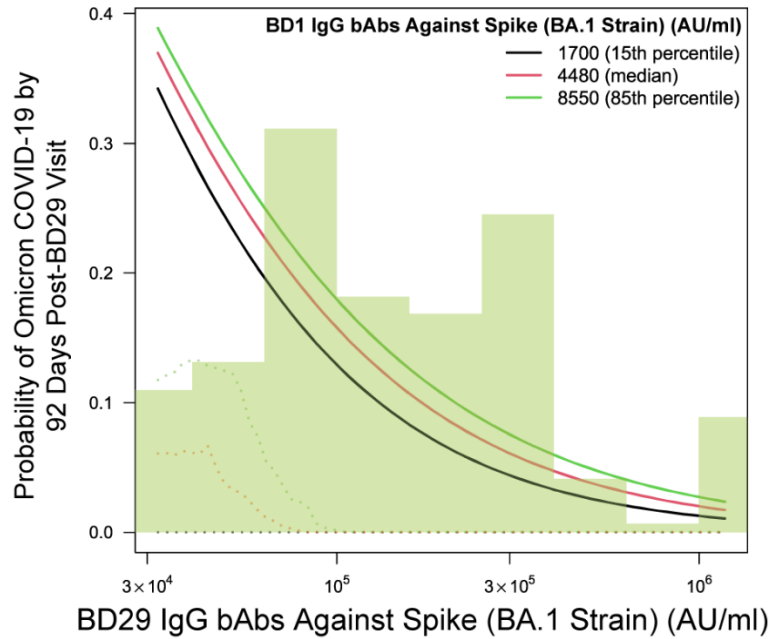

**Supplementary Fig. 28. Marginalized cumulative incidence curves of Omicron COVID-19 risk across a range of BD29 Spike IgG-BA.1 strain binding antibody (bAb) levels and within each tertile of BD1 Spike IgG-BA.1 strain bAb among non-naive participants (N = 204).** The solid lines indicate the mean probabilities. The dotted lines indicate bootstrap pointwise 95% CIs. The light green histogram plots the distribution of the BD29 marker. The Cox regression model adjusted for the minority indicator, heightened risk for severe COVID-19, predicted risk score, BD1 Spike IgG-BA.1 strain bAb and interaction between BD1 and BD29 Spike IgG-BA.1 strain bAb levels.

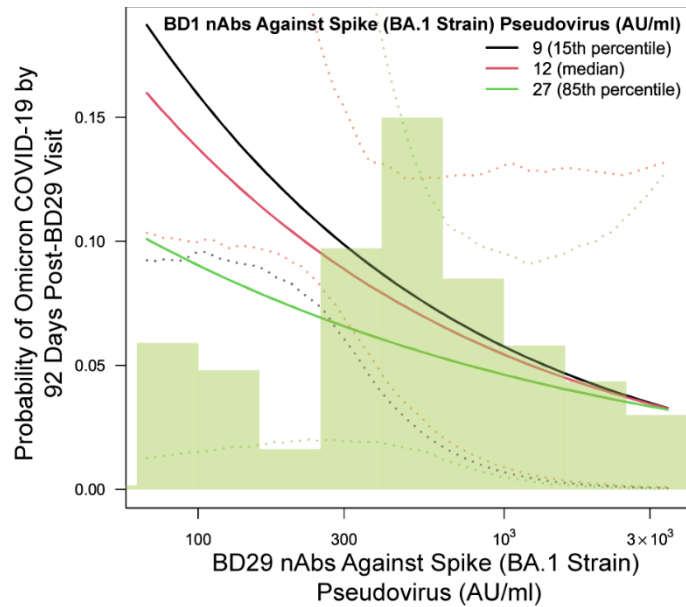

**Supplementary Fig. 29. Marginalized cumulative incidence curves of Omicron COVID-19 risk across a range of BD29 nAb BA.1 levels and within each tertile of BD1 BA.1 strain neutralizing antibody (nAb) level among SARS-CoV-2 naive participants (N = 14,047).** The solid lines indicate the mean probabilities. The dotted lines indicate bootstrap pointwise 95% CIs. The light green histogram plots the distribution of the BD29 marker. The Cox regression model adjusted for the minority indicator, heightened risk for severe COVID-19, predicted risk score, BD1 BA.1 strain nAb and interaction between BD1 and BD29 BA.1 strain nAb levels.

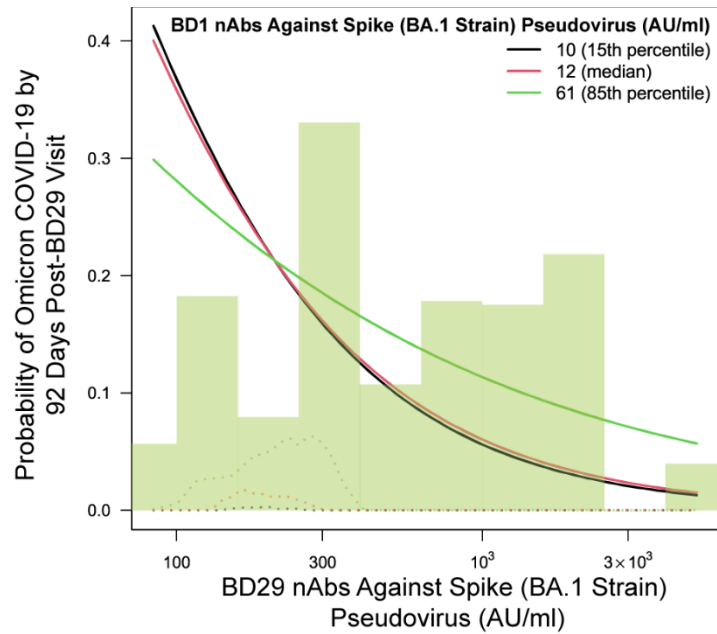

**Supplementary Fig. 30. Marginalized cumulative incidence curves of Omicron COVID-19 risk across a range of BD29 BA.1 strain neutralizing antibody (nAb) levels and within each tertile of BD1 BA.1 strain nAb among non-naive participants (N = 204).** The solid lines indicate the mean probabilities. The dotted lines indicate bootstrap pointwise 95% CIs. The light green histogram plots the distribution of the BD29 marker. The Cox regression model adjusted for the minority indicator, heightened risk for severe COVID-19, predicted risk score, BD1 BA.1 strain nAb and interaction between BD1 and BD29 BA.1 strain nAb levels.

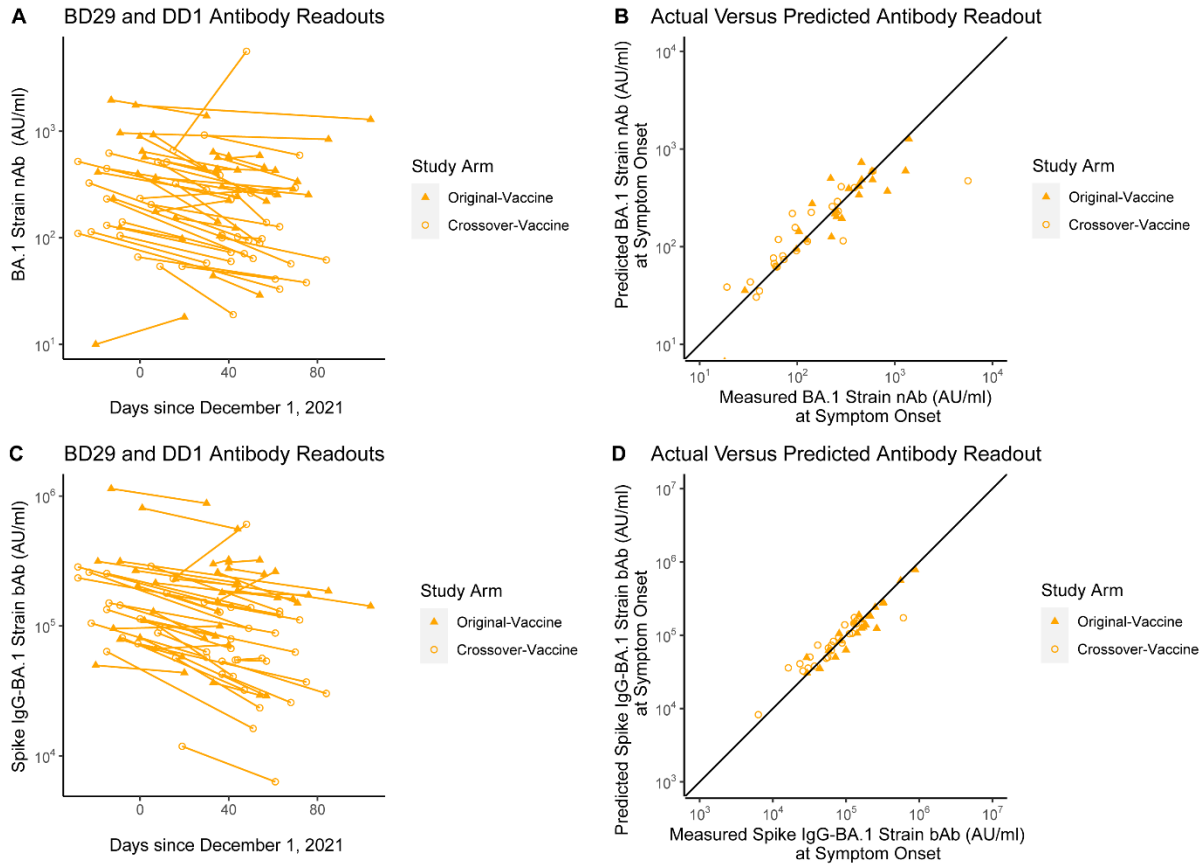

**Supplementary Fig. 31. (A, C) BD29 and DD1 antibody levels and (B, D) predicted versus actual antibody levels at DD1 for (A, B) BA.1 strain neutralizing antibody (nAb) and (C, D) Spike IgG-BA.1 strain binding antibody (bAb) levels among SARS-CoV-2 naive participants.** Filled orange triangles designate the original-vaccine arm; open orange circles designate the crossover-vaccine arm. The median slope for BA.1 strain nAbs was -0.0044 per day (half-life 68 days). The median slope for Spike IgG-BA.1 strain bAbs was -0.0034 per day (half-life 80 days) (N=47).

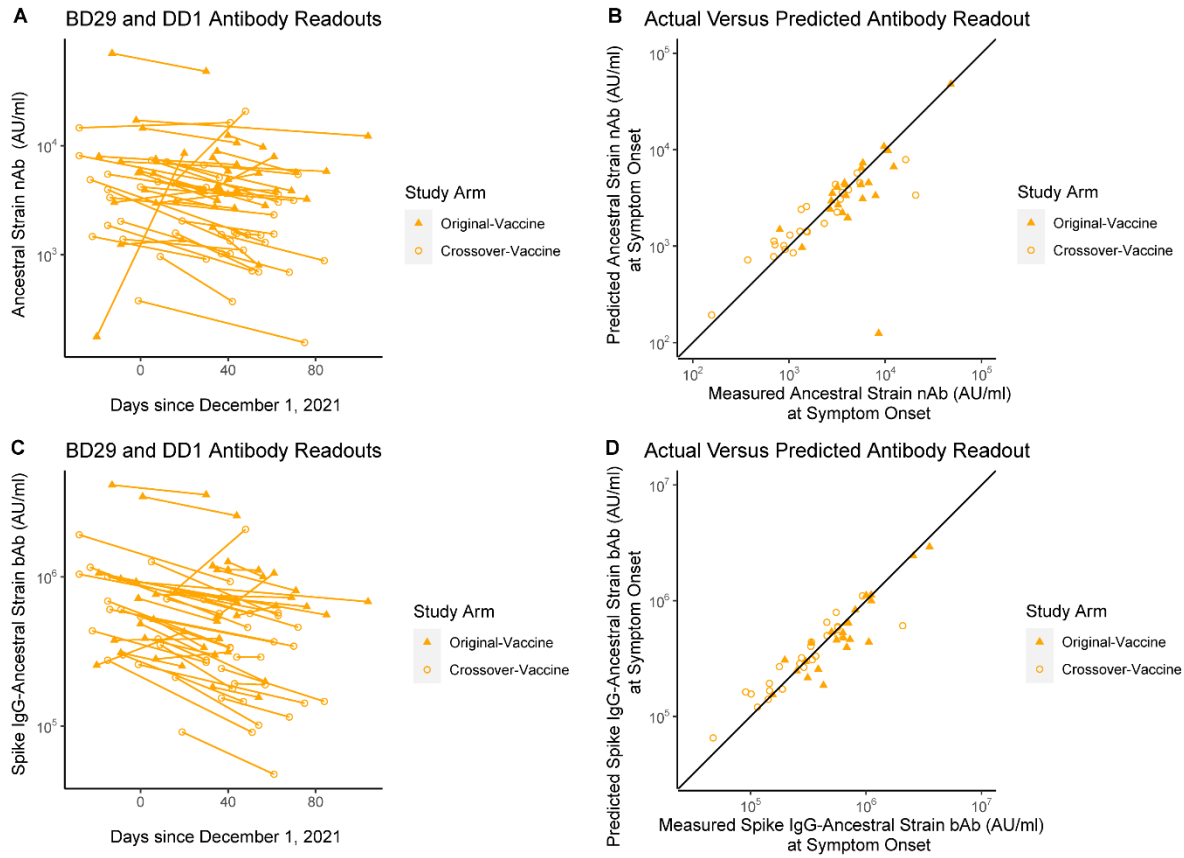

**Supplementary Fig. 32. (A, C) BD29 and DD1 antibody levels and (B, D) predicted versus actual antibody levels at DD1 for (A, B) Ancestral strain neutralizing antibody (nAb) and (C, D) Spike IgG-Ancestral strain binding antibody (bAb) level among SARS-CoV-2 naive participants.** Filled orange triangles designate the original-vaccine arm; open orange circles designate the crossover-vaccine arm. -0.0025. The median slope for Ancestral strain nAbs was -0.0039 per day (half-life 78 days). The median slope for Spike IgG-BA.1 strain bAbs was -0.0035 per day (half-life 86 days). (N=47)

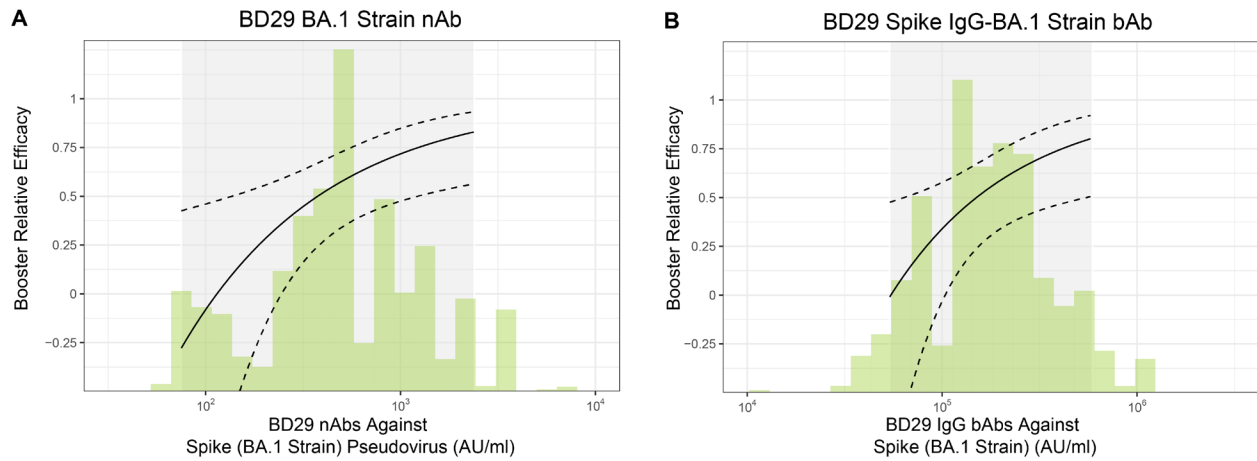

**Supplementary Fig. 33. Correlate of booster relative efficacy curves against Omicron COVID-19 among SARS-CoV-2 naive participants as a function of measured antibody level at BD29.** A) BD29 BA.1 strain nAb, B) BD29 Spike IgG-BA.1 strain bAb. The solid lines show the relative efficacy of three-dose mRNA-1273 vs. two-dose mRNA-1273. The dashed black lines are 95% confidence intervals. The green histograms are an estimate of the density of BD29 antibody marker level in per-protocol boosted SARS-CoV-2 naive participants. The grey shades indicate the middle 90th (5th percentile to 95th percentile) of the marker distribution.



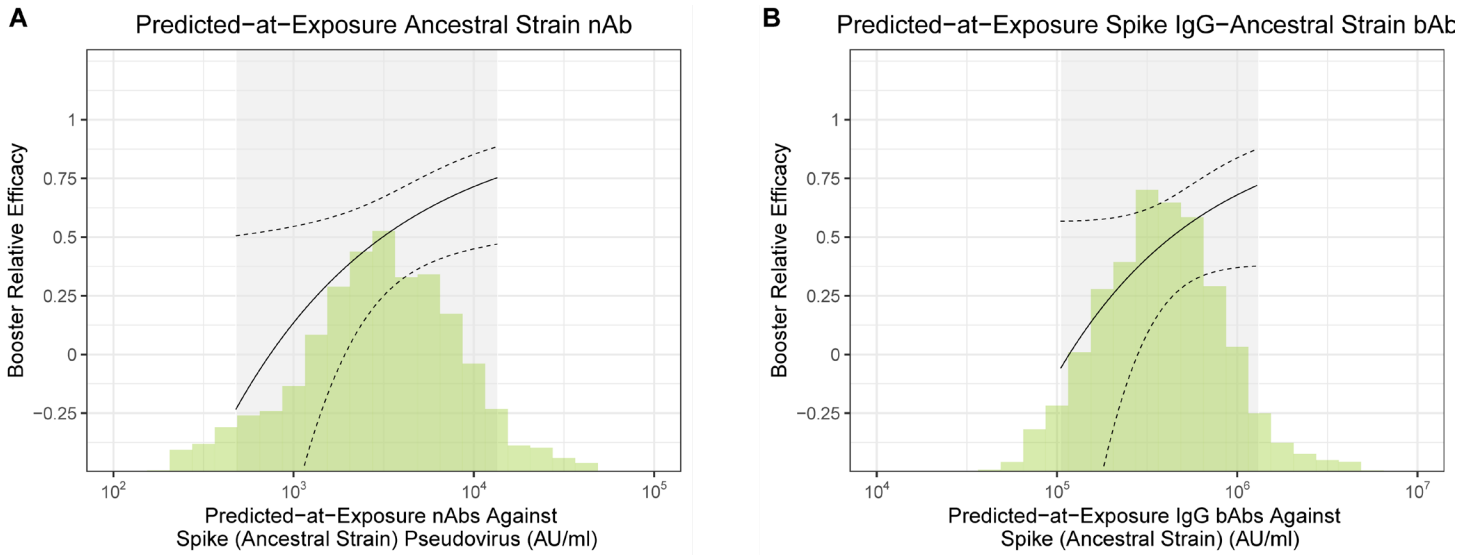

**Supplementary Fig. 34. Booster relative efficacy against Omicron COVID-19 among SARS-CoV-2 naive participants (N=2464) as a function of the predicted antibody level [A: Ancestral strain neutralizing antibody (nAb), B: Spike IgG-Ancestral strain binding antibody (bAb)] at the time of exposure to SARS-CoV-2.** The solid lines indicate the mean relative efficacy of three-dose mRNA-1273 vs. two-dose mRNA-1273. The dotted lines indicate bootstrap pointwise 95% CIs. The light green histogram plots the distribution of the BD29 marker. The grey shades indicate the middle 90<sup>th</sup> (5<sup>th</sup> percentile to 95<sup>th</sup> percentile) of the marker distribution.

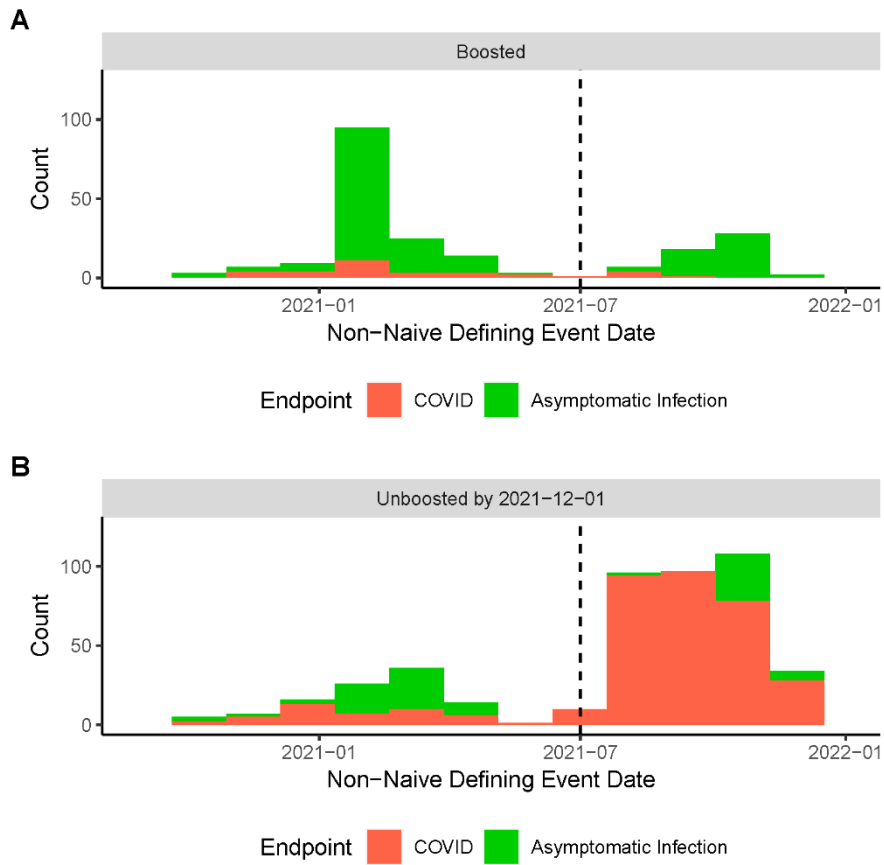

**Supplementary Fig. 35. Distribution of the day of the non-naive defining event for (A) boosted (N=282) and (B) unboosted participants (N=378).**

**Supplementary Table 10. Discrete Super Learner performance across all 92 variable sets sorted by cross-validated area under the ROC (CV-AUC) performance for predicting occurrence of Omicron COVID-19 in SARS-CoV-2 naive per-protocol boosted participants.** bAb = binding antibody; BRF = baseline risk factors; fold-rise = BD29/BD1; nAb = neutralizing antibody.

| Variable Set                                                                                                                                                                                                                                                                                                                                                         | CV-AUC (95% CI)      |
|----------------------------------------------------------------------------------------------------------------------------------------------------------------------------------------------------------------------------------------------------------------------------------------------------------------------------------------------------------------------|----------------------|
| BRF + BD29-bAb-Spike-BA.1 + BD29-bAb-Spike-Ancestral + BD29-bAb-RBD-Ancestral + BD29-nAb-BA.1 + BD29-nAb-Ancestral + Fold-rise-bAb-Spike-BA.1 + Fold-rise-bAb-Spike-Ancestral + Fold-rise-bAb-RBD-Ancestral + Fold-rise-nAb-BA.1 + Fold-rise-nAb-Ancestral                                                                                                           | 0.686 [0.600, 0.761] |
| BRF + BD1-bAb-RBD-Ancestral + BD1-nAb-BA.1 + BD1-nAb-Ancestral + Fold-rise-bAb-RBD-Ancestral + Fold-rise-nAb-BA.1 + Fold-rise-nAb-Ancestral                                                                                                                                                                                                                          | 0.686 [0.600, 0.761] |
| BRF + BD1-bAb-Spike-BA.1 + BD1-bAb-Spike-Ancestral + BD1-nAb-BA.1 + BD1-nAb-Ancestral + BD29-bAb-Spike-BA.1 + BD29-bAb-Spike-Ancestral + BD29-nAb-BA.1 + BD29-nAb-Ancestral                                                                                                                                                                                          | 0.686 [0.600, 0.761] |
| BRF + BD29-bAb-Spike-BA.1 + BD29-bAb-Spike-Ancestral + BD29-nAb-BA.1 + BD29-nAb-Ancestral                                                                                                                                                                                                                                                                            | 0.685 [0.599, 0.760] |
| BRF + BD1-bAb-Spike-BA.1 + BD1-bAb-Spike-Ancestral + BD1-bAb-RBD-Ancestral + BD1-nAb-BA.1 + BD1-nAb-Ancestral + BD29-bAb-Spike-BA.1 + BD29-bAb-Spike-Ancestral + BD29-bAb-RBD-Ancestral + BD29-nAb-BA.1 + BD29-nAb-Ancestral                                                                                                                                         | 0.685 [0.599, 0.760] |
| BRF + BD1-bAb-Spike-BA.1 + BD1-bAb-Spike-Ancestral + BD1-bAb-RBD-Ancestral + BD1-nAb-BA.1 + BD1-nAb-Ancestral + BD29-bAb-Spike-BA.1 + BD29-bAb-Spike-Ancestral + BD29-bAb-RBD-Ancestral + BD29-nAb-BA.1 + BD29-nAb-Ancestral + Fold-rise-bAb-Spike-BA.1 + Fold-rise-bAb-Spike-Ancestral + Fold-rise-bAb-RBD-Ancestral + Fold-rise-nAb-BA.1 + Fold-rise-nAb-Ancestral | 0.684 [0.598, 0.760] |
| BRF + BD29-nAb-BA.1 + Fold-rise-nAb-BA.1                                                                                                                                                                                                                                                                                                                             | 0.684 [0.598, 0.759] |
| BRF + BD1-bAb-RBD-Ancestral + BD1-nAb-BA.1 + BD1-nAb-Ancestral + BD29-bAb-RBD-Ancestral + BD29-nAb-BA.1 + BD29-nAb-Ancestral                                                                                                                                                                                                                                         | 0.682 [0.596, 0.758] |
| BRF + BD29-nAb-BA.1 + BD29-nAb-Ancestral                                                                                                                                                                                                                                                                                                                             | 0.682 [0.597, 0.757] |
| BRF + BD29-nAb-BA.1 + BD29-nAb-Ancestral + Fold-rise-nAb-BA.1 + Fold-rise-nAb-Ancestral                                                                                                                                                                                                                                                                              | 0.681 [0.595, 0.756] |
| BRF + BD1-nAb-BA.1 + BD1-nAb-Ancestral + BD29-nAb-BA.1 + BD29-nAb-Ancestral                                                                                                                                                                                                                                                                                          | 0.681 [0.594, 0.756] |
| BRF + BD29-bAb-Spike-BA.1 + BD29-bAb-Spike-Ancestral + BD29-nAb-BA.1 + BD29-nAb-Ancestral + Fold-rise-bAb-Spike-BA.1 + Fold-rise-bAb-Spike-Ancestral + Fold-rise-nAb-BA.1 + Fold-rise-nAb-Ancestral                                                                                                                                                                  | 0.681 [0.595, 0.756] |
| BRF + BD1-bAb-Spike-BA.1 + BD1-nAb-BA.1 + BD29-bAb-Spike-BA.1 + BD29-nAb-BA.1                                                                                                                                                                                                                                                                                        | 0.680 [0.593, 0.755] |
| BRF + BD29-bAb-Spike-BA.1 + BD29-nAb-BA.1 + Fold-rise-bAb-Spike-BA.1 + Fold-rise-nAb-BA.1                                                                                                                                                                                                                                                                            | 0.679 [0.593, 0.755] |
| BRF + BD1-bAb-Spike-BA.1 + BD1-bAb-Spike-Ancestral + BD1-nAb-BA.1 + BD1-nAb-Ancestral + Fold-rise-bAb-Spike-BA.1 + Fold-rise-bAb-Spike-Ancestral + Fold-rise-nAb-BA.1 + Fold-rise-nAb-Ancestral                                                                                                                                                                      | 0.679 [0.592, 0.755] |
| BRF + BD1-nAb-BA.1 + BD29-nAb-BA.1                                                                                                                                                                                                                                                                                                                                   | 0.678 [0.592, 0.754] |
| BRF + BD1-bAb-Spike-BA.1 + BD1-bAb-Spike-Ancestral + BD1-bAb-RBD-Ancestral + BD1-nAb-BA.1 + BD1-nAb-Ancestral + Fold-rise-bAb-Spike-BA.1 + Fold-rise-bAb-Spike-Ancestral + Fold-rise-bAb-RBD-Ancestral + Fold-rise-nAb-BA.1 + Fold-rise-nAb-Ancestral                                                                                                                | 0.678 [0.592, 0.754] |
| BRF + BD1-bAb-Spike-BA.1 + BD1-nAb-BA.1 + Fold-rise-bAb-Spike-BA.1 + Fold-rise-nAb-BA.1                                                                                                                                                                                                                                                                              | 0.678 [0.591, 0.754] |
| BRF + BD29-bAb-RBD-Ancestral + BD29-nAb-BA.1 + BD29-nAb-Ancestral + Fold-rise-bAb-RBD-Ancestral + Fold-rise-nAb-BA.1 + Fold-rise-nAb-Ancestral                                                                                                                                                                                                                       | 0.678 [0.592, 0.753] |

|                                                                                                                                                                        |                      |
|------------------------------------------------------------------------------------------------------------------------------------------------------------------------|----------------------|
| BRF + BD29-bAb-RBD-Ancestral + BD29-nAb-BA.1 + BD29-nAb-Ancestral                                                                                                      | 0.677 [0.591, 0.753] |
| BRF + BD29-bAb-Spike-BA.1 + BD29-nAb-BA.1                                                                                                                              | 0.677 [0.591, 0.753] |
| BRF + BD29-nAb-BA.1                                                                                                                                                    | 0.677 [0.591, 0.753] |
| BRF + BD1-nAb-BA.1 + BD1-nAb-Ancestral + Fold-rise-nAb-BA.1 + Fold-rise-nAb-Ancestral                                                                                  | 0.677 [0.590, 0.753] |
| BRF + BD1-nAb-BA.1 + Fold-rise-nAb-BA.1                                                                                                                                | 0.673 [0.586, 0.750] |
| BRF + BD29-bAb-Spike-Ancestral + BD29-nAb-Ancestral                                                                                                                    | 0.662 [0.575, 0.740] |
| BRF + BD29-nAb-Ancestral                                                                                                                                               | 0.659 [0.572, 0.737] |
| BRF + BD29-bAb-Spike-BA.1 + BD29-bAb-Spike-Ancestral + BD29-bAb-RBD-Ancestral                                                                                          | 0.659 [0.571, 0.738] |
| BRF + BD1-bAb-Spike-Ancestral + BD1-nAb-Ancestral + BD29-bAb-Spike-Ancestral + BD29-nAb-Ancestral                                                                      | 0.659 [0.571, 0.737] |
| BRF + BD29-bAb-RBD-Ancestral + BD29-nAb-Ancestral                                                                                                                      | 0.657 [0.569, 0.735] |
| BRF + BD1-bAb-Spike-Ancestral + BD1-bAb-RBD-Ancestral + BD1-nAb-Ancestral + BD29-bAb-Spike-Ancestral + BD29-bAb-RBD-Ancestral + BD29-nAb-Ancestral                     | 0.657 [0.568, 0.736] |
| BRF + BD29-bAb-Spike-Ancestral + BD29-bAb-RBD-Ancestral + BD29-nAb-Ancestral + Fold-rise-bAb-Spike-Ancestral + Fold-rise-bAb-RBD-Ancestral + Fold-rise-nAb-Ancestral   | 0.656 [0.568, 0.735] |
| BRF + BD1-bAb-Spike-BA.1 + BD1-bAb-Spike-Ancestral + BD1-bAb-RBD-Ancestral + BD29-bAb-Spike-BA.1 + BD29-bAb-Spike-Ancestral + BD29-bAb-RBD-Ancestral                   | 0.656 [0.568, 0.734] |
| BRF + BD1-nAb-Ancestral + BD29-nAb-Ancestral                                                                                                                           | 0.655 [0.567, 0.734] |
| BRF + BD29-nAb-Ancestral + Fold-rise-nAb-Ancestral                                                                                                                     | 0.654 [0.566, 0.732] |
| BRF + BD29-bAb-Spike-Ancestral + BD29-nAb-Ancestral + Fold-rise-bAb-Spike-Ancestral + Fold-rise-nAb-Ancestral                                                          | 0.653 [0.565, 0.732] |
| BRF + BD29-bAb-RBD-Ancestral + BD29-nAb-Ancestral + Fold-rise-bAb-RBD-Ancestral + Fold-rise-nAb-Ancestral                                                              | 0.651 [0.563, 0.730] |
| BRF + BD1-bAb-RBD-Ancestral + BD1-nAb-Ancestral + BD29-bAb-RBD-Ancestral + BD29-nAb-Ancestral                                                                          | 0.650 [0.562, 0.729] |
| BRF + BD1-bAb-Spike-Ancestral + BD1-bAb-RBD-Ancestral + BD29-bAb-Spike-Ancestral + BD29-bAb-RBD-Ancestral                                                              | 0.647 [0.557, 0.726] |
| BRF + BD29-bAb-Spike-Ancestral + BD29-bAb-RBD-Ancestral                                                                                                                | 0.646 [0.557, 0.726] |
| BRF + BD29-bAb-Spike-Ancestral + BD29-bAb-RBD-Ancestral + Fold-rise-bAb-Spike-Ancestral + Fold-rise-bAb-RBD-Ancestral                                                  | 0.645 [0.555, 0.725] |
| BRF + BD1-bAb-Spike-BA.1 + BD1-nAb-BA.1                                                                                                                                | 0.641 [0.552, 0.721] |
| BRF + BD1-bAb-Spike-BA.1 + BD1-bAb-Spike-Ancestral + BD1-nAb-BA.1 + BD1-nAb-Ancestral                                                                                  | 0.640 [0.551, 0.720] |
| BRF + BD1-bAb-RBD-Ancestral + BD1-nAb-BA.1 + BD1-nAb-Ancestral                                                                                                         | 0.637 [0.548, 0.718] |
| BRF + BD1-nAb-Ancestral + Fold-rise-nAb-Ancestral                                                                                                                      | 0.637 [0.548, 0.717] |
| BRF + BD29-bAb-Spike-BA.1 + BD29-bAb-Spike-Ancestral + BD29-bAb-RBD-Ancestral + Fold-rise-bAb-Spike-BA.1 + Fold-rise-bAb-Spike-Ancestral + Fold-rise-bAb-RBD-Ancestral | 0.635 [0.546, 0.716] |
| BRF + BD1-nAb-BA.1 + BD1-nAb-Ancestral                                                                                                                                 | 0.633 [0.544, 0.714] |
| BRF + BD1-nAb-BA.1                                                                                                                                                     | 0.632 [0.543, 0.713] |
| BRF + BD1-bAb-Spike-Ancestral + BD1-nAb-Ancestral + Fold-rise-bAb-Spike-Ancestral + Fold-rise-nAb-Ancestral                                                            | 0.629 [0.540, 0.710] |
| BRF + BD29-bAb-RBD-Ancestral + Fold-rise-bAb-RBD-Ancestral                                                                                                             | 0.625 [0.537, 0.706] |
| BRF + BD1-bAb-Spike-Ancestral + BD1-bAb-RBD-Ancestral + BD1-nAb-Ancestral + Fold-rise-bAb-Spike-Ancestral + Fold-rise-bAb-RBD-Ancestral + Fold-rise-nAb-Ancestral      | 0.623 [0.534, 0.704] |

|                                                                                                                                                                     |                      |
|---------------------------------------------------------------------------------------------------------------------------------------------------------------------|----------------------|
| BRF + BD29-bAb-Spike-BA.1 + BD29-bAb-Spike-Ancestral                                                                                                                | 0.622 [0.533, 0.703] |
| BRF + BD1-bAb-RBD-Ancestral + BD29-bAb-RBD-Ancestral                                                                                                                | 0.621 [0.533, 0.702] |
| BRF + BD1-bAb-Spike-Ancestral + BD1-bAb-RBD-Ancestral + Fold-rise-bAb-Spike-Ancestral + Fold-rise-bAb-RBD-Ancestral                                                 | 0.620 [0.530, 0.702] |
| BRF + BD29-bAb-RBD-Ancestral                                                                                                                                        | 0.620 [0.531, 0.701] |
| BRF + BD29-bAb-Spike-BA.1 + BD29-bAb-Spike-Ancestral + Fold-rise-bAb-Spike-BA.1 + Fold-rise-bAb-Spike-Ancestral                                                     | 0.618 [0.529, 0.699] |
| BRF + BD1-bAb-RBD-Ancestral + BD1-nAb-Ancestral + Fold-rise-bAb-RBD-Ancestral + Fold-rise-nAb-Ancestral                                                             | 0.616 [0.528, 0.698] |
| BRF + BD1-bAb-Spike-BA.1 + BD1-bAb-Spike-Ancestral + BD29-bAb-Spike-BA.1 + BD29-bAb-Spike-Ancestral                                                                 | 0.612 [0.523, 0.694] |
| BRF + BD1-bAb-RBD-Ancestral + Fold-rise-bAb-RBD-Ancestral                                                                                                           | 0.611 [0.522, 0.693] |
| BRF + BD29-bAb-Spike-BA.1 + Fold-rise-bAb-Spike-BA.1                                                                                                                | 0.605 [0.516, 0.688] |
| BRF + Fold-rise-bAb-RBD-Ancestral + Fold-rise-nAb-BA.1 + Fold-rise-nAb-Ancestral                                                                                    | 0.603 [0.514, 0.686] |
| BRF + Fold-rise-bAb-Spike-Ancestral + Fold-rise-bAb-RBD-Ancestral                                                                                                   | 0.603 [0.513, 0.686] |
| BRF + BD1-bAb-Spike-BA.1 + BD29-bAb-Spike-BA.1                                                                                                                      | 0.603 [0.514, 0.685] |
| BRF + Fold-rise-bAb-Spike-BA.1 + Fold-rise-bAb-Spike-Ancestral + Fold-rise-nAb-BA.1 + Fold-rise-nAb-Ancestral                                                       | 0.601 [0.512, 0.685] |
| BRF + Fold-rise-nAb-BA.1 + Fold-rise-nAb-Ancestral                                                                                                                  | 0.597 [0.508, 0.681] |
| BRF + BD1-bAb-Spike-BA.1 + BD1-bAb-Spike-Ancestral + BD1-bAb-RBD-Ancestral + Fold-rise-bAb-Spike-BA.1 + Fold-rise-bAb-Spike-Ancestral + Fold-rise-bAb-RBD-Ancestral | 0.597 [0.507, 0.680] |
| BRF + Fold-rise-bAb-Spike-BA.1 + Fold-rise-bAb-Spike-Ancestral + Fold-rise-bAb-RBD-Ancestral                                                                        | 0.596 [0.506, 0.680] |
| BRF + BD29-bAb-Spike-BA.1                                                                                                                                           | 0.594 [0.505, 0.677] |
| BRF + Fold-rise-bAb-Spike-BA.1 + Fold-rise-nAb-BA.1                                                                                                                 | 0.593 [0.504, 0.676] |
| BRF + BD29-bAb-Spike-Ancestral + Fold-rise-bAb-Spike-Ancestral                                                                                                      | 0.590 [0.501, 0.674] |
| BRF + BD1-bAb-Spike-BA.1 + Fold-rise-bAb-Spike-BA.1                                                                                                                 | 0.587 [0.498, 0.670] |
| BRF + Fold-rise-bAb-RBD-Ancestral + Fold-rise-nAb-Ancestral                                                                                                         | 0.586 [0.496, 0.670] |
| BRF + Fold-rise-nAb-BA.1                                                                                                                                            | 0.582 [0.493, 0.666] |
| BRF + BD1-bAb-Spike-Ancestral + BD29-bAb-Spike-Ancestral                                                                                                            | 0.579 [0.490, 0.664] |
| BRF + BD29-bAb-Spike-Ancestral                                                                                                                                      | 0.579 [0.489, 0.664] |
| BRF + BD1-bAb-Spike-BA.1 + BD1-bAb-Spike-Ancestral + Fold-rise-bAb-Spike-BA.1 + Fold-rise-bAb-Spike-Ancestral                                                       | 0.579 [0.490, 0.664] |
| BRF + Fold-rise-bAb-Spike-BA.1 + Fold-rise-bAb-Spike-Ancestral                                                                                                      | 0.578 [0.488, 0.663] |
| BRF + Fold-rise-bAb-Spike-Ancestral + Fold-rise-nAb-Ancestral                                                                                                       | 0.575 [0.484, 0.661] |
| BRF + Fold-rise-nAb-Ancestral                                                                                                                                       | 0.573 [0.482, 0.660] |
| BRF + BD1-bAb-Spike-Ancestral + Fold-rise-bAb-Spike-Ancestral                                                                                                       | 0.573 [0.483, 0.657] |
| BRF + Fold-rise-bAb-RBD-Ancestral                                                                                                                                   | 0.570 [0.481, 0.655] |
| BRF + Fold-rise-bAb-Spike-BA.1                                                                                                                                      | 0.565 [0.475, 0.650] |
| BRF + Fold-rise-bAb-Spike-Ancestral                                                                                                                                 | 0.540 [0.451, 0.627] |
| BRF + BD1-bAb-Spike-Ancestral + BD1-nAb-Ancestral                                                                                                                   | 0.534 [0.438, 0.627] |
| BRF + BD1-nAb-Ancestral                                                                                                                                             | 0.527 [0.432, 0.620] |
| BRF + BD1-bAb-Spike-BA.1 + BD1-bAb-Spike-Ancestral + BD1-bAb-RBD-Ancestral                                                                                          | 0.524 [0.417, 0.629] |
| BRF + BD1-bAb-Spike-Ancestral + BD1-bAb-RBD-Ancestral                                                                                                               | 0.523 [0.416, 0.629] |
| BRF + BD1-bAb-Spike-BA.1                                                                                                                                            | 0.522 [0.415, 0.628] |

|                                                    |                      |
|----------------------------------------------------|----------------------|
| BRF + BD1-bAb-RBD-Ancestral + BD1-nAb-Ancestral    | 0.522 [0.424, 0.618] |
| BRF + BD1-bAb-Spike-BA.1 + BD1-bAb-Spike-Ancestral | 0.518 [0.406, 0.630] |
| BRF + BD1-bAb-Spike-Ancestral                      | 0.518 [0.405, 0.629] |
| BRF + BD1-bAb-RBD-Ancestral                        | 0.517 [0.404, 0.629] |
| BRF (baseline risk factors)                        | 0.517 [0.404, 0.628] |

---

**Supplementary Table 11. Discrete Super Learner performance across all 92 variable sets sorted by cross-validated area under the ROC (CV-AUC) performance for predicting occurrence of Omicron COVID-19 in non-naive per-protocol boosted participants. bAb = binding antibody; BRF = baseline risk factors; fold-rise = BD29/BD1; nAb = neutralizing antibody.**

| Variable Set                                                                                                                                                                                                                                          | CV-AUC (95% CI)      |
|-------------------------------------------------------------------------------------------------------------------------------------------------------------------------------------------------------------------------------------------------------|----------------------|
| BRF + BD29-bAb-RBD-Ancestral + BD29-nAb-Ancestral                                                                                                                                                                                                     | 0.712 [0.558, 0.829] |
| BRF + Fold-rise-bAb-RBD-Ancestral + Fold-rise-nAb-Ancestral                                                                                                                                                                                           | 0.683 [0.530, 0.804] |
| BRF + BD1-bAb-RBD-Ancestral + BD1-nAb-Ancestral + Fold-rise-bAb-RBD-Ancestral + Fold-rise-nAb-Ancestral                                                                                                                                               | 0.681 [0.526, 0.804] |
| BRF + Fold-rise-bAb-RBD-Ancestral + Fold-rise-nAb-BA.1 + Fold-rise-nAb-Ancestral                                                                                                                                                                      | 0.680 [0.527, 0.802] |
| BRF + BD1-bAb-RBD-Ancestral + BD1-nAb-BA.1 + BD1-nAb-Ancestral + Fold-rise-bAb-RBD-Ancestral + Fold-rise-nAb-BA.1 + Fold-rise-nAb-Ancestral                                                                                                           | 0.673 [0.516, 0.799] |
| BRF + BD1-bAb-Spike-Ancestral + BD1-bAb-RBD-Ancestral + BD1-nAb-Ancestral + Fold-rise-bAb-Spike-Ancestral + Fold-rise-bAb-RBD-Ancestral + Fold-rise-nAb-Ancestral                                                                                     | 0.666 [0.510, 0.792] |
| BRF + BD1-bAb-Spike-Ancestral + BD1-bAb-RBD-Ancestral + Fold-rise-bAb-Spike-Ancestral + Fold-rise-bAb-RBD-Ancestral                                                                                                                                   | 0.657 [0.499, 0.787] |
| BRF + BD29-bAb-Spike-Ancestral + BD29-nAb-Ancestral                                                                                                                                                                                                   | 0.656 [0.500, 0.784] |
| BRF + Fold-rise-bAb-Spike-Ancestral + Fold-rise-bAb-RBD-Ancestral                                                                                                                                                                                     | 0.654 [0.497, 0.784] |
| BRF + Fold-rise-bAb-RBD-Ancestral                                                                                                                                                                                                                     | 0.651 [0.496, 0.780] |
| BRF + BD1-bAb-RBD-Ancestral + Fold-rise-bAb-RBD-Ancestral                                                                                                                                                                                             | 0.650 [0.493, 0.780] |
| BRF + BD1-bAb-Spike-BA.1 + BD1-bAb-Spike-Ancestral + BD1-bAb-RBD-Ancestral + BD1-nAb-BA.1 + BD1-nAb-Ancestral + Fold-rise-bAb-Spike-BA.1 + Fold-rise-bAb-Spike-Ancestral + Fold-rise-bAb-RBD-Ancestral + Fold-rise-nAb-BA.1 + Fold-rise-nAb-Ancestral | 0.646 [0.491, 0.775] |
| BRF + BD1-bAb-Spike-BA.1 + BD1-bAb-Spike-Ancestral + BD1-bAb-RBD-Ancestral + Fold-rise-bAb-Spike-BA.1 + Fold-rise-bAb-Spike-Ancestral + Fold-rise-bAb-RBD-Ancestral                                                                                   | 0.643 [0.478, 0.782] |
| BRF + Fold-rise-bAb-Spike-BA.1 + Fold-rise-bAb-Spike-Ancestral + Fold-rise-bAb-RBD-Ancestral                                                                                                                                                          | 0.640 [0.475, 0.780] |
| BRF + Fold-rise-bAb-Spike-Ancestral + Fold-rise-nAb-Ancestral                                                                                                                                                                                         | 0.639 [0.481, 0.772] |
| BRF + BD1-bAb-RBD-Ancestral + BD1-nAb-Ancestral + BD29-bAb-RBD-Ancestral + BD29-nAb-Ancestral                                                                                                                                                         | 0.636 [0.478, 0.770] |
| BRF + BD29-bAb-RBD-Ancestral + Fold-rise-bAb-RBD-Ancestral                                                                                                                                                                                            | 0.633 [0.475, 0.767] |
| BRF + BD1-bAb-Spike-Ancestral + BD1-nAb-Ancestral + Fold-rise-bAb-Spike-Ancestral + Fold-rise-nAb-Ancestral                                                                                                                                           | 0.625 [0.468, 0.760] |
| BRF + Fold-rise-bAb-Spike-BA.1 + Fold-rise-bAb-Spike-Ancestral                                                                                                                                                                                        | 0.624 [0.464, 0.761] |
| BRF + BD1-bAb-Spike-BA.1 + BD1-bAb-Spike-Ancestral + BD1-nAb-BA.1 + BD1-nAb-Ancestral + Fold-rise-bAb-Spike-BA.1 + Fold-rise-bAb-Spike-Ancestral + Fold-rise-nAb-BA.1 + Fold-rise-nAb-Ancestral                                                       | 0.622 [0.463, 0.759] |
| BRF + Fold-rise-bAb-Spike-BA.1 + Fold-rise-bAb-Spike-Ancestral + Fold-rise-nAb-BA.1 + Fold-rise-nAb-Ancestral                                                                                                                                         | 0.622 [0.465, 0.756] |
| BRF + BD1-bAb-RBD-Ancestral + BD1-nAb-BA.1 + BD1-nAb-Ancestral                                                                                                                                                                                        | 0.621 [0.465, 0.756] |
| BRF + BD1-nAb-Ancestral + Fold-rise-nAb-Ancestral                                                                                                                                                                                                     | 0.621 [0.466, 0.755] |
| BRF + BD1-bAb-Spike-BA.1 + BD1-bAb-Spike-Ancestral + Fold-rise-bAb-Spike-BA.1 + Fold-rise-bAb-Spike-Ancestral                                                                                                                                         | 0.619 [0.459, 0.757] |
| BRF + BD29-bAb-RBD-Ancestral + BD29-nAb-Ancestral + Fold-rise-bAb-RBD-Ancestral + Fold-rise-nAb-Ancestral                                                                                                                                             | 0.619 [0.460, 0.756] |

|                                                                                                                                                                        |                      |
|------------------------------------------------------------------------------------------------------------------------------------------------------------------------|----------------------|
| BRF + BD1-nAb-BA.1 + BD1-nAb-Ancestral                                                                                                                                 | 0.617 [0.460, 0.753] |
| BRF + BD29-bAb-RBD-Ancestral + BD29-nAb-BA.1 + BD29-nAb-Ancestral                                                                                                      | 0.616 [0.460, 0.752] |
| BRF + BD29-bAb-Spike-Ancestral + BD29-bAb-RBD-Ancestral + Fold-rise-bAb-Spike-Ancestral + Fold-rise-bAb-RBD-Ancestral                                                  | 0.615 [0.455, 0.753] |
| BRF + Fold-rise-bAb-Spike-Ancestral                                                                                                                                    | 0.614 [0.457, 0.751] |
| BRF + BD29-bAb-Spike-Ancestral + BD29-bAb-RBD-Ancestral + BD29-nAb-Ancestral + Fold-rise-bAb-Spike-Ancestral + Fold-rise-bAb-RBD-Ancestral + Fold-rise-nAb-Ancestral   | 0.614 [0.456, 0.751] |
| BRF + Fold-rise-bAb-Spike-BA.1                                                                                                                                         | 0.611 [0.454, 0.748] |
| BRF + BD1-bAb-Spike-Ancestral + Fold-rise-bAb-Spike-Ancestral                                                                                                          | 0.609 [0.452, 0.747] |
| BRF + BD29-nAb-BA.1 + BD29-nAb-Ancestral                                                                                                                               | 0.607 [0.443, 0.752] |
| BRF + BD1-bAb-Spike-BA.1 + Fold-rise-bAb-Spike-BA.1                                                                                                                    | 0.606 [0.452, 0.741] |
| BRF + BD1-bAb-RBD-Ancestral + BD1-nAb-Ancestral                                                                                                                        | 0.603 [0.443, 0.744] |
| BRF + BD1-bAb-RBD-Ancestral + BD29-bAb-RBD-Ancestral                                                                                                                   | 0.603 [0.444, 0.742] |
| BRF + BD1-nAb-BA.1 + BD1-nAb-Ancestral + Fold-rise-nAb-BA.1 + Fold-rise-nAb-Ancestral                                                                                  | 0.602 [0.443, 0.742] |
| BRF + BD1-bAb-Spike-Ancestral + BD1-nAb-Ancestral + BD29-bAb-Spike-Ancestral + BD29-nAb-Ancestral                                                                      | 0.601 [0.444, 0.738] |
| BRF + BD1-bAb-Spike-BA.1 + BD1-bAb-Spike-Ancestral + BD1-nAb-BA.1 + BD1-nAb-Ancestral                                                                                  | 0.599 [0.440, 0.739] |
| BRF + Fold-rise-bAb-Spike-BA.1 + Fold-rise-nAb-BA.1                                                                                                                    | 0.598 [0.441, 0.736] |
| BRF + Fold-rise-nAb-BA.1 + Fold-rise-nAb-Ancestral                                                                                                                     | 0.597 [0.423, 0.752] |
| BRF + BD29-bAb-Spike-BA.1 + BD29-bAb-Spike-Ancestral + BD29-bAb-RBD-Ancestral                                                                                          | 0.596 [0.441, 0.734] |
| BRF + BD29-bAb-Spike-Ancestral + Fold-rise-bAb-Spike-Ancestral                                                                                                         | 0.595 [0.427, 0.745] |
| BRF + BD29-bAb-Spike-Ancestral + BD29-nAb-Ancestral + Fold-rise-bAb-Spike-Ancestral + Fold-rise-nAb-Ancestral                                                          | 0.595 [0.415, 0.756] |
| BRF + BD1-bAb-Spike-Ancestral + BD1-bAb-RBD-Ancestral + BD1-nAb-Ancestral + BD29-bAb-Spike-Ancestral + BD29-bAb-RBD-Ancestral + BD29-nAb-Ancestral                     | 0.594 [0.434, 0.737] |
| BRF + BD1-bAb-Spike-BA.1 + BD1-nAb-BA.1 + Fold-rise-bAb-Spike-BA.1 + Fold-rise-nAb-BA.1                                                                                | 0.593 [0.438, 0.731] |
| BRF + BD1-bAb-Spike-Ancestral + BD1-nAb-Ancestral                                                                                                                      | 0.591 [0.432, 0.732] |
| BRF + BD1-bAb-RBD-Ancestral + BD1-nAb-BA.1 + BD1-nAb-Ancestral + BD29-bAb-RBD-Ancestral + BD29-nAb-BA.1 + BD29-nAb-Ancestral                                           | 0.590 [0.432, 0.732] |
| BRF + BD29-bAb-RBD-Ancestral + BD29-nAb-BA.1 + BD29-nAb-Ancestral + Fold-rise-bAb-RBD-Ancestral + Fold-rise-nAb-BA.1 + Fold-rise-nAb-Ancestral                         | 0.590 [0.434, 0.730] |
| BRF + BD29-bAb-Spike-BA.1 + BD29-bAb-Spike-Ancestral + BD29-bAb-RBD-Ancestral + Fold-rise-bAb-Spike-BA.1 + Fold-rise-bAb-Spike-Ancestral + Fold-rise-bAb-RBD-Ancestral | 0.590 [0.432, 0.731] |
| BRF + BD1-nAb-BA.1 + BD1-nAb-Ancestral + BD29-nAb-BA.1 + BD29-nAb-Ancestral                                                                                            | 0.590 [0.425, 0.737] |
| BRF + BD1-nAb-Ancestral + BD29-nAb-Ancestral                                                                                                                           | 0.586 [0.423, 0.733] |
| BRF + Fold-rise-nAb-Ancestral                                                                                                                                          | 0.586 [0.428, 0.728] |
| BRF + BD29-bAb-Spike-BA.1 + BD29-bAb-Spike-Ancestral + Fold-rise-bAb-Spike-BA.1 + Fold-rise-bAb-Spike-Ancestral                                                        | 0.585 [0.409, 0.745] |
| BRF + BD1-bAb-Spike-Ancestral + BD29-bAb-Spike-Ancestral                                                                                                               | 0.584 [0.419, 0.733] |
| BRF + BD29-bAb-Spike-BA.1 + Fold-rise-bAb-Spike-BA.1                                                                                                                   | 0.584 [0.415, 0.736] |
| BRF + BD1-bAb-Spike-BA.1 + BD1-bAb-Spike-Ancestral + BD1-bAb-RBD-Ancestral + BD29-bAb-Spike-BA.1 + BD29-bAb-Spike-Ancestral + BD29-bAb-RBD-Ancestral                   | 0.583 [0.418, 0.733] |
| BRF + BD1-nAb-Ancestral                                                                                                                                                | 0.582 [0.426, 0.724] |



|                                                                                                                                                                                                                                                                                                                                                                      |                      |
|----------------------------------------------------------------------------------------------------------------------------------------------------------------------------------------------------------------------------------------------------------------------------------------------------------------------------------------------------------------------|----------------------|
| BRF + BD29-bAb-Spike-Ancestral + BD29-bAb-RBD-Ancestral                                                                                                                                                                                                                                                                                                              | 0.580 [0.417, 0.729] |
| BRF + BD1-bAb-Spike-BA.1 + BD29-bAb-Spike-BA.1                                                                                                                                                                                                                                                                                                                       | 0.580 [0.405, 0.739] |
| BRF + BD29-bAb-Spike-BA.1 + BD29-bAb-Spike-Ancestral + BD29-nAb-BA.1 + BD29-nAb-Ancestral                                                                                                                                                                                                                                                                            | 0.578 [0.418, 0.725] |
| BRF + BD29-bAb-RBD-Ancestral                                                                                                                                                                                                                                                                                                                                         | 0.577 [0.411, 0.728] |
| BRF + BD29-nAb-Ancestral + Fold-rise-nAb-Ancestral                                                                                                                                                                                                                                                                                                                   | 0.576 [0.413, 0.725] |
| BRF + Fold-rise-nAb-BA.1                                                                                                                                                                                                                                                                                                                                             | 0.575 [0.408, 0.727] |
| BRF + BD1-bAb-Spike-Ancestral + BD1-bAb-RBD-Ancestral + BD29-bAb-Spike-Ancestral + BD29-bAb-RBD-Ancestral                                                                                                                                                                                                                                                            | 0.574 [0.404, 0.731] |
| BRF + BD1-bAb-Spike-BA.1 + BD1-bAb-Spike-Ancestral                                                                                                                                                                                                                                                                                                                   | 0.573 [0.407, 0.726] |
| BRF + BD1-bAb-Spike-BA.1 + BD1-bAb-Spike-Ancestral + BD1-bAb-RBD-Ancestral + BD1-nAb-BA.1 + BD1-nAb-Ancestral + BD29-bAb-Spike-BA.1 + BD29-bAb-Spike-Ancestral + BD29-bAb-RBD-Ancestral + BD29-nAb-BA.1 + BD29-nAb-Ancestral                                                                                                                                         | 0.573 [0.403, 0.728] |
| BRF + BD29-bAb-Spike-Ancestral                                                                                                                                                                                                                                                                                                                                       | 0.573 [0.410, 0.722] |
| BRF + BD1-bAb-Spike-Ancestral + BD1-bAb-RBD-Ancestral                                                                                                                                                                                                                                                                                                                | 0.570 [0.406, 0.721] |
| BRF + BD29-bAb-Spike-BA.1 + BD29-bAb-Spike-Ancestral + BD29-bAb-RBD-Ancestral + BD29-nAb-BA.1 + BD29-nAb-Ancestral + Fold-rise-bAb-Spike-BA.1 + Fold-rise-bAb-Spike-Ancestral + Fold-rise-bAb-RBD-Ancestral + Fold-rise-nAb-BA.1 + Fold-rise-nAb-Ancestral                                                                                                           | 0.569 [0.412, 0.713] |
| BRF + BD1-bAb-Spike-BA.1 + BD1-bAb-Spike-Ancestral + BD1-bAb-RBD-Ancestral + BD1-nAb-BA.1 + BD1-nAb-Ancestral + BD29-bAb-Spike-BA.1 + BD29-bAb-Spike-Ancestral + BD29-bAb-RBD-Ancestral + BD29-nAb-BA.1 + BD29-nAb-Ancestral + Fold-rise-bAb-Spike-BA.1 + Fold-rise-bAb-Spike-Ancestral + Fold-rise-bAb-RBD-Ancestral + Fold-rise-nAb-BA.1 + Fold-rise-nAb-Ancestral | 0.569 [0.412, 0.713] |
| BRF + BD29-nAb-BA.1 + BD29-nAb-Ancestral + Fold-rise-nAb-BA.1 + Fold-rise-nAb-Ancestral                                                                                                                                                                                                                                                                              | 0.568 [0.380, 0.742] |
| BRF + BD1-nAb-BA.1 + Fold-rise-nAb-BA.1                                                                                                                                                                                                                                                                                                                              | 0.567 [0.388, 0.733] |
| BRF + BD1-bAb-Spike-BA.1 + BD1-bAb-Spike-Ancestral + BD1-bAb-RBD-Ancestral                                                                                                                                                                                                                                                                                           | 0.566 [0.402, 0.718] |
| BRF + BD29-bAb-Spike-BA.1 + BD29-nAb-BA.1 + Fold-rise-bAb-Spike-BA.1 + Fold-rise-nAb-BA.1                                                                                                                                                                                                                                                                            | 0.565 [0.390, 0.728] |
| BRF + BD1-bAb-Spike-BA.1 + BD1-bAb-Spike-Ancestral + BD29-bAb-Spike-BA.1 + BD29-bAb-Spike-Ancestral                                                                                                                                                                                                                                                                  | 0.565 [0.403, 0.715] |
| BRF + BD29-bAb-Spike-BA.1 + BD29-bAb-Spike-Ancestral                                                                                                                                                                                                                                                                                                                 | 0.564 [0.404, 0.713] |
| BRF + BD1-bAb-Spike-BA.1                                                                                                                                                                                                                                                                                                                                             | 0.563 [0.391, 0.724] |
| BRF + BD1-bAb-Spike-Ancestral                                                                                                                                                                                                                                                                                                                                        | 0.563 [0.400, 0.715] |
| BRF + BD29-nAb-BA.1 + Fold-rise-nAb-BA.1                                                                                                                                                                                                                                                                                                                             | 0.563 [0.393, 0.720] |
| BRF + BD1-bAb-Spike-BA.1 + BD1-bAb-Spike-Ancestral + BD1-nAb-BA.1 + BD1-nAb-Ancestral + BD29-bAb-Spike-BA.1 + BD29-bAb-Spike-Ancestral + BD29-nAb-BA.1 + BD29-nAb-Ancestral                                                                                                                                                                                          | 0.562 [0.397, 0.716] |
| BRF + BD1-bAb-Spike-BA.1 + BD1-nAb-BA.1                                                                                                                                                                                                                                                                                                                              | 0.562 [0.394, 0.718] |
| BRF + BD1-bAb-RBD-Ancestral                                                                                                                                                                                                                                                                                                                                          | 0.561 [0.398, 0.713] |
| BRF (baseline risk factors)                                                                                                                                                                                                                                                                                                                                          | 0.561 [0.389, 0.720] |
| BRF + BD29-bAb-Spike-BA.1                                                                                                                                                                                                                                                                                                                                            | 0.560 [0.397, 0.712] |
| BRF + BD29-nAb-BA.1                                                                                                                                                                                                                                                                                                                                                  | 0.559 [0.389, 0.719] |
| BRF + BD1-bAb-Spike-BA.1 + BD1-nAb-BA.1 + BD29-bAb-Spike-BA.1 + BD29-nAb-BA.1                                                                                                                                                                                                                                                                                        | 0.559 [0.386, 0.721] |
| BRF + BD29-nAb-Ancestral                                                                                                                                                                                                                                                                                                                                             | 0.558 [0.377, 0.727] |
| BRF + BD29-bAb-Spike-BA.1 + BD29-nAb-BA.1                                                                                                                                                                                                                                                                                                                            | 0.557 [0.394, 0.710] |

|                                                                                                                                                                                                           |                      |
|-----------------------------------------------------------------------------------------------------------------------------------------------------------------------------------------------------------|----------------------|
| BRF + BD1-nAb-BA.1 + BD29-nAb-BA.1                                                                                                                                                                        | 0.557 [0.385, 0.718] |
| BRF + BD29-bAb-Spike-BA.1 + BD29-bAb-Spike-Ancestral + BD29-nAb-BA.1 +<br>BD29-nAb-Ancestral + Fold-rise-bAb-Spike-BA.1 + Fold-rise-bAb-Spike-Ancestral +<br>Fold-rise-nAb-BA.1 + Fold-rise-nAb-Ancestral | 0.556 [0.370, 0.731] |
| BRF + BD1-nAb-BA.1                                                                                                                                                                                        | 0.555 [0.384, 0.715] |

**Supplementary Table 12. Duke and PPD Assays Concordance Analysis: Descriptive statistics between Duke (ID50) and PPD (AU/mL) assays and by VOC (analysis sample subset: full analysis)**

| <b>Parameters</b>         | <b>D614G<br/>(n=250)</b> |            | <b>Omicron (BA.1)<br/>(n=250)</b> |            |
|---------------------------|--------------------------|------------|-----------------------------------|------------|
|                           | <b>Duke</b>              | <b>PPD</b> | <b>Duke</b>                       | <b>PPD</b> |
| Geometric mean            | 2086.4                   | 2739.3     | 639.8                             | 324.4      |
| SD (log 10 scale)         | 0.60                     | 0.56       | 0.86                              | 0.68       |
| Geometric SD              | 3.98                     | 3.59       | 7.28                              | 4.79       |
| Geometric CV              | 239.8%                   | 203.5%     | 710.2%                            | 325.6%     |
| Median                    | 2519.9                   | 2986.5     | 816.5                             | 408.5      |
| Minimum                   | 75.6                     | 78.0       | 5                                 | 10         |
| Maximum                   | 88352.6                  | 65395.0    | 99474.7                           | 18761.0    |
| LLOD                      | 10                       | 10         | 10                                | 10         |
| Percentage below the LLOD | 0.0%                     | 0.0%       | 1.2%                              | 0.0%       |
| ULOQ                      | 45118                    | 111433     | 15502.7                           | 24503      |
| Percentage above the ULOQ | 1.6%                     | 0.0%       | 4.0%                              | 0.0%       |

CV, coefficient of variation; LLOD, lower limit of detection; SD, standard deviation; ULOQ, upper limit of quantitation.

**Supplementary Table 13. Duke and PPD Assays Concordance Analysis: Correlations Between Duke (ID50) and PPD (AU/mL) Assays (Analysis Sample Subset: Full Analysis Set; N = 250)**

| VOC                       | Pearson<br>Correlation*<br>(95% CI) | Spearman<br>Correlation<br>(95% CI) | Raw CCC*<br>(95% CI)   | Calted CCC*<br>(95% CI) | Meet concordance<br>Criteria** |
|---------------------------|-------------------------------------|-------------------------------------|------------------------|-------------------------|--------------------------------|
| <b>D614G</b>              | 0.93 (0.911,<br>0.945)              | 0.92 (0.900,<br>0.944)              | 0.91 (0.885,<br>0.927) | 0.93 (0.909,<br>0.943)  | Yes                            |
| <b>Omicron<br/>(BA.1)</b> | 0.95 (0.931,<br>0.957)              | 0.95 (0.935,<br>0.964)              | 0.85 (0.819,<br>0.875) | 0.94 (0.925,<br>0.953)  | Yes                            |

\*Pearson and CCC are based on log-transformed titers excluding 3 cases having < LLOD

Calted CCC = Calibrated CCC by linear regression approach.

\*\*The predefined concordance criterion is lower bound of the 95% CI for CCC is greater than 0.65.

CCC, concordance correlation coefficient; CI, confidence interval; LLOD, lower limit of detection; SD, standard deviation; ULOQ, upper limit of quantitation.

**Supplementary Table 14: Linear Regression and Deming Regression of PPD (AU/mL) on Duke (ID50) by VOC**

| VOC            | Linear Regression |               | Deming Regression by Wicklin 2019 with lambda = 1 |                      |
|----------------|-------------------|---------------|---------------------------------------------------|----------------------|
|                | Intercept (SE)    | Slope (SE)    | Intercept (95% CI)                                | Slope (95% CI)       |
| D614G          | -0.095 (0.087)    | 0.993 (0.025) | -0.371 (-0.560, -0.182)                           | 1.073 (1.019, 1.127) |
| Omicron (BA.1) | -0.103 (0.066)    | 1.156 (0.025) | -0.303 (-0.419, -0.188)                           | 1.235 (1.186, 1.284) |

**Supplementary Fig. 36. Scatter Plots of Duke (ID50) and PPD (AU/mL) Assays by VOC with and without Calibration\* (N = 250)**

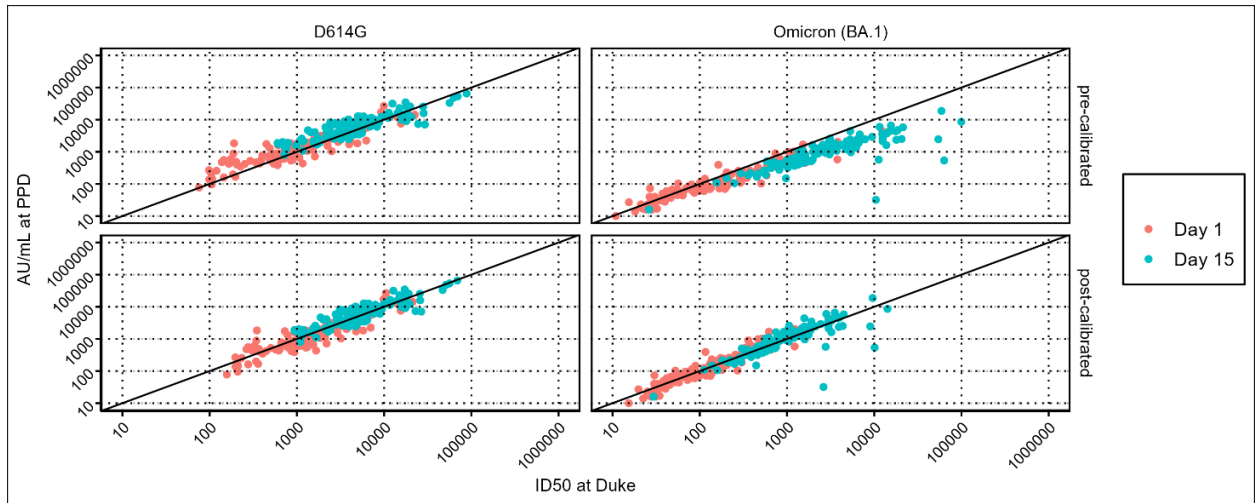

**Supplementary Fig. 37. Violin Plots of Duke (ID50) and PPD (AU/mL) Assays by VOC with and without Calibration\* (N = 250)**

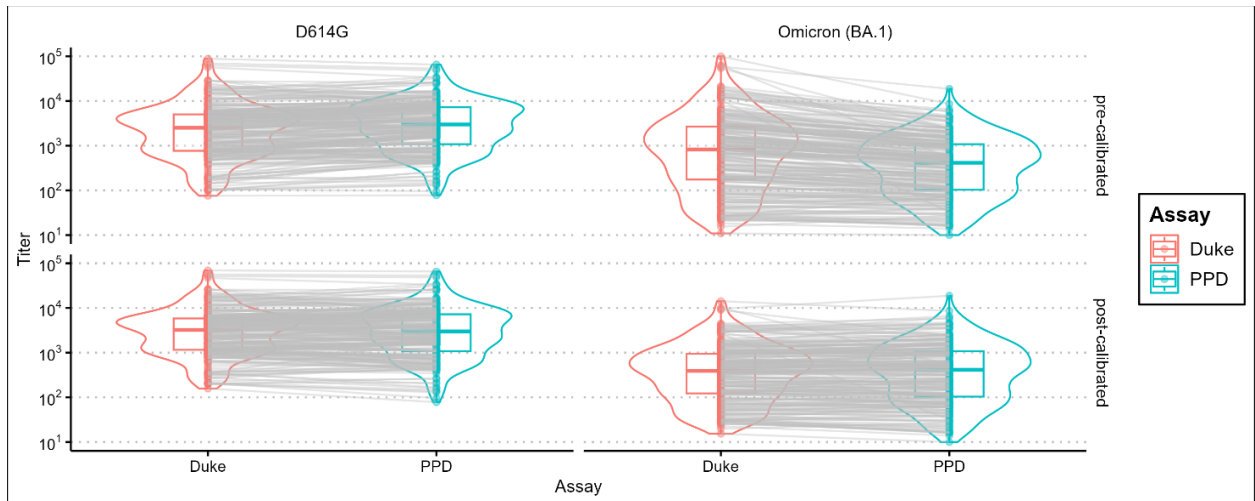

\*The data was calibrated using linear regression approach, see Supplementary Table 14 for the calibration equation parameters. Only samples with titers above the lower limit of detection (LLOD) from both laboratories are included in plots and above ULOQ values were changed to be equal to ULOQ. VOC: Variant of concern.

## Supplementary Table 15. Glossary of Terms, Abbreviations, and Acronyms

| Term                                   | Definition/Explanation/Further Information                                                                                                                                                                                                                                                                                                |
|----------------------------------------|-------------------------------------------------------------------------------------------------------------------------------------------------------------------------------------------------------------------------------------------------------------------------------------------------------------------------------------------|
| AU                                     | Arbitrary units, i.e., assay readouts that are not calibrated to any standard or scale.                                                                                                                                                                                                                                                   |
| bAb                                    | Binding antibodies                                                                                                                                                                                                                                                                                                                        |
| BD1                                    | Booster Dose 1 = the day on which the third (booster) dose of mRNA-1273 was administered. See Supplementary Fig. 1.                                                                                                                                                                                                                       |
| BD29                                   | Booster Dose 29 = 28 days (allowable window: 19 to 45 days) post-administration of third (booster) dose. See Supplementary Figs. 1, 2.                                                                                                                                                                                                    |
| CoP                                    | Correlate of Protection = an immune marker that statistically associates with post-vaccination protection against a given clinical endpoint. May or may not be a mechanistic CoP. A validated CoP can expedite decisions on vaccine approval and use and hence is highly sought. Further reading on CoPs: refs. <sup>1-4</sup>            |
| CoR                                    | Correlate of Risk = an immune marker that statistically associates with the incidence of a given clinical endpoint in the population of interest receiving a regimen. <sup>5,6</sup> Assessment of CoRs is a first step in identifying a correlate of protection (CoP).                                                                   |
| Correlate of booster relative efficacy | Given crossover of the original placebo arm, correlates could not be assessed against a placebo group. The correlate of booster relative efficacy analyses therefore contrast the hazard of Omicron COVID-19 in three-dose vaccine to that in two-dose vaccine recipients.                                                                |
| DD1                                    | Disease Day 1 = Date of Omicron COVID-19 endpoint diagnosis. See Supplementary Fig. 1.                                                                                                                                                                                                                                                    |
| IU                                     | International Units for neutralizing antibody titer. Ancestral nAb titer readouts can be calibrated to the WHO 20/136 International Standard <sup>7</sup> to express in IU (for 50% inhibitory dilution nAb titers, this is IU50/ml) as detailed in the Supplementary Material of Gilbert et al. <sup>8</sup>                             |
| LLOQ                                   | Lower limit of quantitation. The LLOQ defines the lower readout of the range over which the assay is accurate and precisely quantitates samples.                                                                                                                                                                                          |
| nAb                                    | Neutralizing antibodies. Evidence supporting nAbs as a CoP against symptomatic COVID-19 is summarized in ref. <sup>9</sup>                                                                                                                                                                                                                |
| PDV                                    | Participant decision visit. After issuance of an EUA for the mRNA-1273 vaccine (December 2020), the COVE protocol was amended to include an open-label phase. At the PDV, participants were informed of their original treatment assignment and those in the placebo group were offered the opportunity to receive mRNA-1273.             |
| Predicted-at-exposure antibody level   | To estimate Ab levels at each day post peak, paired antibody measurements on BD1 and DD1 were used to calculate the slope of antibody waning for each participant. The median slope was used to predict antibody levels at each following day, for each participant with BD29 measurement, using the formula described in Methods. The Ab |

## Surrogate endpoint

level at each following day was then associated with the COVID-19 hazard using a calendar time-based Cox model.

A validated CoP can be used as a surrogate endpoint for a clinical outcome of interest and thus be used as a primary endpoint for vaccine authorization or approval. The use of a surrogate endpoint can thus circumvent resource-intensive randomized, controlled phase 3 trials. Example applications could include serving as a basis for approval of a vaccine in populations not included in the original phase 3 trial (e.g. children,<sup>10</sup> the elderly) or for approving e.g. variant-adapted versions.

## Supplementary References

- 1 Gilbert, P. B. *et al.* Four statistical frameworks for assessing an immune correlate of protection (surrogate endpoint) from a randomized, controlled, vaccine efficacy trial. *Vaccine* **42**, 2181-2190, doi:10.1016/j.vaccine.2024.02.071 (2024).
- 2 Plotkin, S. A. Correlates of protection induced by vaccination. *Clin Vaccine Immunol* **17**, 1055-1065, doi:10.1128/CVI.00131-10 (2010).
- 3 Plotkin, S. A. & Gilbert, P. B. Nomenclature for immune correlates of protection after vaccination. *Clin Infect Dis* **54**, 1615-1617, doi:10.1093/cid/cis238 (2012).
- 4 Plotkin, S. A. & Gilbert, P. B. Correlates of Protection. In: *Vaccines*, Eighth Edition, Editors Walter Orenstein, Paul Offit, Kathryn Edwards, Stanley Plotkin. Pages 35-40. Elsevier Inc., New York. (2022).
- 5 Qin, L., Gilbert, P. B., Corey, L., McElrath, M. J. & Self, S. G. A framework for assessing immunological correlates of protection in vaccine trials. *J Infect Dis* **196**, 1304-1312, doi:10.1086/522428 (2007).
- 6 Gilbert, P. B., Qin, L. & Self, S. G. Evaluating a surrogate endpoint at three levels, with application to vaccine development. *Stat Med* **27**, 4758-4778, doi:10.1002/sim.3122 (2008).
- 7 National Institute for Biological Standards and Control (NIBSC). Instructions for use of First WHO International Standard for anti-SARS-CoV-2 Immunoglobulin (Version 3.0, Dated 17/12/2020) NIBSC code: 20/136 [https://www.nibsc.org/science\\_and\\_research/idd/cfar/covid-19\\_reagents.aspx](https://www.nibsc.org/science_and_research/idd/cfar/covid-19_reagents.aspx) Access date Jul 29, 2021.
- 8 Gilbert, P. B. *et al.* Immune correlates analysis of the mRNA-1273 COVID-19 vaccine efficacy clinical trial. *Science* **375**, 43-50, doi:10.1126/science.abm3425 (2022).
- 9 Gilbert, P. B. *et al.* A Covid-19 Milestone Attained — A Correlate of Protection for Vaccines. *New England Journal of Medicine* **387**, 2203-2206 (2022).
- 10 Fleming-Dutra, K. E. Interim recommendations of the Advisory Committee on Immunization Practices for use of Moderna and Pfizer-BioNTech COVID-19 vaccines in children aged 6 months–5 years—United States, June 2022. *MMWR. Morbidity and Mortality Weekly Report* **71** (2022).



**Statistical Analysis Plan for Study of Post Dose 3 and  
Exposure-Proximal Omicron Antibody as Immune  
Correlates for Omicron COVID-19 in the P301 COVE  
Study**

USG COVID-19 Response Team / Coronavirus Prevention Network  
(CoVPN) Biostatistics Team

October 15, 2023

# Contents

|                                                                                                                                         |           |
|-----------------------------------------------------------------------------------------------------------------------------------------|-----------|
| <b>List of Tables</b>                                                                                                                   | <b>3</b>  |
| <b>List of Figures</b>                                                                                                                  | <b>4</b>  |
| <b>1 Outline</b>                                                                                                                        | <b>5</b>  |
| <b>2 Stage 1 correlates sampling design</b>                                                                                             | <b>5</b>  |
| <b>3 Objectives of this post booster dose Omicron correlates study</b>                                                                  | <b>5</b>  |
| <b>4 Stage 2 sampling design for addressing the objectives</b>                                                                          | <b>6</b>  |
| <b>5 Statistical analysis plan by objectives</b>                                                                                        | <b>7</b>  |
| 5.1 Descriptive statistics . . . . .                                                                                                    | 7         |
| 5.2 Details on planned figures and tables for the first manuscript . . . . .                                                            | 14        |
| 5.3 Assessing Objectives 1–4 ( $\approx$ peak Ab and pre-booster Correlates of Risk) . . . . .                                          | 15        |
| 5.3.1 Covariates adjusted for in CoR and CoP analyses . . . . .                                                                         | 16        |
| 5.3.2 Machine learning analysis to estimate best models for predicting COVID-19 .                                                       | 16        |
| 5.4 Assessing Objectives 5 and 6 ( $\approx$ peak Ab as controlled risk Correlates of Protection)                                       | 18        |
| 5.4.1 Primary controlled risk CoP analysis . . . . .                                                                                    | 18        |
| 5.4.2 Exploratory controlled CoP analysis . . . . .                                                                                     | 19        |
| 5.5 Controlled VE CoP analysis of Objectives 5 and 6 based on boosted vs. not-yet<br>boosted . . . . .                                  | 20        |
| 5.6 Assessing Objectives 7-9 (Exposure-Proximal Correlates of Risk and Correlates of<br>Protection) . . . . .                           | 21        |
| 5.7 Addressing Objective 10 on mediation of the effect of dose 2 to 3 interval on COVID-<br>19 mediated through BD29 antibody . . . . . | 22        |
| <b>6 Specifications for general issues faced for most analyses</b>                                                                      | <b>22</b> |
| 6.1 Computation of inverse probability of sampling weights . . . . .                                                                    | 22        |
| 6.2 Imputation of demographics variables for stratification and merging of sparse strata<br>for weights computation . . . . .           | 23        |
| <b>7 Additional data analysis issues</b>                                                                                                | <b>23</b> |
| 7.1 Exclude participants reporting being HIV positive from the correlates analysis . . .                                                | 23        |
| 7.2 Missing lineages . . . . .                                                                                                          | 23        |

## List of Tables

|   |                                                                                                                                     |   |
|---|-------------------------------------------------------------------------------------------------------------------------------------|---|
| 1 | Stratified sampling design for measuring Omicron antibody at (BD1, BD29) for non-cases and at (BD1, BD29, DD1) for cases* . . . . . | 8 |
|---|-------------------------------------------------------------------------------------------------------------------------------------|---|

## List of Figures

- 1 Flow-chart of the stage 2 correlates study that evaluates Omicron antibody as a correlates of risk and of protection of Omicron COVID-19. . . . . 7

## 1 Outline

First, this document recapitulates the sampling design that was used for assessment of Stage 1 correlates (Gilbert et al., 2022b). Second, it states the study objectives to assess post dose 3 Omicron BA.1 antibody titer, and exposure-proximal antibody titer, as immune correlates for Omicron COVID-19. Third, it describes the sampling plan for enabling the immune correlates statistical analyses. Fourth, it specifies the statistical analysis plan that details how to assess each objective.

Three assays VAC62, VAC122, VAC123 have been selected for this study:

VAC62– PsVNA against ancestral D614G strain (PPD Vaccines)

VAC122– PsVNA against BA.1 (B.1.529) VAC122 (PPD Vaccines)

VAC123– MSD multiplex: S, RBD, N +S (D614, Gamma, Alpha, Beta, Delta AY4, Omicron BA.1) (PPD Vaccines)

## 2 Stage 1 correlates sampling design

A two-phase stratified case-cohort sampling design was applied for measuring D1, 29, 57 antibody levels after the two-dose primary series in per-protocol participants sampled into the immunogenicity subcohort and for all baseline negative per-protocol vaccine recipient COVID-19 endpoint cases occurring at least 7 days post D29 visit or at least 7 days post D57 visit. The implemented sampling design is described in the Supplementary Material of Gilbert et al. (2022b). The sampling design sought balanced numbers of baseline negative per-protocol participants in each of the six demographic strata defined by (Minority, Non-Minority)  $\times$  (Age  $\geq$  65, Age  $<$  65 and ‘at risk’, Age  $<$  65 and Not ‘at risk’), within each of the naïve and non-naïve populations. For sampling of non-cases for Stage 2 correlates, balance in these factors will also be pursued.

## 3 Objectives of this post booster dose Omicron correlates study

The following objectives are assessed separately in SAR-CoV-2 naïve and SAR-CoV-2 non-naïve individuals, as defined below. The study endpoint for all objectives is adjudicated “Omicron COVID-19” counted starting 7 days after the post-booster Day 29 (BD29) visit and starting December 1, 2021 or later. For Objectives 7 and 9, “instantaneous Omicron COVID-19” refers to the instantaneous hazard rate of Omicron COVID-19, i.e., the rate of Omicron COVID-19 over the next day of follow-up. The objectives are assessed primarily for two BA.1 markers: bAb to Spike BA.1 in the MSD multiplex (VAC123), and pseudovirus nAb-ID50 titer to BA.1 (VAC122), based on assays at PPD. In addition, some of the objectives will be repeated for the same markers measured against D614 (binding assay) or D614G (pseudovirus neutralization) instead of against BA.1.

### Objectives

1. To assess BD29 Omicron Ab as a correlate of risk (CoR) against Omicron COVID-19
2. To assess fold-rise in Omicron Ab from BD1/pre-booster to BD29 as a CoR against Omicron COVID-19

3. To assess whether the CoR in 1. or 2. is modified by SARS-CoV-2 naïve/non-naïve status
4. To assess whether the CoR in 1. is modified by the BD1 antibody value
5. To assess BD29 Omicron Ab as a correlate of protection (CoP) against Omicron COVID-19
6. To assess fold-rise in Omicron Ab from BD1 to BD29 as a CoP against Omicron COVID-19
7. To assess Omicron Ab as an exposure-proximal CoR of instantaneous Omicron COVID-19
8. To assess whether the exposure-proximal CoR in 7. is modified by the BD1 antibody value
9. To assess Omicron Ab as an exposure-proximal CoP against instantaneous Omicron COVID-19
10. To assess mediation of the effect of the interval between dose 2 and dose 3 on Omicron COVID-19 through BD29 Omicron Ab value

## 4 Stage 2 sampling design for addressing the objectives

Figure 1 shows the blood sampling schedule that enables the correlates studies. This correlates study is a stratified case-control study of post-dose 3 Omicron Ab in 3-dose vaccine recipients. The sampling approach samples Omicron COVID-19 endpoint cases starting 7 days after BD29 from each of the original vaccine and cross-over vaccine arms. Sampling stratified by randomization arm creates useful variability in the time between the two-dose vaccination series and the booster dose. The primary study endpoint is Omicron COVID-19 occurring at least 7 days post dose 3 Ab measurement at BD29 through to the data base lock in May, 2022. The sampling is done separately in the “naïve” cohort with no evidence of SARS-CoV-2 infection from enrollment through to BD1 and in the “non-naïve” cohort with any evidence of SARS-CoV-2 infection from  $\geq 14$  days after the second dose of mRNA-1273 vaccine through to BD1. Here, prior infection is defined inclusively based on any results of previous RT-PCR+, N-seroconversion, or a symptomatic COVID-19 endpoint with positive confirmatory testing. Stratifying the sampling by naïve/non-naïve status enables study of immune correlates in each of the naïve and non-naïve cohorts given the importance of understanding immune correlates in non-naïve populations as well as in naïve populations, and addressing whether and how prior infection modifies immune correlates (Objective 3). Figure 1 shows the schema of blood sample storage for potential antibody measurement in the COVE study.

The sample size of the correlates study in terms of participants with new antibody measurements is as follows:

1. Stratified random sample of  $N=256$  three-dose vaccine recipients
2. 640 total samples/assays (Omicron BA.1 Ab measured at BD1, BD29 for all participants, and also at disease-day-one (DD1) that is the date of COVID-19 endpoint diagnosis for all cases)

Each of the correlates studies (in naïve and non-naïve individuals) is based on 64 vaccine cases with antibody data; in comparison  $\approx$ peak Ab correlates were defined based on 36 vaccine cases in the Stage 1 correlates analyses ([Gilbert et al., 2022b](#)) and exposure-proximal correlates were defined

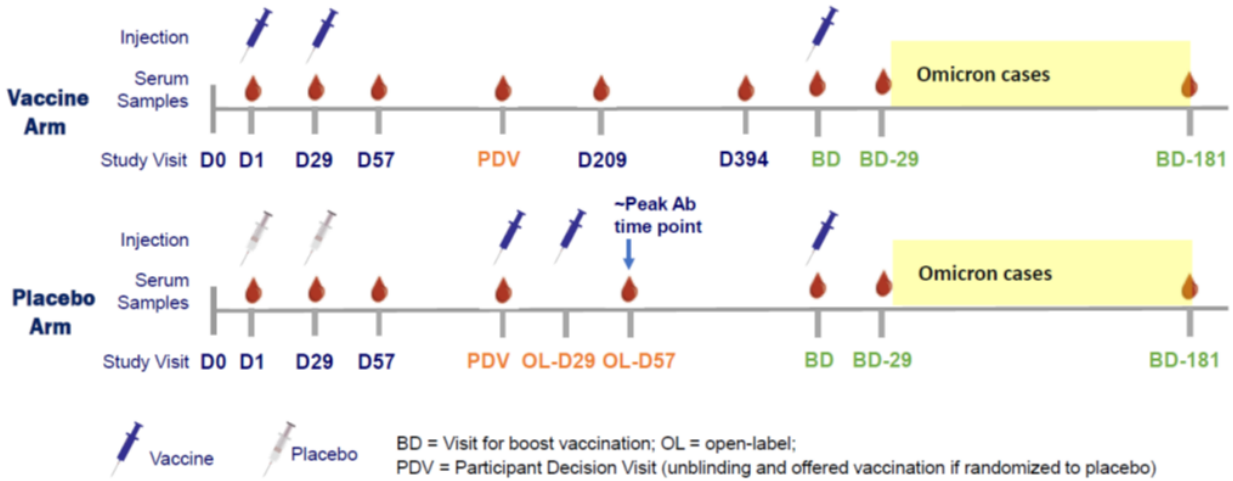

Figure 1: Flow-chart of the stage 2 correlates study that evaluates Omicron antibody as a correlates of risk and of protection of Omicron COVID-19.

based on 39 vaccine cases for an observational study of Pfizer’s mRNA vaccine (Bergwerk et al., 2021).

Table 1 presents the sampling strata, where for eligibility participants must qualify per-protocol during the original follow-up period, received the first booster dose, have blood samples at BD1 and BD29, and cases are also required to have DD1 sample availability. Appendix A provides complete details of the Stage 2 sampling design that includes a prioritization of sampling of eligible participants and a dependency of sampling on demographic factors, which allows computation of inverse probability of sampling weights for all participants included in the correlates study.

For peak time correlates analyses of BD29 markers, in addition to requiring cases to have failure time starting 7 days after BD29 for inclusion, it is also required that the time interval between BD1 and BD29 falls in 19 to 45 days; otherwise the case is excluded from analysis.

## 5 Statistical analysis plan by objectives

### 5.1 Descriptive statistics

Tables of immunogenicity will be reported separately by assay, which amounts to the following variables:

1.  $\log_{10}$  nAb titer to D614G
2.  $\log_{10}$  nAb titer to BA.1
3.  $\log_{10}$  anti-Spike IgG to D614

Table 1: Stratified sampling design for measuring Omicron antibody at (BD1, BD29) for non-cases and at (BD1, BD29, DD1) for cases\*

|                           | Boosted          |     | Boosted          |     | Boosted  |     | Boosted  |     | Total<br>(Samples) |
|---------------------------|------------------|-----|------------------|-----|----------|-----|----------|-----|--------------------|
|                           | Sep23-Oct15 2021 |     | Oct16-Oct31 2021 |     | Nov 2021 |     | Dec 2021 |     |                    |
| Original Vx Omicron case  | 8N               | 8NN | 8N               | 8NN | 8N       | 8NN | 8N       | 8NN | 64 (192)           |
| Original Vx non-case      | 8N               | 8NN | 8N               | 8NN | 8N       | 8NN | 8N       | 8NN | 64 (192)           |
| Crossover Vx Omicron case | 8N               | 8NN | 8N               | 8NN | 8N       | 8NN | 8N       | 8NN | 64 (192)           |
| Crossover Vx non-case     | 8N               | 8NN | 8N               | 8NN | 8N       | 8NN | 8N       | 8NN | 64 (192)           |

\*Case = COVID-19 endpoint in the interval [ $\geq 7$  days post BD29 AND  $\geq$  Dec 1 2021, May 2022 data base lock date]. As described in the appendix the COVID-19 endpoint is documented to be Omicron BA.1 if possible whereas for some non-naïve COVID-19 endpoints there was not lineage data available to document the case to be Omicron BA.1.

Non-case = Did not acquire COVID-19 (of any strain) in the interval [BD1, data base lock date].

naïve = No evidence of SARS-CoV-2 infection from enrollment through to BD1;

Non-naïve = Any evidence of SARS-CoV-2 infection in the interval [ $\geq 14$  days after the second dose of mRNA-1273, BD1], operationalized as a COVID-19 endpoint or seroconversion from a blood sample up to the BD1 visit (evidence of infection by RNA PCR from a BD1 sample was not included as a qualifier for the Non-naïve group).

4.  $\log_{10}$  anti-Spike IgG to Gamma
5.  $\log_{10}$  anti-Spike to Alpha
6.  $\log_{10}$  anti-Spike to Beta
7.  $\log_{10}$  anti-Spike to Delta AY4
8.  $\log_{10}$  anti-Spike to BA.1
9.  $\log_{10}$  anti-RBD IgG to D614

Note that while descriptives are provided for all of the assay variables, the correlates analyses focus on four assay variables:  $\log_{10}$  nAb ID50 titer to D614G,  $\log_{10}$  nAb ID50 titer to BA.1, anti-Spike IgG to D614, and anti-Spike IgG to BA.1.

Inverse-probability weighting will be used in summarizing immunogenicity in order that estimates and inferences are for the population from which the whole study cohort was drawn. This whole population and the sample weights are defined in Section 6.1.

#### **Assay readouts accounting for assay limits (before multiplying the readouts by constants)**

The antibody markers have readouts in units defined by PPD reports, and the readouts account for the LOD, LLOQ, ULOQ assay limits derived by PPD for each assay.

The readout for the analysis of the two nAb ID50 titer markers is serum antibody concentration Ab[C], with labeling for plots “ID50 (AU/ml).” For D614G, the LLOQ for Ab[C] is 10 AU/ml. For D614G the ULOQ for Ab[C] is 281,600 AU/ml. Values  $>$  ULOQ are assigned ULOQ. These LLOQs and ULOQs were derived for the D614G antigen in the PPD assay report “PPD Project



ID: RPJX. Assessment of Equivalency of Neutralization Antibodies Between the PPD VSDVAC 62 Microneutralization Assay and Historical ID50 Results Provided by Moderna That Were Generated Using the Duke Microneutralization Assay and the D614G Microneutralization Assay Version 1.0.” PPD amended the ULOQ of 281,600 AU/ml based on FDA feedback that precision, relative accuracy and dilutional linearity of the SARS CoV-2 MN assay as well as ULOQ for the assay be based on the highest measurable sample that shows acceptable precision and accuracy.

For the Omicron BA.1 antigen, the PPD assay report “PPD Project Code: RVUJ2. Validation of A Microneutralization Assay for the Detection of SARS CoV-2 Neutralizing Antibodies (SARS CoV-2-NAb) for the Omicron Spike BA.1 Variant in Human Serum (SARS CoV-2 MN O) Version 1.0” yielded the LLOQ for Ab[C] of 8 AU/ml and a ULOQ of 24,503 AU/ml. Values > ULOQ are assigned ULOQ.

The LLOQ for PsV nAb ID50 is 10 for D614G and 8 for BA.1, respectively. PsV nAb ID50 D614G values below LLOQ = 10 are assigned the value of LLOQ/2 = 5 and PsV nAb ID50 BA.1 values below LLOQ = 8 are assigned the value of LLOQ/2 = 4.

### **Multiplying nAb ID50 titer assay readouts by constants to place readouts on a comparable scale to units used in the previous immune correlates publications for Moderna COVE**

The PPD assay report RPJX cited above showed that Ab[C] is on the same AU/ml scale as the Duke ID50 titer readout with no need for multiplying Ab[C] by a constant, that is, analyses would be acceptable if they treat Ab[C] to have the same unitage as the Duke ID50 biomarker. That report estimated a scaling factor of 1.04 between the PPD Ab[C] readout and the Duke ID50 readout, and therefore we do apply this scaling factor, even though it has little impact.

In addition, we multiply PPD Ab[C] readouts by 0.242, which was the conversion factor used by Duke to convert their ID50 readouts to the IU50/ml scale. It might seem better to divide the PPD Ab[C] readouts by 1.275, as this was the conversion factor estimated by PPD in its calibration report “PPD Project Code: RQHQ. Calibration of the V62RS-X132-CVMN Reference Standard Used in the SARS CoV-2 Neutralizing Antibodies (SARS CoV-2-Nab) in Human Serum (SARS CoV-2 MN) Method to the WHO International Standard for anti-SARS-CoV-2 Immunoglobulin Lot 20/136 Version 1.0.” However, to meet our greater objective to be able to compare readouts to those previously used in the blinded-phase Moderna COVE correlates studies ([Gilbert et al., 2022b](#); [Benkeser et al., 2023](#)), we apply the Duke conversion factor. This means we can interpret anti-D614G ID50 titer readouts at BD1 and BD29 in the current correlates study on an apples vs. apples scale compared to the readouts used in the previous correlates studies. A section in the Supplemental Material of the booster correlates manuscript will explain the reasoning of this choice in greater detail. In sum, the original PPD Ab[C] ID50 readouts received from PPD are multiplied by 0.242 and then they are divided by 1.04, to constitute the reported ID50 (AU/ml) readouts. Then, the PPD anti-BA.1 Ab[C] ID50 readouts received from PPD are also multiplied by 0.242 and then they are divided by 1.04, for placing the readouts on a comparable scale to readouts against the D614G strain. Statistical reports are generated both using the un-scaled PPD assay units for each of D614G ID50 and BA.1 ID50, as well as using the scaled units for each of D614G ID50 and BA.1 ID50 (multiplying un-scaled readouts by 0.242/1.04).

In addition, it is of interest to consider D614G ID50 readouts scaled to be predicted ID50 values against BA.1; the advantage of doing this is the anchoring to the Duke/PPD D614G assay concordance study, as the Duke/PPD BA.1 concordance study is still ongoing. Based on data from the Duke assay on 26 3-dose mRNA-1273 participants, the geometric mean ratio of ID50 readouts to BA.1 vs. to D614G was 0.225. Therefore, it is of interest to scale D614G readouts by multiplying them by 0.225, which gives the readouts interpretations in terms of predicted ID50 against BA.1. Multiplying original PPD D614G ID50 units by  $(0.242/1.04)*0.225 = 0.052$  creates the Predicted BA.1 units that can be quantitatively interpreted in comparison to the anti-D614G IU50/ml units, where for example a result of Predicted BA.1 ID50 is 2-fold lower than D614G IU50/ml can be properly interpreted as 2-fold lower titer against BA.1 than against D614G. The following data analysis will be included:

The blinded phase correlates study (Gilbert et al. 2022) estimated how two-dose vs. placebo vaccine efficacy varied by D614G nAb ID50 titer at 4 weeks post dose 2, with ID50 titer calibrated to the WHO 20/136 International Standard and reported in IU50/ml units. It is of interest to compare this ancestral antibody, ancestral COVID-19 vaccine efficacy curve with the BA.1 antibody, Omicron BA.1 COVID-19 booster vaccine efficacy curve, to ascertain whether a different amount of variant-matched antibody is needed for high-level booster protection than for high-level two dose vs. placebo protection. To do this, we defined a Predicted BA.1 ID50 biomarker at BD29 scaled such that it can be absolutely quantitatively interpreted vs. D614G IU50/ml units. This scaling was accomplished in two steps. First, the Duke/PPD D614G assay concordance study (BARDA, 2021) and the Duke assay International Standard calibration study (Huang et al., 2021) showed that multiplying D614G PPD nAb ID50 readouts by  $(0.242/1.04)$  transforms units to the IU50/ml scale previously used (Gilbert et al., 2022c). Second, based on data from 26 three-dose mRNA-1273 participants with Duke assay ID50 measured 4 weeks post dose 3 against both D614G and BA.1, the geometric mean ratio of ID50 against BA.1 vs. against D614G was 0.225 (Lyke et al., 2022; Atmar et al., 2022). Therefore, we multiplied the PPD D614G nAb IU50/ml values by 0.225, attaining the Predicted BA.1 ID50 values (thus original PPD BA.1 ID50 units are multiplied by  $(0.242/1.04)*0.225 = 0.052$  to generate Predicted BA.1 ID50 units). The BD29 booster vaccine efficacy curve analysis was repeated for this biomarker, and results overlaid with the original Day 57 vaccine efficacy curve analysis, providing a means for absolute comparison of variant-matched titer levels associated with efficacy.

Note that for plotting labeling, IU50/ml and BAU/ml labeling is never used, because antibody responses to BA.1 are of primary interest, and international units do not exist for these readouts. For the responses against D614G or D614 the readouts indeed are in international units IU50/ml and BAU/ml; however, for consistency with BA.1 readouts plotting labels AU/ml are used, and footnotes of captions note that these units equate to international units.

The assay limits for the PPD VAC123 MSD multiplex assay are listed below. In particular, the LLOQs are taken as the LLOQs for the lowest dilution 1:500, and are as follows by antigen:

- Spike D614: 69
- B.1.1.529/BA.1: 102
- B.1.617.2/Delta: 150

- P.1/Gamma: 143
- B.1.1.7/Alpha: 52
- B.1.351/Beta: 111
- RBD D614: 79

In addition, the ULOQs are taken as the ULOQs for the highest dilution 1:500,000, and are as follows by antigen:

- Spike D614: 14,400,000
- B.1.1.529/BA.1: 1,180,000
- B.1.617.2/Delta: 8,000,000
- P.1/Gamma: 5,800,000
- B.1.1.7/Alpha: 8,800,000
- B.1.351/Beta: 5,000,000
- RBD D614: 5,800,000

The LLOQ for bAb Spike is 69 AU/ml for D614 and 102 AU/ml for BA.1. bAb spike D614 readouts below LLOQ = 69 AU/ml are assigned the value LLOQ/2 = 34.5 AU/ml, and bAb spike BA.1 readouts below LLOQ = 102 AU/ml are assigned the value LLOQ/2 = 51 AU/ml.

Reporting units for MSD binding antibody readouts in tables and figures are AU/ml. PPD did not develop a conversion factor from AU/mL to International Units (BAU/ml) for any of the MSD assays. There is no equivalency study of the PPD VAC123 MSD assay compared to the VRC MSD assay that was used in the first correlates study [Gilbert et al. \(2022b\)](#).

### **Definition of participants with a positive response**

- Participants with a positive (quantifiable) pseudovirus neutralization response at each pre-defined timepoint are defined as participants who had ID50 value at the time point greater than or equal to the antigen-specific LLOQ; otherwise the response is not detectable. This definition is the same for both nAb D614G and nAb BA.1.
- Participants with a positive antigen-specific binding antibody response at each pre-defined timepoint are defined as participants who had a antigen-specific bAb measurement at the time point greater than or equal to the antigen-specific LLOQ (specified above); otherwise the response is negative.

### **Tabular output**

- Average duration of follow-up post BD29 for cases and non-cases, stratified by naïve/non-naïve status
- Number (%) positive responses (including denominator that is the estimated number of participants in the population in the cell) with 95% CI at each time point (columns) by original randomization arm x case-control status x naïve/non-naïve status (rows). 95% CI calculated

based on Clopper-Pearson method. Table pools participants over the four boosting intervals listed in Table 1. The time points are BD1, BD29, and disease-day 1 (DD1) (only cases are included for DD1).

- Number (%) positive responses with 95% CI at BD1 by boosting interval (columns) and original randomization arm x case-control status x naïve/non-naïve status (rows). 95% CI calculated based on Clopper-Pearson method.
- Number (%) positive responses with 95% CI at BD29 by boosting interval (columns) and original randomization arm x case-control status x naïve/non-naïve status (rows). 95% CI calculated based on Clopper-Pearson method.
- Number (%) positive responses with 95% CI at DD1 by boosting interval (columns) and original randomization arm x case-control status x naïve/non-naïve status (rows). 95% CI calculated based on Clopper-Pearson method.
- Geometric mean (95% CI) of quantitative marker at each time point (columns) by original randomization arm x case-control status x naïve/non-naïve status (rows). 95% CIs using the t-distribution approximation of  $\log_{10}$ -transformed marker (base 10 of the logarithm is always used). Table pools participants over boosting interval. The time points are BD1, BD29, and DD1 (only cases are included for DD1).
- Geometric mean (95% CI) of quantitative marker at BD1 by boosting interval (columns) and original randomization arm x case-control status x naïve/non-naïve status (rows). 95% CIs using the t-distribution approximation of log-transformed marker
- Geometric mean (95% CI) of quantitative marker at BD29 by boosting interval (columns) and original randomization arm x case-control status x naïve/non-naïve status (rows). 95% CIs using the t-distribution approximation of log-transformed marker
- Geometric mean (95% CI) of quantitative marker at DD1 by boosting interval (columns) and original randomization arm x case-control status x naïve/non-naïve status (rows). 95% CIs using the t-distribution approximation of log-transformed marker.
- Geometric mean ratio (95% CI) of quantitative marker at BD29 and DD1 time points relative to BD1 time point (columns) by original randomization arm x case-control status x naïve/non-naïve status (rows). (i.e., geometric mean of fold-rise values from BD1 to BD29 and from BD1 to DD1.) 95% CIs using the t-distribution approximation of log-transformed marker at each time point. Table pools participants over boosting interval.
- Geometric mean ratio (95% CI) of quantitative marker at BD29 relative to BD1 time point by boosting interval (columns) and original randomization arm x case-control status x naïve/non-naïve status (rows). 95% CIs using the t-distribution approximation of log-transformed marker.
- Geometric mean ratio (95% CI) of quantitative marker at DD1 relative to BD1 time point by boosting interval (columns) and original randomization arm x case-control status x naïve/non-naïve status (rows). 95% CIs using the t-distribution approximation of log-transformed marker.

- Differences in positive response rates (95% CI) between cases and controls at each time point (columns) by original randomization arm x naïve/non-naïve status (rows). 95% CI the Wilson-Score method without continuity correction (Newcombe, 1998). Table pools participants over boosting interval. The time points are BD1 and BD29.
- Differences in positive response rates (95% CI) between cases and controls at BD1 by boosting interval (columns) and original randomization arm x naïve/non-naïve status (rows). 95% CI the Wilson-Score method without continuity correction (Newcombe, 1998).
- Differences in positive response rates (95% CI) between cases and controls at BD29 by boosting interval (columns) and original randomization arm x naïve/non-naïve status (rows). 95% CI the Wilson-Score method without continuity correction (Newcombe, 1998).
- Geometric mean ratio (95% CI) of quantitative marker between cases and controls at each time point (column) by original randomization arm x naïve/non-naïve status (rows). Table pools participants over boosting interval. The time points are BD1 and BD29.
- Geometric mean ratio (95% CI) of quantitative marker between cases and controls at BD1 by boosting interval (columns) and original randomization arm x naïve/non-naïve status (rows).
- Geometric mean ratio (95% CI) of quantitative marker between cases and controls at BD29 by boosting interval (columns) and original randomization arm x naïve/non-naïve status (rows).

## Graphical Output

*Set 1 plots: BD1 and BD29 Ab distributions by case/non-case and naïve-non-naïve status*

1. BD1 antibody for the 2  $\log_{10}$  nAb ID50 titer markers (to D614G and to BA.1), 8 panels of violin/boxplots defined by 4 rows (cross-classification of original randomization arm with naïve/non-naïve) and 2 columns defined by D614G and BA.1 strain, where within each panel there are side-by-side violin/boxplots for cases and non-cases. These plots pool over the four boosting intervals.
2. Repeat 1. for BD29 antibody
3. Repeat 1. for BD29 - BD1 antibody
4. Repeat 1.-3. for the 2  $\log_{10}$  IgG anti-Spike markers (to D614 and to BA.1)
5. Repeat 1.-3. for the 2  $\log_{10}$  IgG anti-RBD markers (to D614)
6. BD1 antibody for the 6  $\log_{10}$  IgG anti-Spike markers (to D614, Gamma, Alpha, Beta, Delta AY4, BA.1), 24 panels of violin/boxplots defined by 4 rows (cross-classification of original randomization arm with naïve/non-naïve) and 6 columns defined by strain, where within each panel there are side-by-side violin/boxplots for cases and non-cases. These plots pool over boosting intervals.
7. Repeat 7. for BD29 antibody
8. Repeat 7. for BD29 - BD1 antibody

*Set 2 plots: Longitudinal plots BD1 to BD29 (and to DD1)*

1. For  $\log_{10}$  nAb ID50 titer to D614G, for each of 4 rows (cross-classification of original randomization arm with naïve/non-naïve), plot 5 side-by-side violin/box plots, the the first 2 for BD1 non-cases, BD29 non-cases, with lines connecting individual's data points, and the last 3 for BD1 cases, BD29 cases, DD1 cases, with lines connecting individual's data points. To the right of this plot, place the parallel results for  $\log_{10}$  nAb ID50 titer to BA.1. These plots pool over the four boosting intervals.
2. Repeat 1. for  $\log_{10}$  anti-Spike IgG (for D614 and BA.1)
3. Repeat 1. for  $\log_{10}$  anti-RBD IgG (for D614)

*Set 3 plots: Correlation plots across markers at a given time point*

1. For all 15 markers at BD1, a pairs plot similar to those in [Gilbert et al. \(2022b\)](#), pooling over boosting intervals, original randomized arm, case/non-case status, and naïve/non-naïve status. Spearman rank correlation coefficients are included (including IPS weights).
2. Repeat 1. for the 15 markers at BD29
3. Repeat 1. for the 15 difference markers BD29 - BD1 (i.e.,  $\log_{10}$  fold-rise markers)
4. Repeat 1.-3. restricting to the 6 markers of focus as defined in Section 5.1.

*Set 4 plots: Correlation plots for a given marker across time points*

1. For each of the 15 markers, a figure with 8 panels, with 4 rows (cross-classification of original randomization arm with naïve/non-naïve) of pairs plots, pooling over boosting intervals, for the marker measured over the time points BD1 and BD29 for non-cases (column 1) and over BD1, BD29, and DD1 for cases (column 2). Spearman rank correlation coefficients are included.

## 5.2 Details on planned figures and tables for the first manuscript

**Proposed Figure 1 of the manuscript:** Include the nAb ID50 BA.1 marker and the IgG Spike BA.1 marker. 8 panels, 2 rows, 4 columns. Each panel shows the violin plots for BD1 and BD29 marker distributions, with lines connecting the BD1 and BD29 data points so the paired data/fold-rises are visible. The 2 rows are for (1) nAb marker and for (2) IgG Spike (the logic here is the y-axis range can always be the same). The 4 columns are for (1) Naive Omicron Cases; (2) Naive Non-Cases; (3) Non-naive Omicron Cases; (4) Non-naive Non-Cases Plotting symbols distinguish Original-Vaccine and Crossover-Vaccine.

Then a supp figure would do the same thing for nAb ID50 D614G and IgG Spike D614. And 2 other supp figures would do the same thing except replace BD29 marker with Fold-rise marker.

**Proposed Table 1 of the manuscript:** Like Table 1 in the 2022 Science paper, for the same 2 BA.1 markers of Figure 1 (nAb ID50, IgG Spike), focusing only on the BD29 time point, showing BD29 absolute level markers and fold-rise markers as separate rows, and separately for Naive and Non-Naive. So the rows would be (1) Naive, ID50 BA.1, BD29; (2) Naive, IgG Spike BA.1, BD29; (3) Naive, ID50 BA.1, Fold-rise; (4) Naive, IgG Spike BA.1, Fold-rise; (5) Non-Naive, ID50 BA.1,

BD29; (6) Non-Naive, IgG Spike BA.1, BD29; (7) Non-Naive, ID50 BA.1, Fold-rise; (8) Non-Naive, IgG Spike BA.1, Fold-rise.

Then a supp table that is the same except it is for nAb ID50 against D614G and IgG Spike against D614.

**Proposed Figure 2 of the manuscript:** Of the ‘identical’ structure/layout of Figure 2 in the 2022 Science paper, with Panel A for Naive, ID50 BA.1, BD29 and Panel B for Non-Naive, ID50 BA.1, BD29. Panel C would include results for 8 markers, the same 8 listed above for Table 1.

### 5.3 Assessing Objectives 1–4 ( $\approx$ peak Ab and pre-booster Correlates of Risk)

For the CoR Objectives 1–4., the planned analysis is similar to the originally published Stage 1 CoR analysis, implementing baseline-covariate marginalized Cox regression and nonparametric monotone-constrained analysis in the stratified random sample of three-dose vaccine recipients, who were per-protocol during the original follow-up period, received the first booster dose, and have blood samples at BD1, BD29, and also at DD1 for cases. The Cox regression modeling is done using study time to be consistent with what was done originally for COVE; this approach could have reduced precision compared to using calendar time if calendar time predicts COVID-19. If calendar time does strongly predict COVID-19, the analyses may be repeated using the calendar time scale. Cox modeling for CoP objectives uses the calendar time scale (see Section 5.5).

For analyses of markers defined at BD29, the Cox model uses BD29 as the time origin, whereas for analyses of markers defined at BD1, the Cox model uses BD1 as the time origin. Specifically, output for the six analyzed markers listed in Section 5.1 is as follows, where the analyses are done separately for the naïve and non-naïve cohorts, as well as for pooling over the naïve and non-naïve cohorts.

1. (Obj. 1,2) Univariable Cox model results for each quantitative marker (hazard ratio, 95% CI, 2-sided p-value)
2. (Obj. 1,2) Univariable Cox model results for each tertitized marker (hazard ratios, 95% CIs, 2-sided p-values, Generalized Wald p-values)
3. (Obj. 1,2) Univariable Cox model marginalized marker-conditional mean cumulative incidence curves over time through to the last time point  $t_0$ , for Low, Medium, High tertile marker subgroups.
4. (Obj. 1,2) Univariable Cox model marginalized marker-conditional mean cumulative incidence curve over time through to the last time point  $t_0$ , with marker subgroups defined by the continuous value of the marker.
5. (Obj. 1,2) Univariable nonparametric monotonic-regression model (Kenny PhD dissertation) marginalized marker-conditional mean cumulative incidence curve over time through to the last time point  $t_0$ , with marker subgroups defined by the continuous value of the marker.
6. (Obj. 1,2) Multivariable Cox model for the two quantitative markers (anti-Spike IgG to BA.1, nAb ID50 titer to BA.1) (hazard ratios, 95% CIs, 2-sided p-values, generalized Wald test p-value)

7. (Obj. 1,2) Multivariable Cox model for the two tertiled markers (anti-Spike IgG to BA.1, nAb ID50 titer to BA.1) (hazard ratios, 95% CIs, 2-sided p-values, generalized Wald test p-values)
8. (Obj. 3,4) Multivariable Cox model for each of the two quantitative markers including an interaction term for naïve/non-naïve status (Obj. 3, 6) or for the BD1 antibody marker (Obj.4): A Wald p-value for interaction/effect modification is calculated
9. (Obj. 1, 2) Nonparametric threshold TMLE analysis the same as done in [Gilbert et al. \(2022b\)](#) with the method of [Van der Laan and Gilbert \(2022\)](#).

### 5.3.1 Covariates adjusted for in CoR and CoP analyses

The following covariates are adjusted for in all CoR and CoP analyses: baseline behavioral risk score, heightened at-risk indicator, and indicator of White Non-Hispanic (same three variables as adjusted for in [Gilbert et al. \(2022b\)](#)). Analyses pooling over naïve and non-naïve include adjustment for naïve status. Moreover, for the pooled analysis the multivariable superlearning CoR analyses also adjust for the interaction of heightened at-risk indicator with naïve status.

In addition to the baseline covariates  $\mathbf{X}$ , controlled risk CoP analysis that imagines “intervening” on a post-randomization event like BD29 antibody titer will also adjust for covariates measured after baseline but prior to BD29 and are associated with both the BD29 antibody titer and the endpoint; see Section 5.4 for details. Such covariates will include tertiles of BD1 antibody titer. For the analyses that pool over naïve and non-naïve, the analyses also adjust for naïve/non-naïve status. This is done because naïve/non-naïve status is strongly predictive of COVID-19, and likely will also be quite predictive of the BD29 antibody markers, such that it is likely a confounder of the effects of BD29 antibody markers on COVID-19.

The last time point  $t_0$  for analysis is defined taking into account the smallest of the two latest COVID-19 endpoint failure times for naïve and non-naïve individuals, which is similar to as in [Gilbert et al. \(2022b\)](#) except only naïve individuals were studied previously. For the overall analysis of booster vaccine efficacy against Omicron,  $t_0$  was selected as PENDING/TBD days, as the latest time point with reasonable precision in estimation.

### 5.3.2 Machine learning analysis to estimate best models for predicting COVID-19

This analysis will only be pursued if the lower-dimensional CoR analyses of Objectives 1–4 generate substantial signal and motivate a machine-learning multivariable CoR analysis. The analysis will be conducted in the same way as done in [Benkeser et al.](#) for the multivariable Moderna correlates analysis of two-dose vaccine recipients ([Benkeser et al., 2023](#)), except 1) the markers involved and the baseline covariates involved are different and data from all participants are included, 2) to identify interactions between markers, SL.step.interaction will be added to the learner library. These variables are listed below, in the different sets for which a superlearner model is built. Cross-validated area under the ROC curve (CV-AUC) and variable importance analysis will also be conducted in the same way as done in ([Benkeser et al., 2023](#)).

1. Baseline demographics (= variables described in Section 5.3.1) and for analyses pooling over



naive and non-naive also include naive status and the interaction of heightened at-risk indicator with naive status.

2. Possible antibody marker variable sets accounting for assay type (bAb, nAb) where bAb refers to anti-Spike (D614, BA.1), anti-RBD (D614 only), and time point (BD1, BD29, BD29-fold-rise, which includes 2FR and 4FR variables – indicators of two-fold and four-fold rise)

- BD1 bAb all BA.1
- BD29 bAb all BA.1
- BD29-fold-rise bAb all BA.1
- BD1 nAb all BA.1
- BD29 nAb all BA.1
- BD29-fold-rise nAb all BA.1
- BD1 bAb, BD29 bAb all BA.1
- BD1 bAb, BD29-fold-rise bAb all BA.1
- BD29 bAb, BD29-fold-rise bAb all BA.1
- BD1 nAb, BD29 nAb all BA.1
- BD1 nAb, BD29-fold-rise nAb all BA.1
- BD29 nAb, BD29-fold-rise nAb all BA.1
- BD1 (bAb, nAb) all BA.1
- BD29 (bAb, nAb) all BA.1
- BD29-fold-rise (bAb, nAb) all BA.1
- BD1 (bAb, nAb,) BD29 (bAb, nAb) all BA.1
- BD1 (bAb, nAb), BD29-fold-rise (bAb, nAb) all BA.1
- BD29 (bAb, nAb), BD29-fold-rise (bAb, nAb) all BA.1
- Repeat the above 18 sets for all D614 / D614G
- Repeat the above 18 sets for all BA.1 and D614 / D614G

As for other analyses, the analysis is done separately for naïves, non-naïves, and naïves + non-naïves pooled.

## 5.4 Assessing Objectives 5 and 6 ( $\approx$ peak Ab as controlled risk Correlates of Protection)

### 5.4.1 Primary controlled risk CoP analysis

Each of the BD29 and BD29 fold-rise markers is assessed as a controlled risk CoP as defined in [Gilbert et al. \(2022a\)](#), which is based on boosted participants only without a contrast of controlled risk in not-yet-boosted participants. This is analogous to CoR analysis of the vaccine arm only in the original blinded vaccine vs. placebo stage of the trial. This analysis reports E-values for each marker analyzed in tertiles and reports ignorance intervals and 95% estimated uncertainty intervals around the controlled risk curve estimate as a function of continuous immune marker value via the Cox modeling approach, the same as was done in the first Moderna CoP analysis ([Gilbert et al., 2022b](#)). As described in [Gilbert et al. \(2022a, Section 2.1\)](#), the objective of a controlled risk CoP analysis is to estimate the controlled risk parameter that assesses the causal effect of the antibody marker on COVID-19 risk. A controlled risk CoP analysis is different from a controlled vaccine efficacy CoP analysis (see [Section 5.5](#)), whose goal is to contrast participants in the vaccination arm and that in the not-yet-boosted arm.

Our primary interest is to assess the BD29 biomarker as a controlled risk CoP for the population who received the 3rd dose of mRNA-1273 vaccine in the COVE cohort. We will pursue this goal in the naïve and non-naïve populations, separately.

To be more specific, we will study the following causal estimand. Let  $T(Ab1)$  denote the time to Omicron BA.1 COVID-19 after receiving the booster under assignment of all participants to  $BD29 = Ab1$ . For a fixed time  $t_0$  after receiving the booster shot, define

$$r_M(Ab1) := \mathbb{E}_{\mathcal{P}_{\mathbf{L}}}[P(T(BD29 = Ab1) \leq t_0)],$$

where  $\mathbf{L}$  denotes a vector of pre-treatment covariates ('pre-treatment' with respect to BD29) and  $\mathcal{P}_{\mathbf{L}}$  is the distribution of  $\mathbf{L}$  in the "per-protocol" naïve or non-naïve populations who received a booster.

Identification of  $\mathbb{E}_{\mathcal{P}_{\mathbf{L}}}\{P(T(BD29 = Ab1) \leq t_0)\}$  from observed data depends on the ignorability assumption. One version of the ignorability assumption states that the BD29 titer level is independent of potential outcomes  $T(Ab1)$  conditional on baseline covariates  $\mathbf{X}$ , including the minority indicator, high risk indicator and risk score, and covariates collected at BD1, including the matching biomarker level (or its tertiles) at BD1.

Under this ignorability assumption, the quantity  $\mathbb{E}_{\mathcal{P}_{\mathbf{L}}}\{P(T(BD29 = Ab1) \leq t_0)\}$  is identified from observed data via the following g-computation formula ([Gilbert et al., 2022a](#)):

$$r_M(Ab1) := \mathbb{E}_{\mathcal{P}_{\mathbf{L}}}\{P(T(BD29 = Ab1) \leq t_0)\} = \mathbb{E}_{\mathcal{P}_{\mathbf{L}}}\{P(T \leq t_0 \mid BD29 = Ab1, \mathbf{L})\}, \quad (1)$$

where  $\mathbf{L}$  is specified above. To facilitate interpretation, for a fixed BD1 Ab tertile, the controlled risk curve  $r_M(Ab1)$  will be plotted against  $Ab1$  and used to assess the BD29 biomarker of interest as a controlled risk CoP.

Analyses outlined above will be done with BD29 titer replaced by fold-increase from BD1 to BD29 (Objective 6).

### 5.4.2 Exploratory controlled CoP analysis

We may pursue the following exploratory analyses. First, in addition to assessing the controlled risk CoP in the boosted population, we could also assess BD29 as a controlled risk CoP in the COVE trial population. Let  $\mathcal{P}_{\mathbf{X}}$  denote the distribution of baseline covariates  $\mathbf{X}$  in COVE. The parameter of interest would be  $\mathbb{E}_{\mathcal{P}_{\mathbf{X}}}\{P(T(BD29 = Ab1) \leq t_0)\}$ . Identification of  $\mathbb{E}_{\mathcal{P}_{\mathbf{X}}}[P(T(BD29 = Ab1) \leq t_0 | \mathbf{X})]$  from observed data depends on the sequential ignorability assumption; see, e.g., [Joffe and Greene \(2009, Section 2.3\)](#) and [Gilbert et al. \(2022a, Supplementary Material B\)](#). One version of the sequential ignorability assumption states that the BD29 titer level is independent of potential outcomes  $T(Ab1)$  conditional on baseline covariates  $\mathbf{X}$ , tertiles of BD1 marker level, and a person’s naïve/non-naïve status as discussed in the primary controlled risk CoP analysis.

Under this version of sequential ignorability assumption, the quantity  $\mathbb{E}_{\mathcal{P}_{\mathbf{X}}}\{P(T(BD29 = Ab1) \leq t_0 | \mathbf{X})\}$  is identified as follows ([Gilbert et al., 2022a, Supplementary Material B](#)):

$$\begin{aligned} & P(T(BD29 = Ab1) \leq t_0 | \mathbf{X}) \\ = & \sum_{a \in \{l, m, h\}; b \in \{0, 1\}} P(T \leq t_0 | BD29 = Ab1, BD1 = a, \text{Naïve} = b, \mathbf{X}) \times P(BD1 = a, \text{Naïve} = b | \mathbf{X}). \end{aligned} \tag{2}$$

where  $a \in \{l, m, h\}$  denotes the the low, medium and high tertiles of the matching BD1 biomarker. In practice, the conditional probability  $P(BD1 = a, \text{Naïve} = b | \mathbf{X})$  can be estimated via a multinomial regression. Finally, we standardize  $P(T(BD29 = Ab1) \leq t_0 | \mathbf{X})$  to the COVE trial  $\mathcal{P}_{\mathbf{X}}$  and obtain a controlled risk curve.

As a second exploratory analysis, we will study the controlled risk CoP in each randomization arm. Let  $A = 1 = \text{Vaccine}$  if a participant was assigned to the vaccine arm and  $A = 0 = \text{Crossover}$  if assigned to the placebo arm (and later crossed over to the vaccine arm) in the original COVE study; see [Figure 1](#) for an illustration. Let  $T(a, Ab1)$  denote the time to Omicron BA.1 COVID-19 after receiving the booster under assignment of all participants to  $A = a$  and  $BD29 = Ab1$ . For a fixed time  $t_0$  after receiving the booster shot, let  $r_M(a, Ab1) := \mathbb{E}_{\mathcal{P}_{\mathbf{X}}}[P(T(A = a, BD29 = Ab1) \leq t_0 | \mathbf{X})]$ , where  $a = \text{Vaccine}$  or  $\text{Crossover}$ ,  $\mathbf{X}$  denotes a vector of baseline covariates, and  $\mathcal{P}_{\mathbf{X}}$  is the distribution of  $\mathbf{X}$  in the COVE trial population.

Identification of  $\mathbb{E}_{\mathcal{P}_{\mathbf{X}}}[P(T(A = a, BD29 = Ab1) \leq t_0)]$  from observed data depends is analogous to the two-stage g-computation discussed previously. Separate estimates of the curves  $r_M(a, Ab1)$  in  $Ab1$  for each  $a = 0, 1$  will be produced. The contrast  $r_M(\text{Vaccine}, Ab1)/r_M(\text{Crossover}, Ab1)$  will also be reported. This contrast characterizes the “joint effect” of being assigned to the vaccine versus crossover (which had an implication for the interval time and could potentially have an effect on the clinical outcome via a causal pathway not mediated by the BD29 antibody titer) and different levels of BD29 antibody titer.

In a third exploratory analysis, the potential outcome of interest is:

$$T(\Delta, Ab1) := T(\text{receiving booster } \Delta \text{ days after the 2nd vaccine, } BD29 = Ab1).$$

The identification of the controlled risk based on the potential outcome  $T(\Delta, Ab1)$  will be based on a two-stage generalization g-computation discussed previously if the target population is the entire

COVE population and a single-stage g-computation if the population of interest is the boosted population. For selected values of  $\Delta$ , a controlled risk curve could be plotted as a function of BD29 titer level. In addition, controlled vaccine efficacy can be estimated and plotted for two distinct values of  $\Delta$ , e.g., the 10th and 90th percentiles.

Analyses outlined above will be done with BD29 titer replaced by fold-increase from BD1 to BD29 (Objective 6).

### 5.5 Controlled VE CoP analysis of Objectives 5 and 6 based on boosted vs. not-yet boosted

In addition to the controlled risk CoP analysis, for assessing the BD29 antibody marker as a CoP against Omicron COVID-19, another approach measures the booster VE, defined as the hazard rate of COVID-19 for boosted vs. not-yet boosted individuals, or alternatively by the cumulative probability of COVID-19 by a given fixed time point for boosted vs. not-yet boosted individuals. We will study how the booster VE varies as a function of BD29 antibody level Ab1, through the stepped-wedge methodology designed by [Fintzi and Follmann \(2021\)](#).

To be more specific, at any time  $t$ , the risk set would consist of not-infected-by-Omicron participants who are at least 7 days post BD29 and not-yet boosted participants. Each boosted participant is associated with a BD29 antibody level and the hazard rate conditional on the BD29 Ab level,  $\lambda_{\text{boost}}(t, Ab1)$ , will be estimated. On the other hand, the hazard among the not-yet boosted participants,  $\lambda_{\text{not-yet-boost}}(t)$ , will also be estimated. The contrast  $1 - \lambda_{\text{boost}}(t, Ab1)/\lambda_{\text{not-yet-boost}}(t)$  or boost efficacy by Ab1, will be reported and plotted as a function of the BD29 antibody marker Ab1.

An estimate of the overall booster VE against Omicron COVID-19 provides a way to scale the controlled risk curve (marginalized Omicron COVID-19 risk vs. BD29 antibody level Ab1) to be a booster-controlled VE curve; see [Gilbert et al. \(2022d, Section 2.1\)](#) for the distinction between a controlled risk CoP analysis discussed in Section 5.3 and the controlled VE CoP analysis outlined in this section.

The cohort for the CoP analysis will be comprised of everyone who is unboosted as of 1 December 2021, plus the stratified case-control cohort (SCCC). Separate datasets and analyses will be constructed for the non-naive and naive cohorts. An illustrative version of the hazard function for peak antibody CoP analysis is given by

$$h(t) = h_0(t)\exp\{Z_i(t)[\beta_0 + \beta_1 Ab1] + X_i\theta\}w_i(t)I(t \in R_i)$$

where  $R_i$  is defined to remove person  $i$  from the risk set after event, censoring, or the 34 days postboost interval,  $t$  is days since 1 December 2021,  $Z_i(t)$  is 0 before boost and 1 after boost and  $X_i$  is a vector of covariates. The weight  $w_i(t)$  is a little complicated. There are three categories.

1. For those in the SCCC BD cohorts for period 1-3,  $w_i(t)$  is the IPS weight.
2. For those in the SCCC BD period 4 cohort (boosted 1 December 2021 to 31 December 2021),  $w_i(t) = 1$  prior to boosting and is the IPS weight after boosting.

3. For those not in the SCCC and unboosted/prior to boosting on 1 December 2021,  $w_i(t)$  is 1 prior to boosting/COVID-19 event and 0 after boosting or COVID-19 event.

As an alternative, we will avoid weighting by imputing Ab1 in all vaccinees by empirical sampling with replacement from the distribution of BD29 antibody or either cases or controls, as appropriate. This should result in a much reliable estimate of  $\beta_0$ .

The same analysis will be conducted with the BD29 titer replaced by fold-increase from BD1 to BD29 (Objective 6).

### **Repeating correlates analyses in the early period of follow-up in acknowledgment of waning vaccine efficacy**

Several studies have shown that mRNA booster vaccines have waning protection over time, including analysis of the COVE trial itself. Correlates of protection may be strongest and most interpretable during periods of substantial vaccine protection. Therefore, the  $\approx$ peak time point CoR and CoP analyses may be repeated using as the final time point  $t_0 = 91$  days post Day 1 visit. This cut-point of 91 days is chosen in part to harmonize with the COVAIL immune correlates study that also assesses immune correlates restricting to COVID-19 endpoints occurring 91 days post booster. In addition, the immune correlates analyses may also be repeated restricting to COVID-19 endpoints occurring starting 92 days post Day 1 visit through to the final time point  $t_0$  that was selected for the main correlates analyses.

## **5.6 Assessing Objectives 7-9 (Exposure-Proximal Correlates of Risk and Correlates of Protection)**

For assessing antibody as an exposure-proximal CoR (Objective 7), we use the below Cox model

$$h(t) = h_0(t)\exp\{Z_i(t)[\beta_0 + \beta_1 Ab_i(t - b)] + X_i\theta\}w_i(t)I(t \in R_i),$$

where  $t$  is days since 1 December 2021 and  $Ab_i(t - b)$  is the predicted antibody level for person  $i$  at time  $(t - b)$  post boost with other terms as defined in section 5.4. A CoR analysis will draw estimated curves with confidence bands of  $\exp\{\beta_1 Ab\}$  as a function of Ab ranging over the middle 95% of the distribution of predicted Ab. Assessing the Objective 8 will include a term for BD1 dichotomized at the median of the BD1 distribution and an interaction of dichotomized BD1 with  $Ab_i$ . Objective 9 will use the same model and provide CoP curves analogous to the CoR curves using  $1 - \exp(\beta_0 + \beta_1 Ab)$ . Below we describe how we will impute  $Ab(t)$ .

In select cases the BD29 and DD1 antibody readouts will be used to calculate individual slopes using the form  $(BD29-DD1)/d$  where BD29 and DD1 are the antibody readouts and  $d$  the difference in days between BD29 and DD1. Denote the median slope as  $\hat{\theta}$  which will be used to calculate individual antibody decay curves for *all* cases and non-cases using the formula

$$Ab(d) = BD29 + \hat{\theta} \times d,$$

where  $d$  is the number of day post BD29. This imputation will be performed for all individuals in the risk set at all event times. This approach has been applied to the Stage 1 blinded-phase COVE

data, though the slope of decay there was estimated using data from [Doria-Rose et al. \(2021\)](#). Note that even though we have DD1 antibody value for the cases we don't use it in this approach in order to treat cases and controls the same way. It's bad if a covariate is measured one way for cases and another way for controls and the above symmetric imputation avoids this problem. Another reason not to impute DD1 is that the interval between BD29 and DD1 is random, which makes imputation problematic.

If the total variance is large relative to the within person variance, the above regression calibration approach may result in bias and to reduce such bias, an expected partial likelihood estimator may be considered.

The above analyses will be run separately for the naive and non-naive cohorts.

## 5.7 Addressing Objective 10 on mediation of the effect of dose 2 to 3 interval on COVID-19 mediated through BD29 antibody

This question will be analyzed by a new method described in a manuscript under preparation ([Hejazi et al., 2023](#)). The exposure variable of interest  $A$  must be dichotomous, so it will be defined as above vs. below the median number of days between dose 2 and dose 3. The putative mediator to study is BD29  $\log_{10}$  PsV nAb ID50 titer against BA.1, and the outcome is COVID-19, both variables defined the same as for the other  $\approx$ peak antibody correlates objectives. Covariates to adjust for  $W$  will also be the same as used for the other  $\approx$ peak antibody correlates analyses. The analysis will be done with and without  $V$  defined as the BD1  $\log_{10}$  PsV nAb ID50 titer against BA.1. The data set up fits the method of [Hejazi et al. \(2023\)](#) where  $V$  is a likely confounder of the exposure-mediator relationship given that  $V$  predicts both  $A$  and the putative mediator.

The data analysis will be repeated for  $\log_{10}$  PsV nAb ID50 titer against D614G as well as for each of the other markers  $\log_{10}$  anti-Spike BA.1 IgG,  $\log_{10}$  anti-Spike D614, IgG  $\log_{10}$ , and  $\log_{10}$  anti-RBD D614 IgG.

This data analysis is based on a novel statistical method that is still being developed, which will be submitted as part of a statistical methods manuscript. Consequently, the results of this method will likely come later than results from the other analyses, and hence will likely be included in sequel manuscripts rather than in the first correlates manuscript resulting from this SAP.

## 6 Specifications for general issues faced for most analyses

### 6.1 Computation of inverse probability of sampling weights

Define six demographic categories, which were used in the stratified sampling design: Age  $\geq 65$  minority; Age 18-64 'at risk' minority; Age 18-64 'not at risk' minority; Age  $\geq 65$  non-minority; Age 18-64 'at risk' non-minority; Age 18-64 'not at risk' non-minority, i.e., to enrich/over-sample those Age  $\geq 65$ ]. For each sampled participant, the inverse probability sampling weight is computed as numerator / denominator, where the numerator is the total number of per-protocol participants in the participant's cell (among the 32 of [Table 1](#)) that also have membership in the participant's demographic category (among the 6 listed above). The denominator is the total number of participants included in the numerator that were sampled for stage 2 correlates.

## 6.2 Imputation of demographics variables for stratification and merging of sparse strata for weights computation

Wstratum depends upon the demo variables (age, at risk, minority), CalendarBD1Interval, naive, and trt. Controls with missing Wstratum won't be sampled, hence not part of ph1. On the other hand, cases with missing Wstratum are part of ph1 because they may be sampled. If cases have missing demo variables, we want to impute them so that we can assign weights, otherwise it gets too complicated to assign weights to cases. Imputation is performed over all cases and controls without missing demo variables. The latter are included to improve imputation performance. Imputation is performed for demo variables only, but can be enlarged if there are additional variables that provide info on the three demo variables. Due to the limited missingness, a single hard imputation is performed.

When there are strata with empty ph2 sample set, collapsing strata is performed in three steps. First, do it across demo strata within each of 32 sampling buckets. Second, if there are still empty strata, do it across the 4 calendar periods. Specifically, merge a period with the next period if not the last, and merge with the last period with the previous if needed. Third, do it across demo strata within each of 32 sampling buckets one more time because it is possible that collapsing across time periods in step 2 introduced empty demo strata. Assuming that DD1 may not be available for all cases with BD1 and BD29 markers, we will compute a different set of weights for DD1, which may be used for, e.g. computing positive response rates at DD1. We will first attempt to compute weights for DD1 using the Wstratum derived for computing BD29 weights. If it turns out that there are empty cells, we will re-collapse sampling strata to compute weights for DD1.

## 7 Additional data analysis issues

### 7.1 Exclude participants reporting being HIV positive from the correlates analysis

Because the lentivirus-based pseudovirus neutralization assay uses an HIV backbone, the presence of anti-retroviral drugs in serum can give a false positive neutralization signal. For this reason, the original immune correlates analysis [Gilbert et al. \(2022b\)](#) excluded participants who self-reported being HIV positive, because they would likely be taking anti-retroviral drugs. Consistent with the previous correlates analysis, this SAP also excludes participants who self-reported being HIV positive.

### 7.2 Missing lineages

Some endpoint cases will likely have missing lineage/spike sequence. If the COVID-19 endpoint diagnosis date is  $\geq$  January 15, 2022, then the lineage will be hard-imputed to be Omicron BA.1. If the COVID-19 diagnosis date is less than January 15, 2022, the lineage will be recorded as NA. Note that attempts were made to measure the lineage/sequence for 100% of selected cases, enabling addressing this issue in the data analysis. Data analyses will restrict to Omicron BA.1 cases, although if the number of non-naïve cases has more than 10% of missing lineages, then missing data methods may be used that account for missing lineage. A separate SAP describes an

approach to doing this using hotdeck multiple imputation, similar to as in [Sun et al. \(2020\)](#), which may be added to this SAP if needed.

## References

- Atmar, R.L., Lyke, K.E., Deming, M.E., Jackson, L.A., Branche, A.R., El Sahly, H.M. et al (2022), “Homologous and heterologous Covid-19 booster vaccinations,” *New England Journal of Medicine*, 386, 1046–1057.
- BARDA (2021), “04Nov2021\_VSDVAC\_62\_V300\_AES\_VAC\_62toHistorical\_Assays,” .
- Benkeser, D., Montefiori, D., McDermott, A., Fong, Y., Janes, H., Deng, W. et al (2023), “Comparing antibody assays as correlates of protection against COVID-19 in the COVE mRNA-1273 vaccine efficacy trial,” *Science Translational Medicine*.
- Bergwerk, M., Gonen, T., Lustig, Y., Amit, S., Lipsitch, M., Cohen, C. et al (2021), “Covid-19 breakthrough infections in vaccinated health care workers,” *New England Journal of Medicine*, 385, 1474–1484.
- Doria-Rose, N., Suthar, M.S., Makowski, M., Oâ€™Connell, S., McDermott, A.B., Flach, B. et al (2021), “Antibody persistence through 6 months after the second dose of mRNA-1273 vaccine for Covid-19,” *New England Journal of Medicine*, 384, 2259–2261.
- Fintzi, J. and Follmann, D. (2021), “Assessing vaccine durability in randomized trials following placebo crossover,” *Statistics in Medicine*, 40, 5983–6007.
- Gilbert, P., Fong, Y., Kenny, A. and Carone, M. (2022a), “A Controlled Effects Approach to Assessing Immune Correlates of Protection,” *Biostatistics*.
- Gilbert, P.B., Montefiori, D.C., McDermott, A.B., Fong, Y., Benkeser, D., Deng, W. et al (2022b), “Immune correlates analysis of the mRNA-1273 COVID-19 vaccine efficacy clinical trial,” *Science*, 375, 43–50.
- Gilbert, P.B., Montefiori, D.C., McDermott, A.B., Fong, Y., Benkeser, D., Deng, W. et al (2022c), “Immune correlates analysis of the mRNA-1273 COVID-19 vaccine efficacy clinical trial,” *Science*, 375, 43–50.
- Gilbert, P.B., Isbrucker, R., Andrews, N., Goldblatt, D., Heath, P.T., Izu, A. et al (2022d), “Methodology for a correlate of protection for group B Streptococcus: Report from the Bill & Melinda Gates Foundation workshop held on 10 and 11 February 2021,” *Vaccine*, 40, 4283–4291.
- Huang, Y., Borisov, O., Kee, J.J., Carpp, L.N., Wrin, T., Cai, S. et al (2021), “Calibration of two validated SARS-CoV-2 pseudovirus neutralization assays for COVID-19 vaccine evaluation,” *Scientific reports*, 11, 23921.
- Joffe, M. and Greene, T. (2009), “Related causal frameworks for surrogate outcomes.” *Biometrics*, 65, 530–538.



- Lyke, K.E., Atmar, R.L., Islas, C.D., Posavad, C.M., Szydlo, D., Chourdury, R.P. et al (2022), “Rapid decline in vaccine-boosted neutralizing antibodies against SARS-CoV-2 Omicron variant,” *Cell Reports Medicine*, 3.
- Sun, Y., Qi, L., Heng, F. and Gilbert, P.B. (2020), “A hybrid approach for the stratified mark-specific proportional hazards model with missing covariates and missing marks, with application to vaccine efficacy trials,” *Journal of the Royal Statistical Society: Series C (Applied Statistics)*, 69, 791–814.
- Van der Laan, L. and Gilbert, P. (2022), “Targeted semiparametric estimation of the relative strain-specific conditional vaccine-efficacy in observational studies with cases-only data,” .

## Appendix A: Stage 2 Sampling: Stratified Case-Control Samples in 3-dose vaccine recipients

### Appendix A.1 Stratified case-control sampling

Participants in P301 started receiving booster dose in Sep-2021 (first subject first booster dose 23-Sep-2021 in P301 Part C), and a total of 19,609 participants received a booster dose in Part C (Part C Safety Set, data cutoff date: 05-Apr-2022). Part C Safety Set will be used as the source dataset to sample for the stage 2 sampling. In this sampling plan, Omicron case, is approximated by adjudicated COVID-19 case (positive RT-PCR for SARS-CoV-2 with eligible symptoms)  $\geq 7$  days post BD29 AND  $\geq 01$ -Dec-2021 given the emergence of Omicron (BA.1) wave. Primary endpoint COVID-19 cases with known Omicron BA.1 lineage are prioritized for sampling. The sampling of cases and controls are further stratified by the following:

1. Originally randomized to mRNA-1273 (mRNA-1273, original vaccine arm) vs. placebo recipients in the blinded phase (Part A) who received mRNA-1273 primary series in Part B (Placebo-mRNA-1273, cross-over vaccine arm), these two groups/arms create useful variability in the time between the two-dose vaccination series and the booster dose.
2. Calendar period a participant received a booster (23-Sep to 15-Oct-2021, 16-Oct to 31-Oct-2021, Nov-2021, Dec-2021).
3. naïve vs. non-naïve cohorts, where naïve participants are those with no evidence of SARS-CoV-2 infection through the day of receiving booster (BD-Day 1, or pre-booster, or BD1); and non-naïve participants are those with evidence of infection in [date of 2nd dose of the primary series + 14 days, BD1]. Infection is defined by either a positive RT-PCR for SARS-CoV-2, or conversion from non-positive to positive by Roche Elecsys assay (NP).

An equal number of cases vs. non-cases, 8 within each of the stratum defined by the above cross-classification will be sampled, as presented in Table 1 below. Primary endpoint COVID-19 cases with known Omicron BA.1 lineage are prioritized for sampling. If fewer than 8 such eligible cases are available for sampling, then the remainder of the cell is filled with eligible cases with unknown lineage. For cases, antibodies at 3 timepoints: pre-booster Day 1 (BD1), 1 month/28 days after booster (BD29) and illness Day 1 (DD1) will be measured; for non-cases, antibodies at 2 timepoints: BD 1 and BD29 will be measured.

### Appendix A.2 Specifications for Sampling

Participants who are in Per-protocol Primary Series analysis set and received booster dose (ADSL.PPPSFL = 'Y' AND ADSL.TR03SDT > .) are used for sampling. Eligible participants to be sampled also requires Case/Non-case, naïve/non-naïve, received booster during [23-Sep-2021, 31-Dec-2021] as defined in section 2.1.

For cases, severe Omicron COVID-19 cases (onset  $\geq 01$ -Dec-2021) will be sampled first. Within each stratum, a random number generator function with seed of 1273 is used. Sampled participants who did not have sufficient serum samples available at the planned timepoints (BD1 and BD29 for non-cases, BD1, BD29, and DD1 for cases) will be replaced. Based on preliminary review of data, the number of non-naïve Omicron COVID-19 cases is very limited. Thus, for non-naïve Omicron cases,

eligible primary endpoint COVID-19 cases will be sampled first. The remaining non-naïve cases will be sampled from infection cases (positive RT-PCR not necessarily with eligible symptom(s)), first from those with known Omicron BA.1 lineage, then from those likely to be Omicron BA.1. For these non-naïve Omicron COVID-19 cases and infections, every effort will be made to sample up to 8 participants, even if serum samples are not available at all 3 preferred timepoints (BD1, BD29, and DD1). If there are still not sufficient non-naïve cases, to fill out the 8 cases additional adjudicated COVID-19 cases 7 days post BD29 with onset  $\geq$  01-Dec-2021. In summary, in the situation available non-naïve cases are  $<8$  in a cell, effort will be made: to sample a total of 16 cases for each arm per boosting calendar period as described above. Effort will be made to maintain 1:1 ratio between case: non-case for naïve and non-naïve cohort. In the situation when there are only  $x$  ( $<8$ ) non-naïve cases to be sampled,  $16-x$  naïve cases will be sampled to reach a total of 16 cases. Correspondingly,  $16-x$  naïve non-cases and  $x$  non-naïve non-cases will be sampled to maintain 1:1 between cases: non-cases, as illustrated as an example in the table below:

|              |      |    |
|--------------|------|----|
| Omicron case | 16-x | x  |
|              | N    | NN |
| non-case     | 16-x | x  |
|              | N    | NN |

When feasible, for each set of 8N (naïve) or 8NN (non-naïve) in a cell, sample 2:1:1:2:1:1 from baseline demographic strata: Age  $\geq$  65 minority; Age 18-64 ‘at risk’ minority; Age 18-64 ‘not at risk’ minority; Age  $\geq$  65 non-minority; Age 18-64 ‘at risk’ non-minority; Age 18-64 ‘not at risk’ non-minority, i.e. to enrich/over-sample those Age  $\geq$  65].

## Appendix B: Notes for construction of a mock data set

1. Need the mock data set to include all of the variables used for sampling as described in Table 1, which means adding a variable coding the four calendar boosting intervals, and adding a new variable to indicate naïve vs. Non-naïve. This is needed for computing sampling weights as well as for other purposes such as covariate adjustment.
2. The markers that need to be simulated are BD1, BD29 values (and DD1 values for cases) of:
  - $\log_{10}$  nAb titer to D614G
  - $\log_{10}$  nAb titer to BA.1
  - $\log_{10}$  anti-Spike IgG to D614
  - $\log_{10}$  anti-Spike IgG to Gamma
  - $\log_{10}$  anti-Spike to Alpha
  - $\log_{10}$  anti-Spike to Beta
  - $\log_{10}$  anti-Spike to Delta AY4

- $\log_{10}$  anti-Spike to BA.1
- $\log_{10}$  anti-RBD IgG to D614

For the naïve cohort, the BD1, BD29, and DD1 values could all be taken to be like D29, D57, and D29 values against D614/D614G of baseline negatives from the original COVE study, respectively, by assay type MSD/binding and pseudovirus neutralization, using BAU/ml and IU50/ml. For readouts to strains other than D614/D614G, will re-sample from the D614/D614G strain data. For the Non-naïve cohort, the BD1 and BD29 values could be taken from the D29 and D57 values against D614/D614G of baseline positives from the original COVE study, respectively, by assay type MSD/binding and pseudovirus neutralization. For DD1 values, could be taken from the D29 values against D614/D614G of baseline positives from the original COVE study. After readouts are calculated, for the MSD binding antibody data, values below the constant/non-strain-specific LLOQ (on the BAU/ml scale) are set to LLOQ/2, and for the nAb ID50 titer data, values below the constant/non-strain-specific LOD (on the IU50/ml scale) are set to LOD/2.

## Appendix C: Miscellaneous

`tfinal.tpeak` is the minimum of `tfinal.tpeak` for each of four quadrants (2 trt \* 2 naive status) and no larger than 105 (Dean et al’s analyses). Within each quadrant, it is defined as smaller of the two: 1) time of the last case, 2) last time to have 15 ph2 samples at risk.

## Appendix D: Definition of Stage-2 Per-Protocol Population

Booster dose correlates studies will be restricted to the “stage-2 per-protocol” (BDPerprotocol) population where the flag `BDPerprotocol == TRUE` if the participant satisfies the following two criteria:

1. The participant was in the original blinded-phase per-protocol cohort as in [Gilbert et al. \(2022b\)](#);
2. The participant received the booster dose (third mRNA-1273 dose) before and including December 31, 2021;

and belongs to one of the following 4 sampling strata:

1. “Case/Naïve”
2. “Case/Non-Naïve”
3. “Non-Case/Naïve”
4. “Non-Case/Non-Naïve”

where “naïve,” “non-naïve,” “case,” and “non-case” are defined as follows:

**Naïve** No evidence of SARS-CoV-2 infection detected by elecsys or RT-PCR from enrollment through BD1;

**Non-Naïve** Any evidence of SARS-CoV-2 infection in the interval [14 days after the second dose of mRNA-1273 vaccine, BD1];

**Case** 1) If a participant is naïve, then case is Omicron COVID-19 event in the interval [max(7 days post BD29, 01 Dec2021), 16 May 2022 database lock date]; 2) If a participant is non-naïve, then case is SARS-CoV-2 infection detected by Elecsys or RT-PCR in the interval [max(7 days post BD29, 01 Dec2021), 16 May 2022] and the Elecsys test was not positive at BD-D1 pre-booster;

**Non-Case** No evidence of SARS-CoV-2 infection detected by Elecsys or RT-PCR in the interval (BD1, 16 May 2022 database lock date].

For all analyses of the peak immune correlates (i.e., BD29 response), the “per-protocol” status further requires that

1. The participant did not miss a BD29 visit;
2. The participant had a BD29 measurement (approximate peak measurement) that was between 19 and 45 days, both inclusive, of the BD1 visit;
3. The participant was not censored or had any evidence of infection before 7 days post BD29 visit.
4. The participant did not live with HIV.
5. The participant did not acquire a non-adjudicated Omicron endpoint.
6. The participant did not test SARS-CoV-2 RT-PCR positive at the BD1 visit.

In the correlates studies of the “per-protocol” population, a study participant would be considered “naïve” by BD1 if there was no evidence of SARS-CoV-2 infection (RT-PCR+, Roche Elecsys seropositive, or a symptomatic COVID-19 endpoint followed by positive confirmatory testing) from enrollment to BD1 (including the BD1 visit). A study participant is considered “non-naïve” if the participant showed any evidence of COVID-19 starting 14 days post the second immunization in the primary series and through the BD1 visit.

Because a participant who tested PCR+ at BD1 was excluded from the per-protocol cohort, the person would not be associated with a naïve/non-naïve status.
