# Supplementary material for: Omicron COVID-19 immune correlates analysis of a third dose of mRNA-1273 in the COVE trial
Source: PubMed Central journal article supplement (PMC11390939; doi:10.1038/s41467-024-52348-9), 2024-09-11
Supplement: 41467_2024_52348_MOESM3_ESM.pdf [file 41467_2024_52348_MOESM3_ESM.pdf]

### **Description of Additional Supplementary Files**

File Name: Supplementary Software 1

Description: The zip file includes an RMD file, "exposure\_proximal\_code", which helps walk through all code and produce all results/figures; a mock dataset, "dat\_full\_mock.csv", a README txt file, and a data dictionary. The running time is < 2 mins.
